# Supplementary material for: The global, regional, and national burden of oesophageal cancer and its attributable risk factors in 195 countries and territories, 1990–2017: a systematic analysis for the Global Burden of Disease Study 2017
Source: PubMed Central journal article supplement (PMC7232026; doi:10.1016/s2468-1253(20)30007-8), 2020-04-01
Supplement: mmc1.pdf [file mmc1.pdf]

# THE LANCET

## Gastroenterology & Hepatology

### Supplementary appendix

This appendix formed part of the original submission and has been peer reviewed. We post it as supplied by the authors.

Supplement to: GBD 2017 Oesophageal Cancer Collaborators. The global, regional, and national burden of oesophageal cancer and its attributable risk factors in 195 countries and territories, 1990–2017: a systematic analysis for the Global Burden of Disease Study 2017. *Lancet Gastroenterol Hepatol* 2020; published online April 1. [https://doi.org/10.1016/S2468-1253\(20\)30007-8](https://doi.org/10.1016/S2468-1253(20)30007-8).

## Supplementary appendix

Supplement to: **Global, regional, and national burden of oesophageal cancer and its attributable risk factors, 1990–2017: a systematic analysis for the Global Burden of Disease Study 2017**

### Contents:

**Appendix Figure 1:** Number of incident cases of oesophageal cancer for 21 Global Burden of Disease regions from 1990 to 2017

**Appendix Figure 2:** Number of deaths due to oesophageal cancer for 21 Global Burden of Disease regions from 1990 to 2017

**Appendix Figure 3:** The percentage change in age-standardised incidence rates of oesophageal cancer for 21 Global Burden of Disease regions, by sex, 1990–2017

**Appendix Figure 4:** The percentage change in age-standardised death rates of oesophageal cancer from 1990 to 2017 for 21 Global Burden of Disease regions, by sex

**Appendix Figure 5:** The percentage change in age-standardised incidence rates of oesophageal cancer for 195 countries and territories from 1990 to 2017

**Appendix Figure 6:** The percentage change in age-standardised death rates of oesophageal cancer for 195 countries and territories from 1990 to 2017

**Appendix Figure 7:** Global number of YLLs and YLDs and age-standardised rates of YLLs and YLDs per 100 000 population due to oesophageal cancer by age, 2017; Dotted and dashed lines indicate 95% upper and lower uncertainty intervals, respectively. YLDs=years lived with disability. YLLs=years of life lost.

**Appendix Figure 8:** Age-standardised incidence rates for oesophageal cancer for 21 Global Burden of Disease regions by Socio-demographic Index, 1990–2017; Expected values based on Socio-demographic Index and disease rates in all locations are shown as the black line. For each region, points from left to right depict estimates from each year from 1990 to 2017.

**Appendix Figure 9:** Age-standardised mortality rates for oesophageal cancer for 21 Global Burden of Disease regions by Socio-demographic Index, 1990–2017; Expected values based on Socio-demographic Index and disease rates in all locations are shown as the black line. For each region, points from left to right depict estimates from each year from 1990 to 2017.

**Appendix Figure 10:** The association between Sociodemographic index (SDI), Healthcare Access and Quality (HAQ) index, indoor air pollution, access to piped water, and proportion of oesophageal squamous cell carcinoma (OSCC) to oesophageal adenocarcinoma (OA) for 151 countries

**Appendix Figure 11:** The association between gastro-oesophageal reflux diseases and proportion of oesophageal squamous cell carcinoma (OSCC) to all oesophageal cancer (OC) for 151 countries

**Appendix Table 1:** Sequelae for oesophageal cancer and associated disability weights from Global Burden of Disease 2017.

**Appendix Table 2:** Incident cases of oesophageal cancer in 1990 and 2017 for both sexes and percentage change of age-standardised rates per 100,000 by location

**Appendix Table 3:** Deaths due to oesophageal cancer in 1990 and 2017 for both sexes and percentage change of age-standardised rates per 100,000 by location

**Appendix Table 4:** DALYs due to oesophageal cancer in 1990 and 2017 for both sexes and percentage change of age-standardised rates per 100,000 by location

**Appendix Table 5.** Country-level proportion of oesophageal squamous cell carcinoma (OSCC) to all oesophageal cancer (OC) cases, Socio-demographic Index (SDI), access to piped water, indoor air pollution index, and Healthcare Access and Quality (HAQ) Index. Results are sorted by OSCC to OC proportion.

**Appendix Figure 1: Number of incident cases of oesophageal cancer for 21 Global Burden of Disease regions from 1990 to 2017**

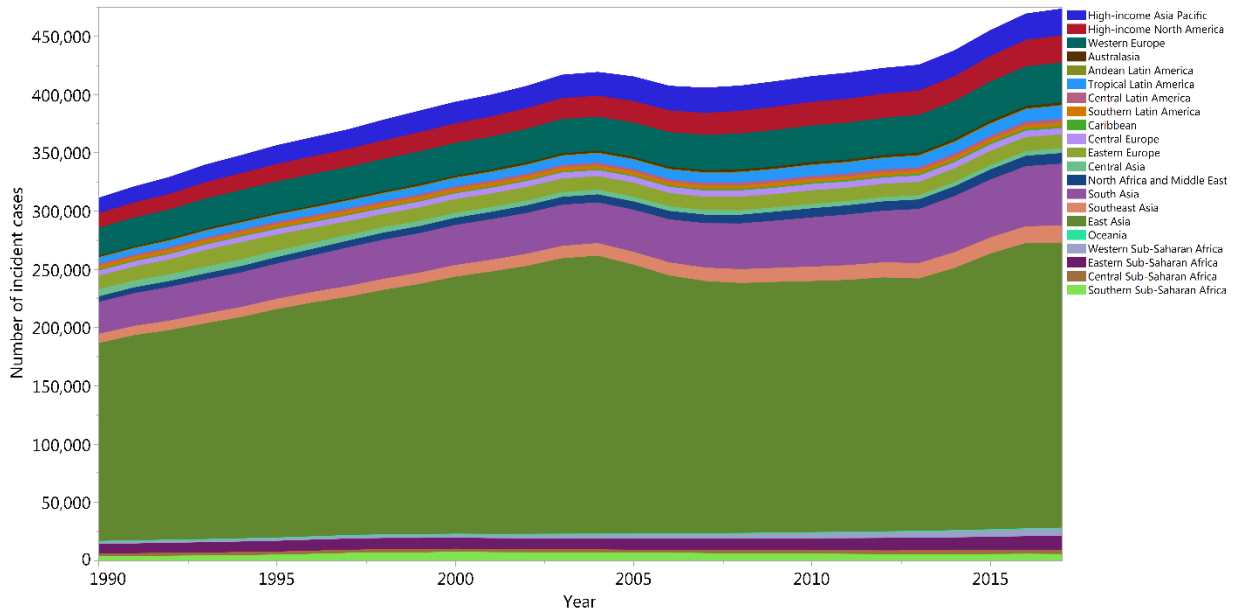

**Appendix Figure 2: Number of deaths due to oesophageal cancer for 21 Global Burden of Disease regions from 1990 to 2017**

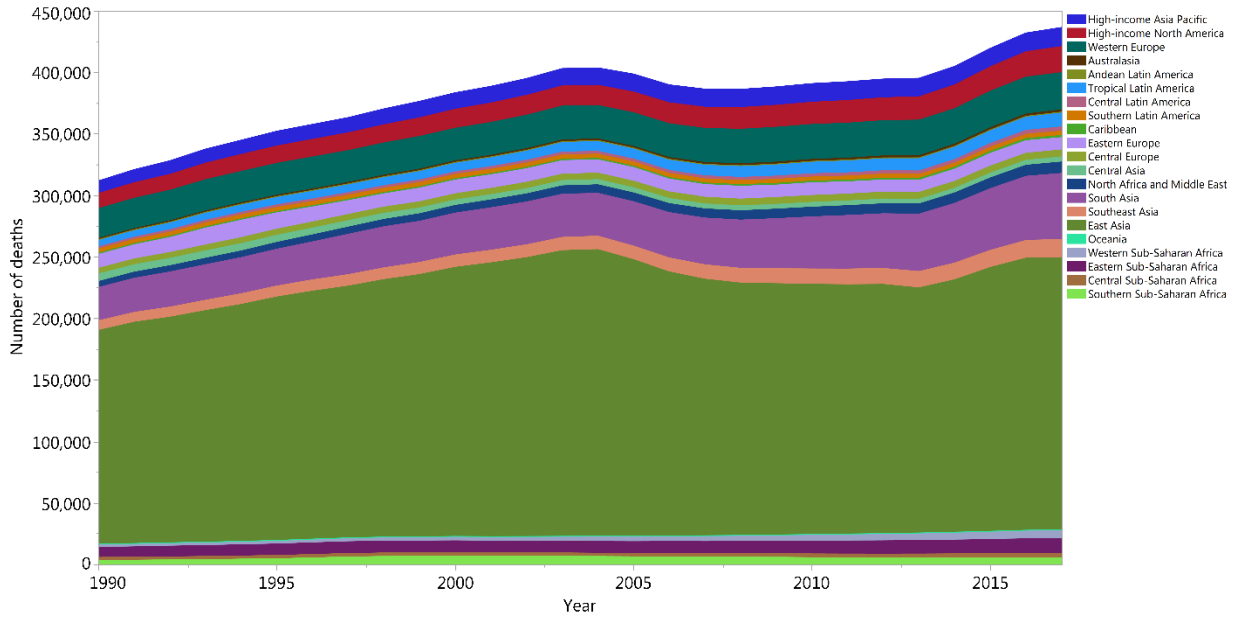

**Appendix Figure 3: The percentage change in age-standardised incidence rates of oesophageal cancer for 21 Global Burden of Disease regions, by sex, 1990–2017**

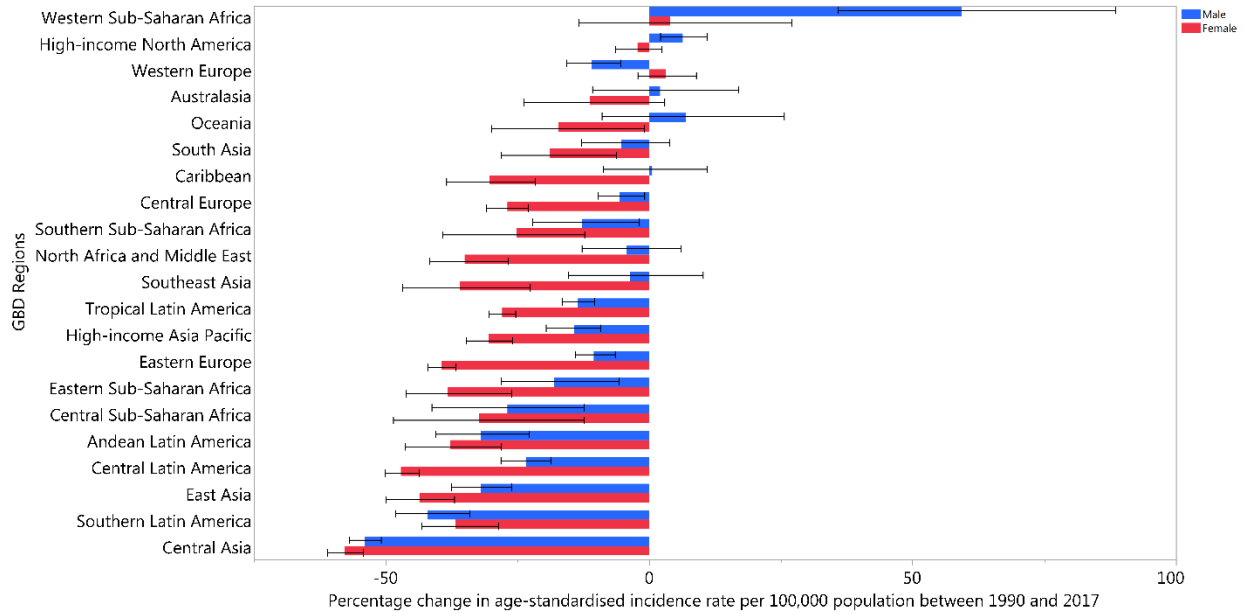

**Appendix Figure 4: The percentage change in age-standardised death rates of oesophageal cancer from 1990 to 2017 for 21 Global Burden of Disease regions, by sex**

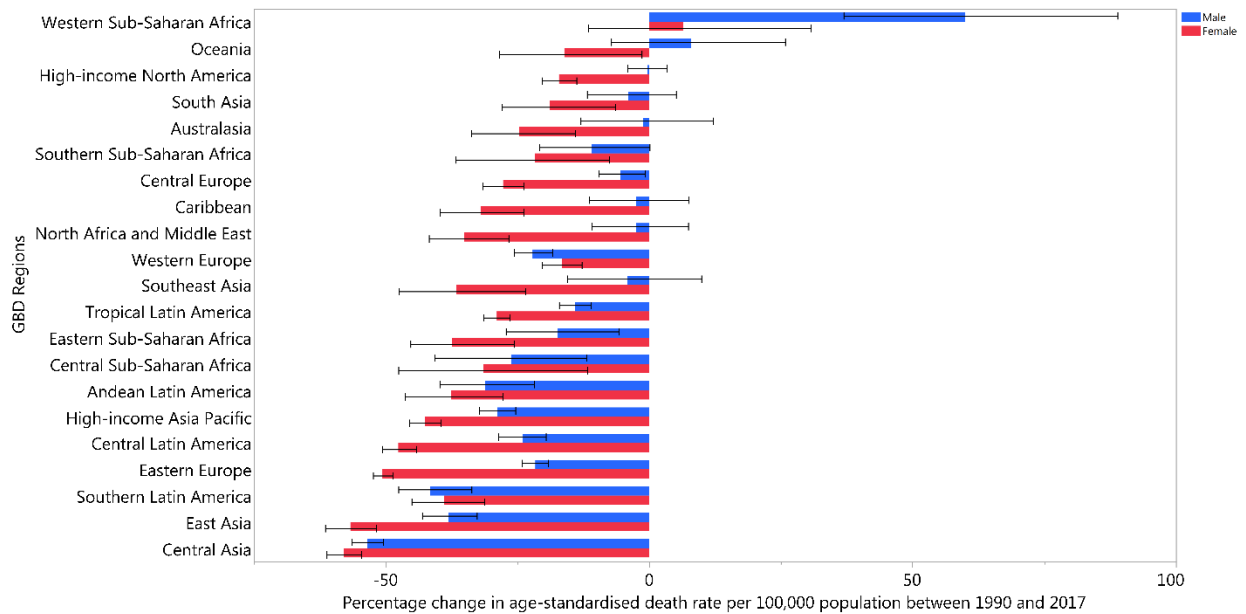

**Appendix Figure 5: The percentage change in age-standardised incidence rates of oesophageal cancer for 195 countries and territories from 1990 to 2017**

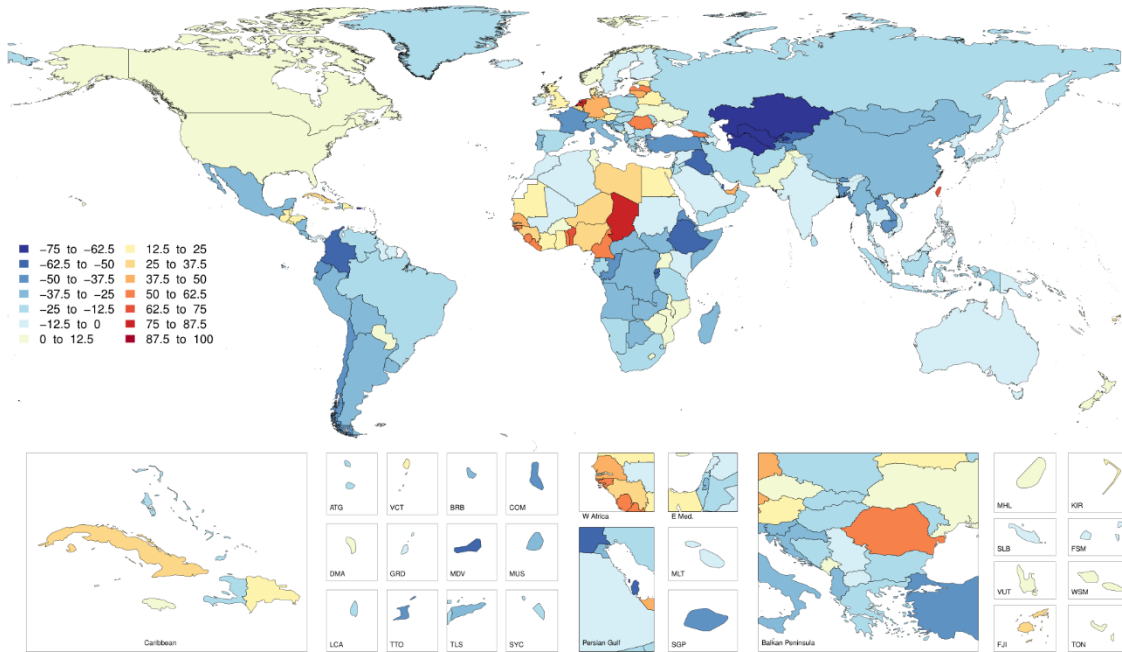

**Appendix Figure 6: The percentage change in age-standardised death rates of oesophageal cancer for 195 countries and territories from 1990 to 2017**

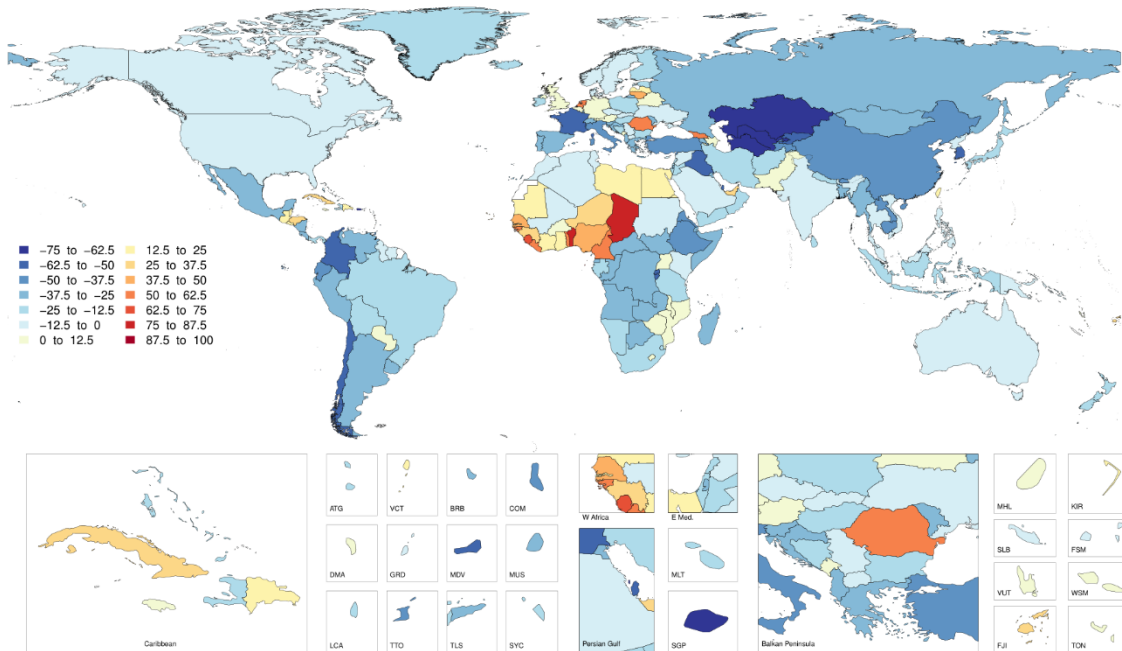

**Appendix Figure 7: Global number of YLLs and YLDs and age-standardised rates of YLLs and YLDs per 100 000 population due to oesophageal cancer by age, 2017.** Dotted and dashed lines indicate 95% upper and lower uncertainty intervals, respectively. YLDs=years lived with disability. YLLs=years of life lost.

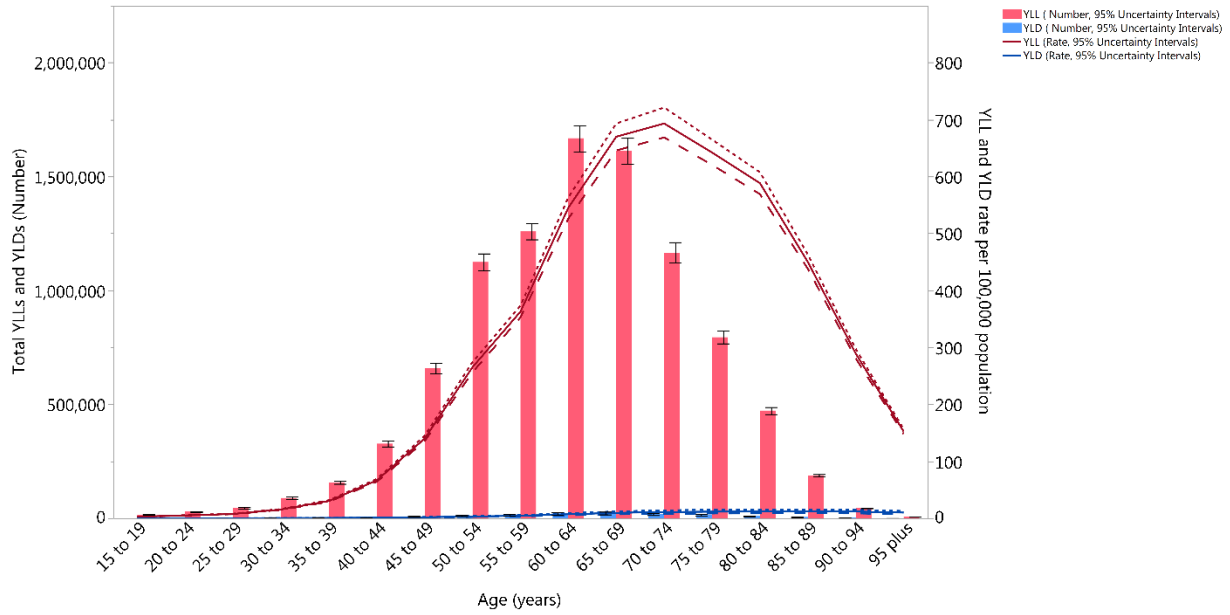

**Appendix Figure 8: Age-standardised incidence rates for oesophageal cancer for 21 Global Burden of Disease regions by Socio-demographic Index, 1990–2017.** Expected values based on Socio-demographic Index and disease rates in all locations are shown as the black line. For each region, points from left to right depict estimates from each year from 1990 to 2017.

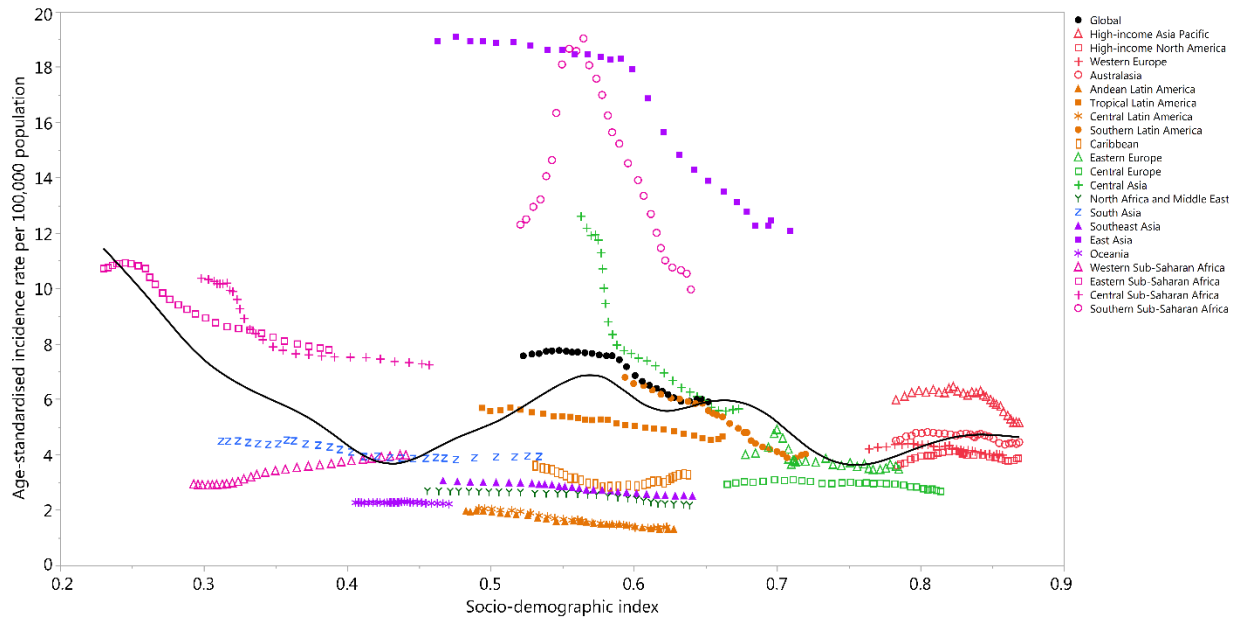

**Appendix Figure 9: Age-standardised mortality rates for oesophageal cancer for 21 Global Burden of Disease regions by Socio-demographic Index, 1990–2017.** Expected values based on Socio-demographic Index and disease rates in all locations are shown as the black line. For each region, points from left to right depict estimates from each year from 1990 to 2017.

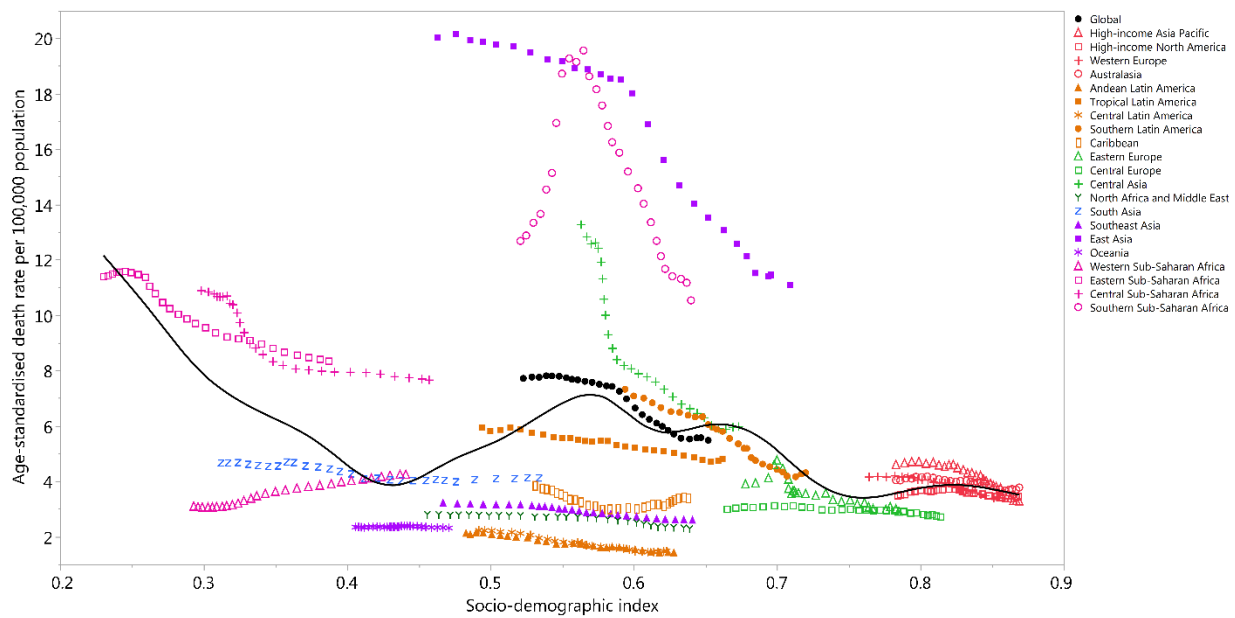

**Appendix Figure 10: The association between Sociodemographic index (SDI), Healthcare Access and Quality (HAQ) index, indoor air pollution, access to piped water, and proportion of oesophageal squamous cell carcinoma (OSCC) to oesophageal adenocarcinoma (OA) for 151 countries**

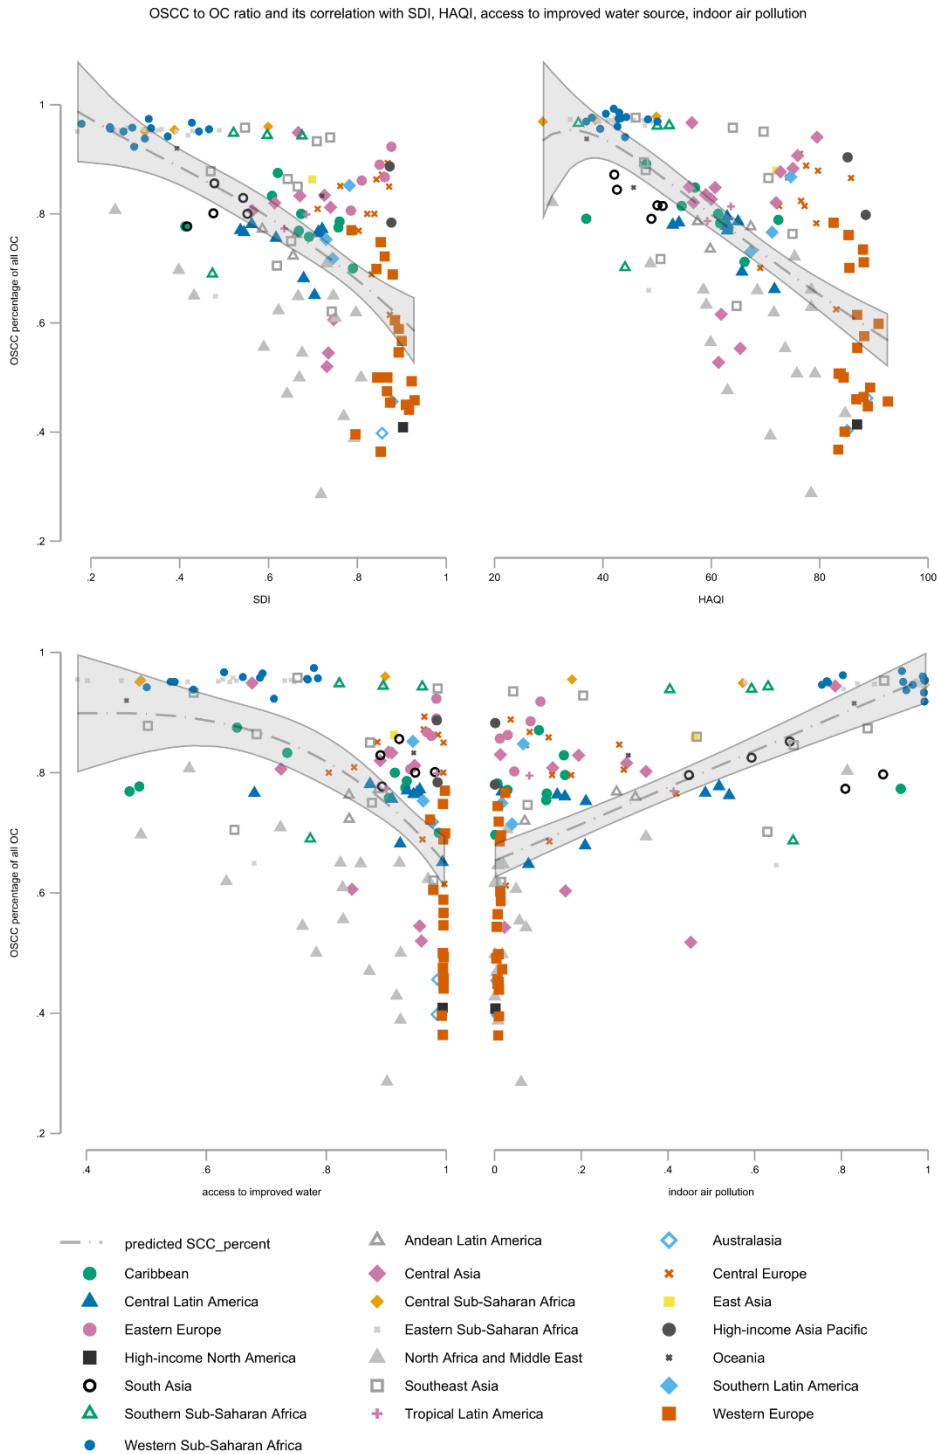



**Appendix Figure 11: The association between gastro-oesophageal reflux diseases and proportion of oesophageal squamous cell carcinoma (OSCC) to all oesophageal cancer (OC) for 151 countries**

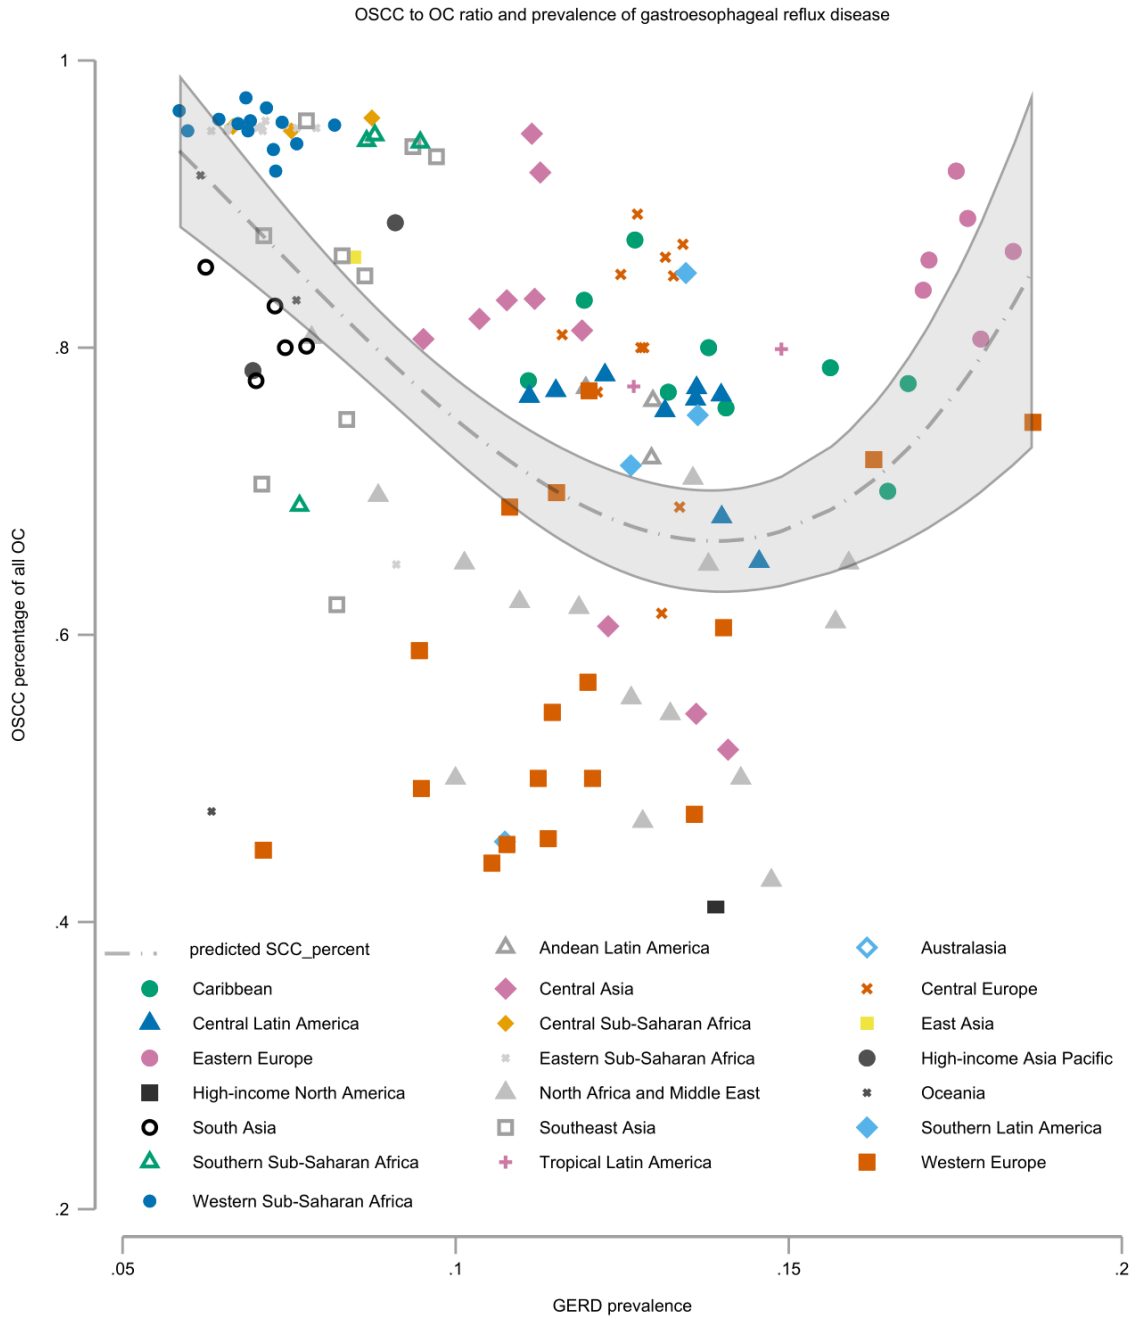

**Appendix Table 1: Sequelae for oesophageal cancer and associated disability weights from Global Burden of Disease 2017**

| Sequela                             | Health state name                                                             | Lay description                                                                                                                                                               | Disability weight (95% CI) |
|-------------------------------------|-------------------------------------------------------------------------------|-------------------------------------------------------------------------------------------------------------------------------------------------------------------------------|----------------------------|
| Diagnosis and primary therapy phase | Cancer, diagnosis and primary therapy                                         | Has pain, nausea, fatigue, weight loss and high anxiety.                                                                                                                      | 0.288<br>(0.193–0.399)     |
| Controlled phase                    | Generic uncomplicated disease: worry and daily medication                     | Has a chronic disease that requires medication every day and causes some worry but minimal interference with daily activities.                                                | 0.049<br>(0.031–0.072)     |
| Metastatic phase                    | Cancer, metastatic                                                            | Has severe pain, extreme fatigue, weight loss, and high anxiety.                                                                                                              | 0.451<br>(0.307–0.600)     |
| Terminal phase                      | Terminal phase, with medication (for cancers, end-stage kidney/liver disease) | Has lost a lot of weight and regularly uses strong medication to avoid constant pain. The person has no appetite, feels nauseated, and needs to spend most of the day in bed. | 0.540<br>(0.377–0.687)     |

GBD=Global Burden of Disease. CI=Confidence interval

**Appendix Table 2: Incident cases of oesophageal cancer in 1990 and 2017 for both sexes and percentage change of age-standardised rates per 100 000 by location**

|                                  | 1990                              |                          | 2017                              |                          | Percentage change in age-standardised rates between 1990 and 2017 |
|----------------------------------|-----------------------------------|--------------------------|-----------------------------------|--------------------------|-------------------------------------------------------------------|
|                                  | Counts (95% UI)                   | Rate (95% UI)            | Counts (95% UI)                   | Rate (95% UI)            |                                                                   |
| <b>Global</b>                    | <b>310236</b><br>(300690, 322028) | <b>7·6</b><br>(7·3, 7·9) | <b>472525</b><br>(459485, 485294) | <b>5·9</b><br>(5·7, 6·1) | <b>-22</b><br>(-25·2, -18·6)                                      |
| <b>High-income North America</b> | <b>12625</b><br>(12476, 12793)    | <b>3·6</b><br>(3·6, 3·7) | <b>23420</b><br>(22732, 24124)    | <b>3·9</b><br>(3·8, 4)   | <b>7·4</b><br>(3·9, 11·1)                                         |
| Canada                           | 1229<br>(1181, 1278)              | 3·7<br>(3·6, 3·9)        | 2722<br>(2472, 3004)              | 4·1<br>(3·7, 4·5)        | 10·6<br>(-0·4, 23·5)                                              |
| Greenland                        | 5<br>(4, 5)                       | 13·2<br>(12·1, 14·4)     | 7<br>(7, 8)                       | 10·8<br>(9·7, 11·8)      | -18·7<br>(-28·8, -7·1)                                            |
| USA                              | 11391<br>(11248, 11556)           | 3·6<br>(3·6, 3·7)        | 20690<br>(20041, 21331)           | 3·9<br>(3·7, 4)          | 6·7<br>(3·1, 10·4)                                                |
| <b>Australasia</b>               | <b>1086</b><br>(1054, 1121)       | <b>4·5</b><br>(4·4, 4·7) | <b>2165</b><br>(1961, 2382)       | <b>4·4</b><br>(4, 4·9)   | <b>-1·4</b><br>(-10·8, 9·2)                                       |
| Australia                        | 901<br>(871, 934)                 | 4·5<br>(4·3, 4·7)        | 1796<br>(1597, 2006)              | 4·4<br>(3·9, 4·9)        | -2·6<br>(-13·6, 9·3)                                              |
| New Zealand                      | 185<br>(173, 197)                 | 4·6<br>(4·3, 4·9)        | 370<br>(333, 410)                 | 4·8<br>(4·3, 5·3)        | 5·5<br>(-6·6, 18·5)                                               |
| <b>High-income Asia-Pacific</b>  | <b>12361</b><br>(12150, 12560)    | <b>6</b><br>(5·9, 6·1)   | <b>22145</b><br>(20956, 23212)    | <b>5·1</b><br>(4·9, 5·4) | <b>-13·8</b><br>(-18·5, -9·3)                                     |
| Brunei                           | 4<br>(3, 4)                       | 3·6<br>(3·2, 4)          | 7<br>(6, 8)                       | 2·4<br>(2·1, 2·8)        | -32·6<br>(-43·1, -20·5)                                           |
| Japan                            | 10667<br>(10485, 10848)           | 6·1<br>(6, 6·2)          | 19202<br>(18203, 20140)           | 5·8<br>(5·5, 6·1)        | -4·3<br>(-9·4, 0·5)                                               |
| Singapore                        | 83<br>(78, 88)                    | 3·7<br>(3·5, 3·9)        | 133<br>(118, 151)                 | 1·9<br>(1·7, 2·2)        | -47·7<br>(-54·4, -40·8)                                           |
| South Korea                      | 1608<br>(1541, 1679)              | 5<br>(4·8, 5·3)          | 2801<br>(2414, 3216)              | 3·2<br>(2·8, 3·7)        | -35·6<br>(-45·3, -25·8)                                           |
| <b>Western Europe</b>            | <b>24078</b><br>(23712, 24466)    | <b>4·2</b><br>(4·2, 4·3) | <b>34183</b><br>(32753, 35615)    | <b>4</b><br>(3·8, 4·2)   | <b>-5·2</b><br>(-9·6, -0·5)                                       |
| Andorra                          | 2<br>(2, 2)                       | 3·5<br>(3, 4·1)          | 5<br>(4, 6)                       | 3·5<br>(2·9, 4·2)        | 1<br>(-18·5, 22·4)                                                |
| Austria                          | 254<br>(244, 267)                 | 2·2<br>(2·1, 2·3)        | 453<br>(410, 501)                 | 2·7<br>(2·5, 3)          | 23·1<br>(9·9, 38·4)                                               |
| Belgium                          | 504<br>(484, 524)                 | 3·3<br>(3·2, 3·5)        | 892<br>(812, 977)                 | 4·2<br>(3·8, 4·6)        | 25·5<br>(13·4, 39)                                                |
| Cyprus                           | 9<br>(8, 10)                      | 1<br>(0·9, 1·2)          | 21<br>(19, 24)                    | 1·1<br>(1, 1·3)          | 8·4<br>(-9·2, 31·5)                                               |
| Denmark                          | 338<br>(324, 352)                 | 4·2<br>(4·1, 4·4)        | 537<br>(489, 584)                 | 4·8<br>(4·4, 5·2)        | 14<br>(3·4, 25·6)                                                 |
| Finland                          | 227<br>(215, 240)                 | 3·1<br>(3, 3·3)          | 344<br>(312, 379)                 | 2·9<br>(2·7, 3·3)        | -6·2<br>(-16, 5·8)                                                |
| France                           | 5492<br>(5314, 5691)              | 7<br>(6·8, 7·2)          | 4550<br>(4150, 4973)              | 3·6<br>(3·3, 4)          | -47·9<br>(-52·6, -42·4)                                           |
| Germany                          | 4195<br>(4011, 4411)              | 3·4<br>(3·3, 3·6)        | 8010<br>(7000, 9118)              | 4·8<br>(4·1, 5·4)        | 38·4<br>(19·9, 60·2)                                              |
| Greece                           | 243<br>(232, 254)                 | 1·6<br>(1·5, 1·6)        | 280<br>(255, 309)                 | 1·2<br>(1·1, 1·4)        | -20·7<br>(-28·8, -11·6)                                           |
| Iceland                          | 13<br>(12, 14)                    | 4·6<br>(4·3, 4·9)        | 23<br>(21, 26)                    | 4·4<br>(4, 4·9)          | -2·6<br>(-13·8, 11)                                               |
| Ireland                          | 264<br>(254, 275)                 | 6·3<br>(6·1, 6·6)        | 443<br>(394, 490)                 | 6·1<br>(5·4, 6·8)        | -3·2<br>(-14·1, 7·9)                                              |
| Israel                           | 75<br>(70, 79)                    | 1·5<br>(1·4, 1·6)        | 144<br>(131, 159)                 | 1·3<br>(1·2, 1·4)        | -17<br>(-25·1, -7·8)                                              |
| Italy                            | 2438<br>(2359, 2525)              | 2·8<br>(2·7, 2·9)        | 2468<br>(2242, 2728)              | 1·8<br>(1·7, 2)          | -33·7<br>(-40·4, -25·8)                                           |
| Luxembourg                       | 23<br>(21, 24)                    | 4·1<br>(3·9, 4·4)        | 34<br>(30, 38)                    | 3·6<br>(3·1, 4·1)        | -13·3<br>(-25·7, 1·3)                                             |

|                               |                                 |                         |                                 |                           |                                 |
|-------------------------------|---------------------------------|-------------------------|---------------------------------|---------------------------|---------------------------------|
| Malta                         | 11<br>(10, 12)                  | 2.5<br>(2.3, 2.7)       | 20<br>(18, 22)                  | 2.4<br>(2.1, 2.6)         | -5.8<br>(-15.9, 5.2)            |
| Netherlands                   | 782<br>(754, 813)               | 3.9<br>(3.8, 4.1)       | 2391<br>(2182, 2630)            | 7.3<br>(6.6, 8)           | 86.6<br>(68.2, 106.6)           |
| Norway                        | 164<br>(158, 172)               | 2.5<br>(2.4, 2.6)       | 251<br>(234, 269)               | 2.7<br>(2.5, 2.9)         | 11.3<br>(2.6, 20.9)             |
| Portugal                      | 573<br>(551, 597)               | 4.2<br>(4, 4.3)         | 649<br>(591, 717)               | 3.1<br>(2.8, 3.5)         | -25.2<br>(-32.7, -16.5)         |
| Spain                         | 1902<br>(1824, 1988)            | 3.5<br>(3.4, 3.7)       | 2485<br>(2229, 2784)            | 2.8<br>(2.5, 3.2)         | -20.1<br>(-29.2, -9.8)          |
| Sweden                        | 411<br>(395, 428)               | 2.7<br>(2.6, 2.8)       | 539<br>(502, 577)               | 2.6<br>(2.5, 2.8)         | -2.4<br>(-9.9, 5.9)             |
| Switzerland                   | 403<br>(386, 420)               | 3.9<br>(3.8, 4.1)       | 548<br>(497, 616)               | 3.3<br>(3, 3.8)           | -15.1<br>(-24.1, -4.2)          |
| United Kingdom                | 5732<br>(5656, 5821)            | 6.2<br>(6.1, 6.3)       | 9062<br>(8824, 9315)            | 7.2<br>(7, 7.4)           | 16.4<br>(13, 20.2)              |
| <b>Southern Latin America</b> | <b>3170<br/>(3091, 3251)</b>    | <b>6.8<br/>(6.6, 7)</b> | <b>3315<br/>(3074, 3632)</b>    | <b>4<br/>(3.7, 4.4)</b>   | <b>-40.9<br/>(-45.7, -34.8)</b> |
| Argentina                     | 2151<br>(2081, 2227)            | 6.6<br>(6.4, 6.8)       | 2206<br>(1978, 2498)            | 4.1<br>(3.7, 4.7)         | -37.1<br>(-44, -28.1)           |
| Chile                         | 675<br>(648, 700)               | 6.9<br>(6.6, 7.2)       | 809<br>(727, 906)               | 3.5<br>(3.1, 3.9)         | -49.6<br>(-55.2, -43.2)         |
| Uruguay                       | 343<br>(328, 360)               | 8.6<br>(8.2, 9)         | 300<br>(265, 336)               | 5.6<br>(4.9, 6.3)         | -35<br>(-43.1, -25.9)           |
| <b>Eastern Europe</b>         | <b>11636<br/>(11286, 11990)</b> | <b>4<br/>(3.9, 4.1)</b> | <b>11804<br/>(11452, 12183)</b> | <b>3.5<br/>(3.4, 3.6)</b> | <b>-13.3<br/>(-16.3, -9.9)</b>  |
| Belarus                       | 351<br>(335, 368)               | 2.6<br>(2.5, 2.7)       | 515<br>(453, 587)               | 3.3<br>(2.9, 3.7)         | 24<br>(8.2, 42.6)               |
| Estonia                       | 62<br>(59, 66)                  | 3<br>(2.8, 3.1)         | 88<br>(73, 107)                 | 3.6<br>(3, 4.4)           | 22.6<br>(0.6, 50.3)             |
| Latvia                        | 101<br>(96, 107)                | 2.7<br>(2.6, 2.9)       | 153<br>(130, 180)               | 4.2<br>(3.5, 4.9)         | 53.3<br>(28, 81.4)              |
| Lithuania                     | 129<br>(123, 135)               | 2.7<br>(2.6, 2.9)       | 216<br>(196, 239)               | 4.1<br>(3.7, 4.5)         | 48.6<br>(33.7, 65.1)            |
| Moldova                       | 105<br>(99, 112)                | 2.2<br>(2.1, 2.4)       | 98<br>(89, 108)                 | 1.7<br>(1.6, 1.9)         | -23.8<br>(-31.9, -15.4)         |
| Russia                        | 8604<br>(8314, 8903)            | 4.6<br>(4.4, 4.7)       | 8372<br>(8169, 8580)            | 3.6<br>(3.5, 3.7)         | -21.5<br>(-24.3, -18.6)         |
| Ukraine                       | 2284<br>(2177, 2396)            | 3.1<br>(3, 3.2)         | 2362<br>(2156, 2607)            | 3.2<br>(2.9, 3.5)         | 3.1<br>(-7.5, 14.6)             |
| <b>Central Europe</b>         | <b>4456<br/>(4373, 4539)</b>    | <b>2.9<br/>(2.9, 3)</b> | <b>5462<br/>(5250, 5679)</b>    | <b>2.7<br/>(2.6, 2.8)</b> | <b>-8.7<br/>(-12.3, -4.8)</b>   |
| Albania                       | 43<br>(40, 46)                  | 1.9<br>(1.8, 2.1)       | 55<br>(45, 69)                  | 1.3<br>(1.1, 1.7)         | -31.2<br>(-45.3, -13.6)         |
| Bosnia and Herzegovina        | 105<br>(98, 113)                | 2.5<br>(2.3, 2.6)       | 123<br>(110, 138)               | 2.1<br>(1.8, 2.3)         | -17.1<br>(-26.9, -5.7)          |
| Bulgaria                      | 282<br>(270, 295)               | 2.2<br>(2.1, 2.3)       | 241<br>(219, 265)               | 1.8<br>(1.6, 2)           | -18.3<br>(-26.7, -8.7)          |
| Croatia                       | 256<br>(244, 269)               | 3.8<br>(3.6, 4)         | 209<br>(190, 228)               | 2.5<br>(2.3, 2.7)         | -34.2<br>(-40.6, -27.4)         |
| Czech Republic                | 408<br>(395, 423)               | 3<br>(2.9, 3.1)         | 598<br>(548, 654)               | 3<br>(2.8, 3.3)           | 1.5<br>(-7.5, 11.6)             |
| Hungary                       | 592<br>(567, 619)               | 4.1<br>(3.9, 4.3)       | 616<br>(565, 669)               | 3.5<br>(3.2, 3.8)         | -14.8<br>(-22.5, -6.7)          |
| Macedonia                     | 25<br>(23, 27)                  | 1.3<br>(1.2, 1.4)       | 43<br>(38, 48)                  | 1.3<br>(1.1, 1.4)         | -1.6<br>(-14.5, 11.9)           |
| Montenegro                    | 16<br>(14, 17)                  | 2.4<br>(2.1, 2.7)       | 24<br>(21, 28)                  | 2.4<br>(2.1, 2.8)         | 0.6<br>(-15, 20)                |
| Poland                        | 1628<br>(1575, 1681)            | 3.6<br>(3.5, 3.7)       | 1969<br>(1808, 2132)            | 2.9<br>(2.7, 3.2)         | -19.3<br>(-26.6, -11.6)         |
| Romania                       | 451<br>(432, 473)               | 1.6<br>(1.5, 1.6)       | 797<br>(734, 866)               | 2.4<br>(2.2, 2.6)         | 52.3<br>(38.7, 66.7)            |

|                              |                                    |                                    |                                    |                                 |                                       |
|------------------------------|------------------------------------|------------------------------------|------------------------------------|---------------------------------|---------------------------------------|
| Serbia                       | 311<br>(278, 348)                  | 2·6<br>(2·3, 2·8)                  | 374<br>(338, 413)                  | 2·4<br>(2·2, 2·7)               | -4·3<br>(-16·1, 9·4)                  |
| Slovakia                     | 240<br>(225, 255)                  | 4<br>(3·8, 4·3)                    | 312<br>(275, 355)                  | 3·5<br>(3·1, 4)                 | -13·4<br>(-24·7, -0·4)                |
| Slovenia                     | 99<br>(94, 104)                    | 3·9<br>(3·7, 4·1)                  | 102<br>(91, 112)                   | 2·5<br>(2·3, 2·8)               | -35·4<br>(-42·9, -27·9)               |
| <b>Central Asia</b>          | <b>6025</b><br><b>(5880, 6169)</b> | <b>12·6</b><br><b>(12·3, 12·9)</b> | <b>4115</b><br><b>(3915, 4321)</b> | <b>5·7</b><br><b>(5·4, 5·9)</b> | <b>-55·1</b><br><b>(-57·5, -52·5)</b> |
| Armenia                      | 62<br>(57, 66)                     | 2·2<br>(2·1, 2·4)                  | 65<br>(60, 71)                     | 1·6<br>(1·4, 1·7)               | -30·7<br>(-37·6, -22·9)               |
| Azerbaijan                   | 426<br>(402, 451)                  | 8·2<br>(7·7, 8·7)                  | 731<br>(636, 860)                  | 8·1<br>(7·1, 9·5)               | -0·5<br>(-14·4, 17·7)                 |
| Georgia                      | 103<br>(95, 111)                   | 1·6<br>(1·5, 1·7)                  | 147<br>(134, 159)                  | 2·6<br>(2·4, 2·8)               | 58·8<br>(41·2, 77·1)                  |
| Kazakhstan                   | 2314<br>(2235, 2396)               | 18<br>(17·4, 18·6)                 | 1062<br>(980, 1149)                | 6·4<br>(6, 6·9)                 | -64·3<br>(-67·2, -61·4)               |
| Kyrgyzstan                   | 233<br>(219, 249)                  | 7·5<br>(7·1, 8)                    | 138<br>(129, 149)                  | 3·4<br>(3·1, 3·6)               | -55·4<br>(-59·3, -51·1)               |
| Mongolia                     | 251<br>(211, 296)                  | 25·7<br>(21·6, 30·2)               | 333<br>(296, 374)                  | 18·5<br>(16·4, 20·8)            | -28·2<br>(-40·1, -13·4)               |
| Tajikistan                   | 286<br>(271, 301)                  | 10<br>(9·4, 10·5)                  | 263<br>(232, 297)                  | 5<br>(4·4, 5·7)                 | -49·6<br>(-56·1, -42·2)               |
| Turkmenistan                 | 614<br>(593, 634)                  | 31·1<br>(30, 32·1)                 | 334<br>(303, 367)                  | 8·7<br>(7·9, 9·6)               | -71·9<br>(-74·6, -69·1)               |
| Uzbekistan                   | 1738<br>(1669, 1807)               | 14·9<br>(14·3, 15·5)               | 1041<br>(920, 1171)                | 4·7<br>(4·2, 5·3)               | -68·1<br>(-71·7, -64·1)               |
| <b>Central Latin America</b> | <b>1707</b><br><b>(1676, 1748)</b> | <b>2</b><br><b>(2, 2·1)</b>        | <b>3162</b><br><b>(3017, 3297)</b> | <b>1·4</b><br><b>(1·3, 1·4)</b> | <b>-32·8</b><br><b>(-36, -29·6)</b>   |
| Colombia                     | 581<br>(559, 606)                  | 3·4<br>(3·3, 3·5)                  | 804<br>(713, 902)                  | 1·5<br>(1·3, 1·7)               | -56·2<br>(-61·1, -50·8)               |
| Costa Rica                   | 45<br>(43, 48)                     | 2·6<br>(2·5, 2·7)                  | 84<br>(76, 92)                     | 1·7<br>(1·6, 1·9)               | -33·9<br>(-40·8, -26·6)               |
| El Salvador                  | 38<br>(35, 41)                     | 1·3<br>(1·2, 1·4)                  | 81<br>(69, 96)                     | 1·4<br>(1·2, 1·7)               | 13·7<br>(-5·3, 35·3)                  |
| Guatemala                    | 48<br>(46, 51)                     | 1·3<br>(1·3, 1·4)                  | 168<br>(150, 188)                  | 1·6<br>(1·4, 1·7)               | 17·2<br>(3·4, 33·6)                   |
| Honduras                     | 26<br>(22, 29)                     | 1·2<br>(1, 1·4)                    | 86<br>(68, 108)                    | 1·5<br>(1·2, 1·8)               | 22·6<br>(-4·8, 60·5)                  |
| Mexico                       | 713<br>(696, 732)                  | 1·6<br>(1·6, 1·7)                  | 1377<br>(1329, 1418)               | 1·2<br>(1·2, 1·3)               | -26·2<br>(-29·2, -23·5)               |
| Nicaragua                    | 16<br>(15, 18)                     | 1<br>(0·9, 1·1)                    | 32<br>(28, 36)                     | 0·7<br>(0·6, 0·8)               | -31·4<br>(-42·3, -18·4)               |
| Panama                       | 22<br>(21, 24)                     | 1·5<br>(1·4, 1·6)                  | 53<br>(48, 58)                     | 1·3<br>(1·2, 1·5)               | -11<br>(-21·1, 0·9)                   |
| Venezuela                    | 218<br>(207, 228)                  | 2·3<br>(2·2, 2·4)                  | 477<br>(406, 554)                  | 1·7<br>(1·5, 2)                 | -24·5<br>(-36·7, -11·4)               |
| <b>Andean Latin America</b>  | <b>403</b><br><b>(382, 427)</b>    | <b>2</b><br><b>(1·9, 2·1)</b>      | <b>699</b><br><b>(631, 767)</b>    | <b>1·3</b><br><b>(1·2, 1·4)</b> | <b>-33·5</b><br><b>(-40·4, -26·5)</b> |
| Bolivia                      | 96<br>(82, 110)                    | 3<br>(2·6, 3·4)                    | 185<br>(146, 234)                  | 2·2<br>(1·8, 2·8)               | -25·8<br>(-43·4, -6·2)                |
| Ecuador                      | 116<br>(110, 122)                  | 2·2<br>(2·1, 2·3)                  | 189<br>(169, 211)                  | 1·3<br>(1·2, 1·5)               | -40·2<br>(-46·9, -32·1)               |
| Peru                         | 191<br>(174, 210)                  | 1·6<br>(1·4, 1·8)                  | 326<br>(276, 377)                  | 1·1<br>(0·9, 1·2)               | -33·1<br>(-44·2, -19)                 |
| <b>Caribbean</b>             | <b>949</b><br><b>(909, 1000)</b>   | <b>3·6</b><br><b>(3·5, 3·8)</b>    | <b>1684</b><br><b>(1546, 1844)</b> | <b>3·3</b><br><b>(3, 3·6)</b>   | <b>-8·9</b><br><b>(-16, -1·3)</b>     |
| Antigua and Barbuda          | 2<br>(1, 2)                        | 3·1<br>(2·9, 3·4)                  | 3<br>(2, 3)                        | 2·6<br>(2·4, 2·9)               | -16·4<br>(-25·4, -5·6)                |
| The Bahamas                  | 9<br>(8, 11)                       | 5·9<br>(5·3, 6·5)                  | 18<br>(16, 21)                     | 4·7<br>(4·2, 5·3)               | -19·7<br>(-31·8, -3·8)                |
| Barbados                     | 15<br>(14, 17)                     | 5·2<br>(4·9, 5·6)                  | 19<br>(17, 21)                     | 3·9<br>(3·5, 4·3)               | -26·1<br>(-34·4, -15·9)               |

|                                  |                                    |                            |                                    |                              |                                 |
|----------------------------------|------------------------------------|----------------------------|------------------------------------|------------------------------|---------------------------------|
| Belize                           | 2<br>(2, 2)                        | 1.8<br>(1.6, 2)            | 6<br>(5, 6)                        | 2.2<br>(2, 2.4)              | 23.4<br>(7.8, 42.3)             |
| Bermuda                          | 4<br>(4, 4)                        | 6.3<br>(5.8, 6.8)          | 5<br>(5, 6)                        | 4.1<br>(3.7, 4.5)            | -34.8<br>(-42.5, -26)           |
| Cuba                             | 360<br>(347, 375)                  | 3.5<br>(3.3, 3.6)          | 862<br>(753, 979)                  | 4.6<br>(4, 5.3)              | 33.8<br>(16, 52.9)              |
| Dominica                         | 3<br>(3, 3)                        | 3.9<br>(3.6, 4.2)          | 4<br>(3, 4)                        | 4<br>(3.6, 4.5)              | 4.2<br>(-8.3, 16.6)             |
| Dominican Republic               | 59<br>(53, 66)                     | 1.5<br>(1.4, 1.7)          | 172<br>(145, 200)                  | 1.9<br>(1.6, 2.2)            | 22.6<br>(0.5, 48.8)             |
| Grenada                          | 4<br>(4, 5)                        | 6.2<br>(5.7, 6.6)          | 8<br>(7, 9)                        | 5.5<br>(5, 6.1)              | -10.2<br>(-20.8, 0.9)           |
| Guyana                           | 7<br>(6, 7)                        | 1.8<br>(1.7, 1.9)          | 10<br>(9, 12)                      | 1.6<br>(1.4, 1.9)            | -7.4<br>(-19.7, 6.9)            |
| Haiti                            | 148<br>(112, 191)                  | 4.5<br>(3.4, 5.8)          | 229<br>(169, 315)                  | 3.5<br>(2.6, 4.8)            | -22.9<br>(-40.1, 0.8)           |
| Jamaica                          | 53<br>(49, 58)                     | 2.9<br>(2.7, 3.2)          | 88<br>(73, 104)                    | 3.1<br>(2.6, 3.6)            | 5.3<br>(-13.2, 27.1)            |
| Puerto Rico                      | 218<br>(209, 228)                  | 5.9<br>(5.6, 6.1)          | 149<br>(135, 164)                  | 2.2<br>(2, 2.4)              | -63.2<br>(-66.8, -59)           |
| Saint Lucia                      | 4<br>(4, 5)                        | 4.7<br>(4.4, 5)            | 8<br>(7, 9)                        | 3.7<br>(3.4, 4.1)            | -20.7<br>(-29.8, -10.1)         |
| Saint Vincent and the Grenadines | 1<br>(1, 2)                        | 2<br>(1.9, 2.2)            | 3<br>(3, 4)                        | 2.3<br>(2.1, 2.6)            | 14.2<br>(-2, 32.1)              |
| Suriname                         | 3<br>(3, 4)                        | 1.3<br>(1.2, 1.4)          | 8<br>(7, 9)                        | 1.3<br>(1.2, 1.5)            | -0.2<br>(-15.3, 16.8)           |
| Trinidad and Tobago              | 20<br>(18, 21)                     | 2.3<br>(2.1, 2.5)          | 25<br>(20, 31)                     | 1.4<br>(1.1, 1.7)            | -39.6<br>(-51.5, -24.3)         |
| Virgin Islands                   | 3<br>(3, 3)                        | 3.4<br>(3, 3.8)            | 7<br>(6, 8)                        | 3.9<br>(3.1, 4.4)            | 14.4<br>(-8.7, 35.8)            |
| <b>Tropical Latin America</b>    | <b>5349<br/>(5237, 5464)</b>       | <b>5.7<br/>(5.6, 5.8)</b>  | <b>10981<br/>(10709, 11257)</b>    | <b>4.6<br/>(4.5, 4.8)</b>    | <b>-18.2<br/>(-20.6, -15.8)</b> |
| Brazil                           | 5281<br>(5170, 5394)               | 5.7<br>(5.6, 5.9)          | 10801<br>(10536, 11086)            | 4.7<br>(4.6, 4.8)            | -18.6<br>(-21, -16.1)           |
| Paraguay                         | 69<br>(61, 75)                     | 3.2<br>(2.9, 3.5)          | 179<br>(146, 219)                  | 3.4<br>(2.8, 4.2)            | 8.5<br>(-12.4, 36)              |
| <b>East Asia</b>                 | <b>169650<br/>(162162, 179419)</b> | <b>18.9<br/>(18.1, 20)</b> | <b>244509<br/>(232910, 256226)</b> | <b>12.1<br/>(11.5, 12.7)</b> | <b>-36.1<br/>(-40.9, -31.3)</b> |
| China                            | 164473<br>(157194, 173853)         | 19.4<br>(18.5, 20.5)       | 234624<br>(223240, 246036)         | 12.2<br>(11.6, 12.8)         | -36.9<br>(-41.7, -32.1)         |
| North Korea                      | 1446<br>(1155, 1762)               | 8.7<br>(7, 10.5)           | 2575<br>(1934, 3195)               | 8.1<br>(6.1, 10.1)           | -6.2<br>(-27.2, 18.8)           |
| Taiwan (Province of China)       | 905<br>(874, 940)                  | 5.5<br>(5.3, 5.7)          | 3372<br>(3003, 3813)               | 8.9<br>(7.9, 10.1)           | 62.5<br>(43.4, 85.4)            |
| <b>Southeast Asia</b>            | <b>7898<br/>(7074, 8600)</b>       | <b>3.1<br/>(2.7, 3.3)</b>  | <b>14755<br/>(13824, 15840)</b>    | <b>2.5<br/>(2.4, 2.7)</b>    | <b>-18.1<br/>(-25.9, -6.4)</b>  |
| Cambodia                         | 212<br>(179, 247)                  | 4.5<br>(3.8, 5.2)          | 289<br>(238, 354)                  | 2.5<br>(2.1, 3.1)            | -43.4<br>(-54.6, -29.3)         |
| Indonesia                        | 920<br>(829, 1049)                 | 0.9<br>(0.8, 1.1)          | 1700<br>(1578, 1825)               | 0.8<br>(0.7, 0.9)            | -12.9<br>(-26, -0.5)            |
| Laos                             | 101<br>(81, 121)                   | 4.7<br>(3.8, 5.5)          | 105<br>(80, 134)                   | 2.5<br>(1.9, 3.1)            | -46.7<br>(-58.4, -32.6)         |
| Malaysia                         | 253<br>(232, 276)                  | 2.9<br>(2.6, 3.1)          | 648<br>(576, 740)                  | 2.6<br>(2.4, 3)              | -7.3<br>(-21.3, 11.4)           |
| Maldives                         | 3<br>(2, 4)                        | 3.6<br>(2.7, 4.4)          | 4<br>(4, 4)                        | 1.5<br>(1.3, 1.6)            | -59.2<br>(-67.9, -43.1)         |
| Mauritius                        | 22<br>(21, 23)                     | 3<br>(2.8, 3.2)            | 36<br>(33, 40)                     | 2.2<br>(2, 2.4)              | -26.1<br>(-33.9, -17.6)         |
| Myanmar                          | 2875<br>(2299, 3496)               | 12.3<br>(9.9, 14.9)        | 3948<br>(3439, 4599)               | 8.9<br>(7.8, 10.3)           | -27.4<br>(-43.5, -6.8)          |
| Philippines                      | 427<br>(400, 455)                  | 1.4<br>(1.3, 1.5)          | 882<br>(765, 1001)                 | 1.2<br>(1.1, 1.4)            | -11.6<br>(-23.6, 2.5)           |

|                                     |                                    |                               |                                    |                                 |                                       |
|-------------------------------------|------------------------------------|-------------------------------|------------------------------------|---------------------------------|---------------------------------------|
| Sri Lanka                           | 500<br>(454, 547)                  | 4.5<br>(4.1, 4.9)             | 969<br>(809, 1163)                 | 3.9<br>(3.3, 4.7)               | -12.7<br>(-29.1, 7.4)                 |
| Seychelles                          | 3<br>(3, 4)                        | 6<br>(5.4, 6.6)               | 6<br>(5, 6)                        | 5.1<br>(4.6, 5.6)               | -14.8<br>(-26.8, -1.6)                |
| Thailand                            | 1075<br>(985, 1171)                | 3<br>(2.8, 3.3)               | 2942<br>(2576, 3346)               | 2.9<br>(2.6, 3.3)               | -2.5<br>(-16.5, 14.1)                 |
| East Timor                          | 9<br>(7, 11)                       | 3.1<br>(2.5, 3.7)             | 16<br>(13, 21)                     | 2.1<br>(1.6, 2.7)               | -31.9<br>(-47.3, -13.7)               |
| Vietnam                             | 1488<br>(1222, 1774)               | 3.7<br>(3, 4.3)               | 3190<br>(2669, 3918)               | 3.4<br>(2.9, 4.1)               | -7.7<br>(-29.2, 24)                   |
| <b>Oceania</b>                      | <b>68</b><br><b>(59, 79)</b>       | <b>2.3</b><br><b>(2, 2.6)</b> | <b>145</b><br><b>(123, 171)</b>    | <b>2.2</b><br><b>(1.9, 2.5)</b> | <b>-2.2</b><br><b>(-13.5, 10.6)</b>   |
| American Samoa                      | 0<br>(0, 0)                        | 1.2<br>(1, 1.3)               | 1<br>(0, 1)                        | 1.3<br>(1.1, 1.5)               | 13.4<br>(-6.8, 35.5)                  |
| Federated States of Micronesia      | 1<br>(1, 1)                        | 2.4<br>(2, 2.8)               | 1<br>(1, 2)                        | 2.1<br>(1.7, 2.5)               | -12.3<br>(-30.6, 9.6)                 |
| Fiji                                | 6<br>(6, 7)                        | 1.9<br>(1.6, 2.1)             | 16<br>(14, 19)                     | 2.4<br>(2.1, 2.7)               | 29.7<br>(4.9, 60)                     |
| Guam                                | 1<br>(1, 2)                        | 1.9<br>(1.7, 2.1)             | 5<br>(4, 5)                        | 2.5<br>(2.2, 2.8)               | 32.4<br>(12.1, 54.9)                  |
| Kiribati                            | 1<br>(1, 1)                        | 3.6<br>(3.2, 4)               | 3<br>(2, 3)                        | 4.2<br>(3.6, 4.9)               | 15.4<br>(-4.7, 40.1)                  |
| Marshall Islands                    | 1<br>(0, 1)                        | 3.2<br>(2.7, 3.8)             | 1<br>(1, 1)                        | 3.2<br>(2.7, 3.9)               | 1<br>(-16.3, 22.1)                    |
| Northern Mariana Islands            | 0<br>(0, 0)                        | 1.4<br>(1.2, 1.7)             | 1<br>(1, 1)                        | 1.7<br>(1.5, 2)                 | 18.5<br>(-5.1, 45.9)                  |
| Papua New Guinea                    | 45<br>(37, 55)                     | 2.3<br>(1.9, 2.8)             | 96<br>(76, 121)                    | 2.1<br>(1.7, 2.6)               | -8.7<br>(-24.4, 9.9)                  |
| Samoa                               | 1<br>(1, 2)                        | 1.5<br>(1.2, 1.9)             | 2<br>(2, 3)                        | 1.5<br>(1.2, 2)                 | 0.7<br>(-19.2, 23.6)                  |
| Solomon Islands                     | 3<br>(3, 4)                        | 2.4<br>(1.9, 2.9)             | 7<br>(5, 8)                        | 2.2<br>(1.7, 2.6)               | -8.6<br>(-24.9, 10.5)                 |
| Tonga                               | 1<br>(1, 1)                        | 2.2<br>(1.9, 2.6)             | 2<br>(2, 2)                        | 2.4<br>(2, 2.8)                 | 5.3<br>(-14.4, 31.4)                  |
| Vanuatu                             | 1<br>(1, 2)                        | 2.1<br>(1.5, 2.6)             | 3<br>(2, 4)                        | 2.1<br>(1.6, 2.6)               | 0<br>(-20.7, 26)                      |
| <b>North Africa and Middle East</b> | <b>4763</b><br><b>(4261, 5246)</b> | <b>2.7</b><br><b>(2.4, 3)</b> | <b>9080</b><br><b>(8456, 9833)</b> | <b>2.2</b><br><b>(2, 2.4)</b>   | <b>-19.2</b><br><b>(-25.2, -11.6)</b> |
| Afghanistan                         | 698<br>(417, 920)                  | 9.6<br>(5.9, 12.6)            | 889<br>(682, 1113)                 | 8.1<br>(6.3, 10.3)              | -15.7<br>(-34.6, 35.3)                |
| Algeria                             | 133<br>(118, 148)                  | 1.1<br>(1, 1.2)               | 305<br>(273, 339)                  | 0.9<br>(0.9, 1.1)               | -11.5<br>(-24.6, 2)                   |
| Bahrain                             | 6<br>(5, 7)                        | 3.6<br>(3.2, 3.9)             | 10<br>(9, 12)                      | 1.2<br>(1, 1.3)                 | -67.1<br>(-71.7, -61.6)               |
| Egypt                               | 440<br>(401, 482)                  | 1.5<br>(1.4, 1.7)             | 1068<br>(939, 1219)                | 1.8<br>(1.6, 2)                 | 16.5<br>(-0.9, 35.9)                  |
| Iran                                | 1252<br>(1155, 1371)               | 4.9<br>(4.5, 5.4)             | 2661<br>(2560, 2822)               | 4<br>(3.9, 4.2)                 | -18.3<br>(-25.1, -11)                 |
| Iraq                                | 117<br>(99, 136)                   | 1.5<br>(1.3, 1.7)             | 154<br>(140, 170)                  | 0.6<br>(0.6, 0.7)               | -56<br>(-63.5, -46.7)                 |
| Jordan                              | 18<br>(15, 20)                     | 1.2<br>(1.1, 1.4)             | 56<br>(47, 65)                     | 1<br>(0.9, 1.1)                 | -18.3<br>(-32.9, 1.8)                 |
| Kuwait                              | 10<br>(9, 10)                      | 1.5<br>(1.4, 1.6)             | 24<br>(22, 27)                     | 1<br>(0.9, 1.1)                 | -32.2<br>(-40.2, -23.5)               |
| Lebanon                             | 30<br>(25, 36)                     | 1.4<br>(1.1, 1.6)             | 71<br>(62, 81)                     | 1.2<br>(1.1, 1.4)               | -11.5<br>(-28.2, 16.2)                |
| Libya                               | 26<br>(21, 31)                     | 1.3<br>(1.1, 1.6)             | 77<br>(62, 94)                     | 1.7<br>(1.4, 2)                 | 25<br>(-5.3, 61.9)                    |
| Morocco                             | 192<br>(167, 219)                  | 1.3<br>(1.1, 1.5)             | 389<br>(323, 459)                  | 1.2<br>(1, 1.4)                 | -6<br>(-25, 18.8)                     |
| Palestine                           | 11<br>(9, 14)                      | 1.3<br>(1, 1.5)               | 23<br>(20, 25)                     | 0.9<br>(0.8, 1)                 | -26<br>(-40.2, -8)                    |

|                                    |                                       |                                    |                                       |                                 |                                       |
|------------------------------------|---------------------------------------|------------------------------------|---------------------------------------|---------------------------------|---------------------------------------|
| Oman                               | 18<br>(15, 22)                        | 2.6<br>(2.1, 3.2)                  | 45<br>(36, 54)                        | 2.3<br>(1.9, 2.7)               | -13.7<br>(-34.1, 12.1)                |
| Qatar                              | 5<br>(4, 5)                           | 4.8<br>(4.1, 5.5)                  | 16<br>(13, 19)                        | 2.2<br>(1.8, 2.6)               | -53.6<br>(-63.8, -40.9)               |
| Saudi Arabia                       | 126<br>(104, 154)                     | 2.1<br>(1.7, 2.5)                  | 298<br>(255, 355)                     | 2<br>(1.7, 2.3)                 | -5.7<br>(-25.4, 20)                   |
| Sudan                              | 462<br>(333, 638)                     | 4.9<br>(3.5, 6.9)                  | 787<br>(554, 1065)                    | 4.4<br>(3.1, 6)                 | -8.9<br>(-29.3, 16)                   |
| Syria                              | 52<br>(46, 61)                        | 1<br>(0.9, 1.1)                    | 122<br>(98, 149)                      | 1<br>(0.8, 1.2)                 | -1.7<br>(-24.7, 27.3)                 |
| Tunisia                            | 42<br>(38, 46)                        | 0.9<br>(0.8, 0.9)                  | 102<br>(81, 124)                      | 0.9<br>(0.7, 1)                 | 0.2<br>(-21.6, 25.8)                  |
| Turkey                             | 848<br>(763, 943)                     | 2.2<br>(2, 2.5)                    | 1139<br>(1034, 1257)                  | 1.3<br>(1.2, 1.4)               | -42.1<br>(-49.9, -33.3)               |
| United Arab Emirates               | 29<br>(20, 39)                        | 6.1<br>(4.3, 8.4)                  | 344<br>(251, 469)                     | 8.5<br>(6.3, 11.7)              | 38.5<br>(4, 88.9)                     |
| Yemen                              | 246<br>(162, 347)                     | 4.8<br>(3.2, 6.9)                  | 493<br>(361, 659)                     | 3.9<br>(2.9, 5.1)               | -19.1<br>(-42.3, 17.1)                |
| <b>South Asia</b>                  | <b>27371</b><br><b>(25764, 28932)</b> | <b>4.5</b><br><b>(4.2, 4.8)</b>    | <b>53022</b><br><b>(50092, 56177)</b> | <b>3.9</b><br><b>(3.7, 4.2)</b> | <b>-12.3</b><br><b>(-18.4, -4.7)</b>  |
| Bangladesh                         | 2096<br>(1841, 2447)                  | 4.2<br>(3.7, 4.9)                  | 2959<br>(2550, 3402)                  | 2.5<br>(2.2, 2.9)               | -39.2<br>(-50.9, -26)                 |
| Bhutan                             | 20<br>(16, 24)                        | 7.5<br>(6.2, 9.2)                  | 26<br>(21, 33)                        | 4.3<br>(3.5, 5.4)               | -42.6<br>(-57.4, -23.5)               |
| India                              | 20479<br>(19243, 21660)               | 4.1<br>(3.9, 4.4)                  | 40072<br>(37723, 42361)               | 3.7<br>(3.4, 3.9)               | -11.5<br>(-17.3, -4.5)                |
| Nepal                              | 620<br>(524, 745)                     | 6.2<br>(5.2, 7.5)                  | 1062<br>(872, 1267)                   | 4.9<br>(4.1, 5.8)               | -20.2<br>(-35.1, -3.5)                |
| Pakistan                           | 4157<br>(3649, 4744)                  | 7.1<br>(6.3, 8.1)                  | 8903<br>(7372, 10647)                 | 7.8<br>(6.5, 9.4)               | 10.1<br>(-11.9, 36.9)                 |
| <b>Southern sub-Saharan Africa</b> | <b>3553</b><br><b>(3276, 3855)</b>    | <b>12.3</b><br><b>(11.3, 13.4)</b> | <b>5484</b><br><b>(5205, 5746)</b>    | <b>10</b><br><b>(9.5, 10.4)</b> | <b>-19.1</b><br><b>(-26.1, -10.7)</b> |
| Botswana                           | 69<br>(55, 85)                        | 11.6<br>(9.4, 14.1)                | 99<br>(83, 118)                       | 7.5<br>(6.4, 9)                 | -35<br>(-48.2, -17.8)                 |
| Lesotho                            | 134<br>(114, 155)                     | 13.2<br>(11.2, 15.2)               | 168<br>(141, 197)                     | 13.9<br>(11.6, 16.2)            | 5.5<br>(-14.9, 29.1)                  |
| Namibia                            | 27<br>(23, 31)                        | 3.6<br>(3.1, 4.1)                  | 41<br>(35, 48)                        | 2.9<br>(2.5, 3.3)               | -20<br>(-34.5, -2.8)                  |
| South Africa                       | 2725<br>(2497, 2975)                  | 12.4<br>(11.3, 13.5)               | 4133<br>(3950, 4323)                  | 9.5<br>(9, 9.9)                 | -23.4<br>(-30.4, -15.2)               |
| Swaziland                          | 54<br>(44, 66)                        | 17.6<br>(14.3, 21.4)               | 86<br>(67, 106)                       | 14.9<br>(11.6, 18.1)            | -15.6<br>(-35.1, 6.8)                 |
| Zimbabwe                           | 545<br>(467, 627)                     | 12.8<br>(11.1, 14.7)               | 958<br>(806, 1130)                    | 13.8<br>(11.8, 16.3)            | 7.7<br>(-14.1, 35.5)                  |
| <b>Western sub-Saharan Africa</b>  | <b>2609</b><br><b>(2277, 3055)</b>    | <b>2.9</b><br><b>(2.6, 3.4)</b>    | <b>6901</b><br><b>(6007, 8208)</b>    | <b>4</b><br><b>(3.5, 4.7)</b>   | <b>35.7</b><br><b>(15.6, 58.9)</b>    |
| Benin                              | 73<br>(64, 84)                        | 3.6<br>(3.1, 4.1)                  | 286<br>(228, 362)                     | 6.3<br>(5.1, 7.8)               | 74.6<br>(38.9, 124.2)                 |
| Burkina Faso                       | 253<br>(199, 297)                     | 6.2<br>(4.9, 7.2)                  | 519<br>(438, 608)                     | 6.4<br>(5.4, 7.4)               | 3.3<br>(-17.8, 34.1)                  |
| Cameroon                           | 201<br>(155, 236)                     | 4.4<br>(3.4, 5.2)                  | 759<br>(584, 938)                     | 6.8<br>(5.3, 8.3)               | 52.6<br>(18.5, 92.7)                  |
| Cape Verde                         | 18<br>(16, 19)                        | 7.7<br>(7, 8.4)                    | 44<br>(38, 50)                        | 10.1<br>(8.9, 11.5)             | 30.7<br>(9.3, 52.7)                   |
| Chad                               | 82<br>(69, 97)                        | 2.9<br>(2.4, 3.4)                  | 279<br>(220, 352)                     | 5.3<br>(4.2, 6.6)               | 84.1<br>(46.4, 128.9)                 |
| Côte d'Ivoire                      | 42<br>(36, 49)                        | 1<br>(0.9, 1.2)                    | 125<br>(101, 155)                     | 1.3<br>(1, 1.6)                 | 21.2<br>(-4.7, 52.2)                  |
| The Gambia                         | 7<br>(6, 8)                           | 1.9<br>(1.5, 2.2)                  | 19<br>(16, 23)                        | 2.1<br>(1.7, 2.5)               | 12.1<br>(-11.2, 41.7)                 |
| Ghana                              | 213<br>(179, 254)                     | 3.4<br>(2.9, 4)                    | 573<br>(491, 659)                     | 3.8<br>(3.3, 4.4)               | 13.3<br>(-9.9, 42.1)                  |



|                                   |                              |                             |                                 |                           |                                 |
|-----------------------------------|------------------------------|-----------------------------|---------------------------------|---------------------------|---------------------------------|
| Guinea                            | 60<br>(53, 67)               | 1.7<br>(1.5, 2)             | 124<br>(101, 151)               | 2.3<br>(1.9, 2.8)         | 32.2<br>(6.5, 65.6)             |
| Guinea-Bissau                     | 22<br>(18, 26)               | 5.3<br>(4.5, 6.2)           | 56<br>(45, 71)                  | 8<br>(6.5, 10)            | 51.8<br>(20.3, 96.4)            |
| Liberia                           | 44<br>(37, 51)               | 3.8<br>(3.2, 4.4)           | 107<br>(85, 133)                | 5.7<br>(4.6, 7)           | 50.1<br>(19.7, 91.4)            |
| Mali                              | 107<br>(94, 122)             | 2.5<br>(2.2, 2.9)           | 193<br>(159, 236)               | 2.3<br>(1.9, 2.8)         | -9<br>(-25.4, 12.1)             |
| Mauritania                        | 44<br>(36, 55)               | 4.3<br>(3.5, 5.2)           | 96<br>(73, 122)                 | 5<br>(3.8, 6.3)           | 17.1<br>(-7.1, 44.3)            |
| Niger                             | 91<br>(68, 112)              | 3.1<br>(2.4, 3.8)           | 304<br>(237, 377)               | 4.3<br>(3.4, 5.2)         | 35.4<br>(8.5, 69.7)             |
| Nigeria                           | 1137<br>(856, 1529)          | 2.5<br>(1.9, 3.3)           | 2736<br>(1967, 3911)            | 3.5<br>(2.5, 4.9)         | 36.9<br>(-1.7, 93)              |
| São Tomé and Príncipe             | 2<br>(1, 2)                  | 2.3<br>(1.8, 2.8)           | 4<br>(3, 5)                     | 4.2<br>(3.1, 5.3)         | 83.7<br>(34, 145.3)             |
| Senegal                           | 115<br>(96, 141)             | 3.5<br>(2.9, 4.3)           | 347<br>(281, 446)               | 4.9<br>(4, 6.3)           | 40.6<br>(14, 69.8)              |
| Sierra Leone                      | 60<br>(45, 72)               | 3<br>(2.3, 3.6)             | 164<br>(132, 200)               | 4.9<br>(4, 6)             | 61.4<br>(23.9, 109.9)           |
| Togo                              | 39<br>(33, 46)               | 3.1<br>(2.6, 3.6)           | 165<br>(129, 211)               | 4.8<br>(3.8, 6.1)         | 54.4<br>(22.4, 92.7)            |
| <b>Eastern sub-Saharan Africa</b> | <b>8050<br/>(7274, 8878)</b> | <b>10.7<br/>(9.8, 11.8)</b> | <b>11842<br/>(10911, 13029)</b> | <b>7.8<br/>(7.2, 8.6)</b> | <b>-27.4<br/>(-34.7, -19)</b>   |
| Burundi                           | 416<br>(338, 533)            | 18.7<br>(15.4, 23.9)        | 355<br>(286, 438)               | 8.9<br>(7.3, 10.8)        | -52.3<br>(-62.8, -39.5)         |
| Comoros                           | 32<br>(25, 41)               | 15.3<br>(12.1, 20)          | 35<br>(29, 42)                  | 8.1<br>(6.7, 9.6)         | -47.2<br>(-59.2, -32.5)         |
| Djibouti                          | 19<br>(13, 31)               | 12.8<br>(8.9, 20.1)         | 44<br>(30, 64)                  | 8.2<br>(5.7, 11.7)        | -36.4<br>(-58.2, -7)            |
| Eritrea                           | 182<br>(139, 235)            | 18.3<br>(14.6, 23.1)        | 218<br>(177, 263)               | 9.8<br>(8, 11.6)          | -46.8<br>(-58.9, -31.8)         |
| Ethiopia                          | 1812<br>(1497, 2169)         | 9.8<br>(8.2, 11.5)          | 1770<br>(1584, 1984)            | 4.9<br>(4.4, 5.5)         | -50.2<br>(-60.4, -37.8)         |
| Kenya                             | 733<br>(575, 973)            | 8.8<br>(6.9, 11.6)          | 1624<br>(1337, 2063)            | 7.9<br>(6.5, 10.2)        | -9.8<br>(-17.8, -1.6)           |
| Madagascar                        | 603<br>(509, 725)            | 11.4<br>(9.6, 13.6)         | 754<br>(605, 921)               | 7.3<br>(6, 8.8)           | -35.6<br>(-49.2, -19.9)         |
| Malawi                            | 922<br>(573, 1134)           | 21.7<br>(14.3, 26.2)        | 1736<br>(1459, 2006)            | 23<br>(19.4, 26.5)        | 6<br>(-18.3, 64.8)              |
| Mozambique                        | 426<br>(367, 490)            | 7.3<br>(6.3, 8.3)           | 780<br>(653, 940)               | 7.5<br>(6.3, 8.9)         | 2.8<br>(-15.3, 26.3)            |
| Rwanda                            | 468<br>(297, 568)            | 15.7<br>(10, 19)            | 361<br>(254, 452)               | 6.6<br>(4.7, 8.2)         | -58<br>(-65.9, -47.4)           |
| Somalia                           | 427<br>(263, 617)            | 16.2<br>(10.9, 22.4)        | 645<br>(482, 833)               | 10.5<br>(7.9, 13.4)       | -35.5<br>(-54.8, -0.4)          |
| South Sudan                       | 410<br>(264, 614)            | 17.1<br>(11.6, 24.7)        | 423<br>(309, 568)               | 11.5<br>(8.7, 15.3)       | -32.4<br>(-53, 1.5)             |
| Tanzania                          | 564<br>(440, 688)            | 5.5<br>(4.4, 6.6)           | 941<br>(802, 1103)              | 4.3<br>(3.6, 5)           | -22.9<br>(-37.7, -2.5)          |
| Uganda                            | 823<br>(697, 971)            | 12.4<br>(10.6, 14.5)        | 1814<br>(1525, 2138)            | 13.3<br>(11.3, 15.6)      | 7.1<br>(-13.8, 32.2)            |
| Zambia                            | 209<br>(170, 241)            | 7.8<br>(6.5, 8.9)           | 334<br>(286, 385)               | 5.8<br>(5, 6.6)           | -25.9<br>(-39.3, -8.1)          |
| <b>Central sub-Saharan Africa</b> | <b>2427<br/>(2099, 2798)</b> | <b>10.4<br/>(9, 11.9)</b>   | <b>3653<br/>(3100, 4260)</b>    | <b>7.3<br/>(6.2, 8.5)</b> | <b>-30.1<br/>(-41.2, -18.5)</b> |
| Angola                            | 511<br>(394, 636)            | 12.4<br>(9.9, 15.3)         | 888<br>(730, 1055)              | 8.4<br>(7, 9.8)           | -32.6<br>(-48.5, -11.7)         |
| Central African Republic          | 167<br>(136, 196)            | 13.6<br>(11.2, 16.1)        | 216<br>(166, 274)               | 9.8<br>(7.7, 12.4)        | -28.2<br>(-42.6, -9.9)          |
| Congo                             | 161<br>(135, 193)            | 14.2<br>(12.1, 17)          | 218<br>(173, 271)               | 8.9<br>(7.3, 10.9)        | -37.6<br>(-49.2, -23.6)         |

|                   |                      |                      |                      |                    |                         |
|-------------------|----------------------|----------------------|----------------------|--------------------|-------------------------|
| DR Congo          | 1492<br>(1209, 1811) | 9.3<br>(7.7, 11.2)   | 2198<br>(1718, 2745) | 6.6<br>(5.2, 8.2)  | -29.4<br>(-45, -12)     |
| Equatorial Guinea | 31<br>(25, 38)       | 15.1<br>(12.1, 18.6) | 44<br>(31, 61)       | 9.8<br>(7.1, 13.4) | -34.9<br>(-53.3, -10.9) |
| Gabon             | 65<br>(50, 79)       | 11.3<br>(8.7, 13.6)  | 89<br>(68, 107)      | 8.5<br>(6.6, 10.2) | -24.9<br>(-39.1, -6.5)  |

**Appendix Table 3: Deaths due to oesophageal cancer in 1990 and 2017 for both sexes and percentage change of age-standardised rates per 100 000 by location**

|                                  | 1990                              |                          | 2017                              |                          | Percentage change in age-standardised rates between 1990 and 2017 |
|----------------------------------|-----------------------------------|--------------------------|-----------------------------------|--------------------------|-------------------------------------------------------------------|
|                                  | Counts (95% UI)                   | Rate (95% UI)            | Counts (95% UI)                   | Rate (95% UI)            |                                                                   |
| <b>Global</b>                    | <b>311289</b><br>(301451, 323235) | <b>7.7</b><br>(7.5, 8)   | <b>435959</b><br>(424994, 447580) | <b>5.5</b><br>(5.3, 5.6) | <b>-29</b><br>(-32, -25.8)                                        |
| <b>High-income North America</b> | <b>12354</b><br>(12218, 12523)    | <b>3.5</b><br>(3.5, 3.5) | <b>21211</b><br>(20594, 21780)    | <b>3.5</b><br>(3.4, 3.6) | <b>-0.7</b><br>(-3.8, 2.3)                                        |
| Canada                           | 1206<br>(1171, 1241)              | 3.6<br>(3.5, 3.7)        | 2388<br>(2202, 2599)              | 3.5<br>(3.3, 3.8)        | -2.8<br>(-10.8, 6.7)                                              |
| Greenland                        | 5<br>(4, 5)                       | 14<br>(12.8, 15.3)       | 8<br>(7, 8)                       | 11.4<br>(10.3, 12.6)     | -18.5<br>(-28.6, -7.2)                                            |
| USA                              | 11143<br>(11013, 11301)           | 3.5<br>(3.4, 3.5)        | 18815<br>(18236, 19357)           | 3.5<br>(3.3, 3.6)        | -0.7<br>(-4, 2.5)                                                 |
| <b>Australasia</b>               | <b>975</b><br>(949, 1002)         | <b>4</b><br>(3.9, 4.2)   | <b>1855</b><br>(1682, 2032)       | <b>3.8</b><br>(3.4, 4.1) | <b>-6.6</b><br>(-15.5, 3)                                         |
| Australia                        | 794<br>(769, 819)                 | 4<br>(3.8, 4.1)          | 1582<br>(1414, 1757)              | 3.8<br>(3.4, 4.3)        | -3.4<br>(-14.1, 8.1)                                              |
| New Zealand                      | 181<br>(172, 191)                 | 4.5<br>(4.2, 4.7)        | 273<br>(252, 298)                 | 3.5<br>(3.2, 3.8)        | -21<br>(-28, -13)                                                 |
| <b>High-income Asia-Pacific</b>  | <b>9441</b><br>(9314, 9582)       | <b>4.6</b><br>(4.5, 4.7) | <b>14765</b><br>(14124, 15353)    | <b>3.3</b><br>(3.1, 3.4) | <b>-28.6</b><br>(-31.9, -25.6)                                    |
| Brunei                           | 4<br>(3, 4)                       | 3.7<br>(3.4, 4.1)        | 6<br>(6, 7)                       | 2.3<br>(2, 2.5)          | -39.5<br>(-48.3, -29.2)                                           |
| Japan                            | 7780<br>(7673, 7897)              | 4.5<br>(4.4, 4.5)        | 12807<br>(12310, 13311)           | 3.7<br>(3.5, 3.8)        | -18<br>(-21.4, -14.8)                                             |
| Singapore                        | 81<br>(77, 85)                    | 3.7<br>(3.5, 3.9)        | 87<br>(79, 95)                    | 1.3<br>(1.2, 1.4)        | -65.7<br>(-69.3, -62)                                             |
| South Korea                      | 1577<br>(1515, 1644)              | 5.1<br>(4.9, 5.3)        | 1865<br>(1653, 2078)              | 2.2<br>(1.9, 2.4)        | -57.7<br>(-62.9, -52.4)                                           |
| <b>Western Europe</b>            | <b>24228</b><br>(23952, 24556)    | <b>4.2</b><br>(4.1, 4.2) | <b>30228</b><br>(29195, 31378)    | <b>3.4</b><br>(3.3, 3.5) | <b>-18.3</b><br>(-21.3, -15.2)                                    |
| Andorra                          | 2<br>(2, 2)                       | 3.5<br>(3.1, 4.2)        | 4<br>(4, 5)                       | 3.1<br>(2.6, 3.7)        | -12<br>(-29.5, 6.2)                                               |
| Austria                          | 254<br>(244, 265)                 | 2.2<br>(2.1, 2.3)        | 374<br>(346, 406)                 | 2.2<br>(2, 2.4)          | 1.3<br>(-7.6, 11.3)                                               |
| Belgium                          | 523<br>(503, 543)                 | 3.4<br>(3.3, 3.5)        | 833<br>(765, 904)                 | 3.8<br>(3.5, 4.1)        | 11<br>(1.2, 22.1)                                                 |
| Cyprus                           | 9<br>(8, 10)                      | 1.1<br>(1, 1.2)          | 21<br>(18, 24)                    | 1.1<br>(0.9, 1.2)        | -1.2<br>(-17, 19.6)                                               |
| Denmark                          | 325<br>(314, 337)                 | 4<br>(3.9, 4.2)          | 447<br>(413, 482)                 | 4<br>(3.6, 4.3)          | -1.6<br>(-9.7, 7)                                                 |
| Finland                          | 204<br>(197, 212)                 | 2.8<br>(2.7, 2.9)        | 265<br>(244, 287)                 | 2.2<br>(2, 2.4)          | -22.1<br>(-28.9, -15)                                             |
| France                           | 5652<br>(5479, 5849)              | 7<br>(6.8, 7.3)          | 4365<br>(4001, 4714)              | 3.4<br>(3.1, 3.6)        | -52.4<br>(-56.6, -47.8)                                           |
| Germany                          | 3851<br>(3736, 3965)              | 3.1<br>(3, 3.2)          | 5991<br>(5301, 6704)              | 3.4<br>(3, 3.8)          | 9.7<br>(-2.8, 24.1)                                               |
| Greece                           | 259<br>(248, 271)                 | 1.7<br>(1.6, 1.7)        | 279<br>(257, 306)                 | 1.2<br>(1.1, 1.3)        | -29.7<br>(-36.4, -22.3)                                           |
| Iceland                          | 13<br>(12, 14)                    | 4.4<br>(4.2, 4.7)        | 20<br>(18, 22)                    | 3.7<br>(3.4, 4)          | -16.2<br>(-24.6, -7.1)                                            |
| Ireland                          | 283<br>(272, 295)                 | 6.7<br>(6.5, 7)          | 401<br>(365, 436)                 | 5.5<br>(4.9, 5.9)        | -18.8<br>(-26.6, -10.9)                                           |
| Israel                           | 82<br>(78, 88)                    | 1.7<br>(1.6, 1.8)        | 153<br>(140, 168)                 | 1.3<br>(1.2, 1.4)        | -21.9<br>(-29.4, -13.4)                                           |
| Italy                            | 2508<br>(2432, 2583)              | 2.8<br>(2.7, 2.9)        | 2168<br>(1999, 2347)              | 1.5<br>(1.4, 1.6)        | -46.1<br>(-50.8, -41.3)                                           |
| Luxembourg                       | 23<br>(21, 25)                    | 4.2<br>(3.9, 4.4)        | 29<br>(26, 33)                    | 3.1<br>(2.7, 3.5)        | -26.4<br>(-36.4, -14.8)                                           |

|                               |                                       |                                 |                                      |                                 |                                       |
|-------------------------------|---------------------------------------|---------------------------------|--------------------------------------|---------------------------------|---------------------------------------|
| Malta                         | 11<br>(11, 12)                        | 2.6<br>(2.4, 2.8)               | 20<br>(18, 21)                       | 2.2<br>(2, 2.4)                 | -15.1<br>(-23.8, -4.9)                |
| Netherlands                   | 802<br>(778, 829)                     | 3.9<br>(3.8, 4.1)               | 2113<br>(1969, 2274)                 | 6.3<br>(5.8, 6.7)               | 58.6<br>(47.1, 71.7)                  |
| Norway                        | 160<br>(157, 164)                     | 2.4<br>(2.3, 2.4)               | 198<br>(188, 208)                    | 2.1<br>(2, 2.2)                 | -10.8<br>(-15.6, -5.8)                |
| Portugal                      | 607<br>(584, 631)                     | 4.4<br>(4.2, 4.6)               | 650<br>(594, 715)                    | 3<br>(2.7, 3.3)                 | -31.5<br>(-38, -23.9)                 |
| Spain                         | 1820<br>(1757, 1879)                  | 3.4<br>(3.2, 3.5)               | 2058<br>(1899, 2228)                 | 2.3<br>(2.1, 2.5)               | -32.2<br>(-38, -25.6)                 |
| Sweden                        | 386<br>(373, 399)                     | 2.5<br>(2.4, 2.5)               | 517<br>(487, 552)                    | 2.5<br>(2.3, 2.6)               | -0.3<br>(-7.1, 7)                     |
| Switzerland                   | 401<br>(387, 415)                     | 3.8<br>(3.7, 4)                 | 485<br>(445, 530)                    | 2.8<br>(2.6, 3.1)               | -25.6<br>(-32.2, -17.9)               |
| United Kingdom                | 6027<br>(5951, 6109)                  | 6.4<br>(6.3, 6.5)               | 8808<br>(8608, 9022)                 | 6.9<br>(6.7, 7)                 | 7.6<br>(4.8, 10.5)                    |
| <b>Southern Latin America</b> | <b>3388</b><br><b>(3302, 3471)</b>    | <b>7.3</b><br><b>(7.1, 7.5)</b> | <b>3584</b><br><b>(3328, 3919)</b>   | <b>4.3</b><br><b>(4, 4.7)</b>   | <b>-41.2</b><br><b>(-45.8, -35.2)</b> |
| Argentina                     | 2283<br>(2209, 2363)                  | 7<br>(6.8, 7.3)                 | 2373<br>(2128, 2679)                 | 4.4<br>(4, 5)                   | -37.3<br>(-44.1, -28.3)               |
| Chile                         | 735<br>(707, 763)                     | 7.6<br>(7.3, 7.9)               | 885<br>(796, 992)                    | 3.8<br>(3.4, 4.3)               | -50.2<br>(-55.7, -44)                 |
| Uruguay                       | 369<br>(353, 386)                     | 9.2<br>(8.8, 9.6)               | 327<br>(290, 366)                    | 5.9<br>(5.2, 6.7)               | -35.5<br>(-43.3, -26.9)               |
| <b>Eastern Europe</b>         | <b>11319</b><br><b>(11062, 11571)</b> | <b>3.9</b><br><b>(3.8, 4)</b>   | <b>10032</b><br><b>(9787, 10333)</b> | <b>2.9</b><br><b>(2.8, 3)</b>   | <b>-25.4</b><br><b>(-27.3, -23.1)</b> |
| Belarus                       | 348<br>(333, 364)                     | 2.6<br>(2.5, 2.7)               | 429<br>(385, 481)                    | 2.7<br>(2.4, 3)                 | 3.3<br>(-7.6, 16.4)                   |
| Estonia                       | 61<br>(58, 65)                        | 2.9<br>(2.7, 3.1)               | 63<br>(54, 73)                       | 2.5<br>(2.1, 3)                 | -13.2<br>(-27, 3.1)                   |
| Latvia                        | 100<br>(95, 105)                      | 2.7<br>(2.6, 2.8)               | 124<br>(109, 141)                    | 3.3<br>(2.9, 3.8)               | 23.5<br>(6.2, 41.9)                   |
| Lithuania                     | 129<br>(124, 135)                     | 2.8<br>(2.6, 2.9)               | 204<br>(188, 224)                    | 3.8<br>(3.5, 4.2)               | 39.1<br>(26.2, 54.5)                  |
| Moldova                       | 104<br>(98, 110)                      | 2.2<br>(2.1, 2.4)               | 94<br>(86, 103)                      | 1.6<br>(1.5, 1.8)               | -27.2<br>(-34.8, -19.5)               |
| Russia                        | 8382<br>(8178, 8580)                  | 4.5<br>(4.4, 4.6)               | 7093<br>(6942, 7247)                 | 3<br>(2.9, 3.1)                 | -32.8<br>(-34.5, -31)                 |
| Ukraine                       | 2195<br>(2103, 2293)                  | 3<br>(2.8, 3.1)                 | 2024<br>(1870, 2198)                 | 2.7<br>(2.5, 2.9)               | -8.8<br>(-16.6, -0.3)                 |
| <b>Central Europe</b>         | <b>4530</b><br><b>(4450, 4612)</b>    | <b>3</b><br><b>(2.9, 3)</b>     | <b>5645</b><br><b>(5431, 5865)</b>   | <b>2.7</b><br><b>(2.6, 2.8)</b> | <b>-9</b><br><b>(-12.5, -5.2)</b>     |
| Albania                       | 44<br>(40, 47)                        | 2<br>(1.9, 2.2)                 | 59<br>(48, 73)                       | 1.4<br>(1.2, 1.8)               | -30<br>(-44, -12.1)                   |
| Bosnia and Herzegovina        | 107<br>(100, 115)                     | 2.6<br>(2.5, 2.8)               | 130<br>(116, 145)                    | 2.2<br>(1.9, 2.4)               | -17.3<br>(-27.1, -6)                  |
| Bulgaria                      | 288<br>(276, 302)                     | 2.2<br>(2.2, 2.3)               | 250<br>(228, 276)                    | 1.8<br>(1.6, 2)                 | -19.3<br>(-27.4, -10.1)               |
| Croatia                       | 260<br>(247, 272)                     | 3.9<br>(3.7, 4.1)               | 217<br>(198, 236)                    | 2.6<br>(2.3, 2.8)               | -34.2<br>(-40.3, -27.5)               |
| Czech Republic                | 422<br>(408, 437)                     | 3.1<br>(3, 3.2)                 | 597<br>(550, 650)                    | 3<br>(2.8, 3.2)                 | -2.7<br>(-11.4, 6.6)                  |
| Hungary                       | 589<br>(565, 614)                     | 4<br>(3.9, 4.2)                 | 634<br>(583, 688)                    | 3.5<br>(3.2, 3.8)               | -12.8<br>(-20.4, -4.5)                |
| Macedonia                     | 25<br>(23, 28)                        | 1.3<br>(1.2, 1.5)               | 44<br>(39, 49)                       | 1.3<br>(1.2, 1.5)               | -2.5<br>(-15.2, 10.7)                 |
| Montenegro                    | 16<br>(14, 18)                        | 2.4<br>(2.2, 2.7)               | 25<br>(21, 29)                       | 2.5<br>(2.2, 2.9)               | 1.8<br>(-13.5, 21.3)                  |
| Poland                        | 1686<br>(1633, 1740)                  | 3.8<br>(3.6, 3.9)               | 2070<br>(1906, 2244)                 | 3<br>(2.8, 3.3)                 | -19.4<br>(-26.6, -12.1)               |
| Romania                       | 455<br>(435, 477)                     | 1.6<br>(1.5, 1.7)               | 814<br>(751, 884)                    | 2.4<br>(2.2, 2.6)               | 50.1<br>(37, 64)                      |

|                              |                                    |                                  |                                    |                                 |                                       |
|------------------------------|------------------------------------|----------------------------------|------------------------------------|---------------------------------|---------------------------------------|
| Serbia                       | 314<br>(283, 351)                  | 2·6<br>(2·4, 2·9)                | 391<br>(355, 433)                  | 2·5<br>(2·3, 2·8)               | -3·5<br>(-15·6, 9·8)                  |
| Slovakia                     | 222<br>(209, 235)                  | 3·7<br>(3·5, 3·9)                | 304<br>(271, 345)                  | 3·4<br>(3, 3·8)                 | -9·5<br>(-20·7, 3·4)                  |
| Slovenia                     | 102<br>(96, 107)                   | 4<br>(3·8, 4·2)                  | 109<br>(98, 120)                   | 2·6<br>(2·4, 2·9)               | -34·3<br>(-42, -26·9)                 |
| <b>Central Asia</b>          | <b>6215</b><br><b>(6062, 6366)</b> | <b>13·3</b><br><b>(13, 13·6)</b> | <b>4219</b><br><b>(4012, 4423)</b> | <b>6</b><br><b>(5·7, 6·3)</b>   | <b>-54·9</b><br><b>(-57·2, -52·3)</b> |
| Armenia                      | 64<br>(59, 69)                     | 2·4<br>(2·2, 2·6)                | 70<br>(65, 76)                     | 1·7<br>(1·6, 1·8)               | -30<br>(-36·8, -22)                   |
| Azerbaijan                   | 430<br>(407, 456)                  | 8·5<br>(8, 9)                    | 749<br>(654, 882)                  | 8·6<br>(7·5, 10·1)              | 2<br>(-12·3, 20·5)                    |
| Georgia                      | 104<br>(97, 112)                   | 1·6<br>(1·5, 1·8)                | 153<br>(140, 166)                  | 2·6<br>(2·4, 2·9)               | 59·8<br>(42, 78)                      |
| Kazakhstan                   | 2412<br>(2329, 2499)               | 19·1<br>(18·5, 19·8)             | 1110<br>(1028, 1200)               | 6·9<br>(6·4, 7·4)               | -64·1<br>(-67, -61·3)                 |
| Kyrgyzstan                   | 239<br>(225, 256)                  | 7·9<br>(7·4, 8·4)                | 144<br>(134, 155)                  | 3·6<br>(3·3, 3·9)               | -54·1<br>(-58·3, -49·8)               |
| Mongolia                     | 272<br>(228, 321)                  | 28·6<br>(24, 33·7)               | 353<br>(313, 396)                  | 20·5<br>(18·3, 23)              | -28·4<br>(-40·1, -13·8)               |
| Tajikistan                   | 292<br>(276, 308)                  | 10·4<br>(9·8, 11)                | 261<br>(230, 295)                  | 5·2<br>(4·6, 5·9)               | -49·8<br>(-56·1, -42·4)               |
| Turkmenistan                 | 623<br>(602, 644)                  | 32·4<br>(31·3, 33·4)             | 336<br>(305, 369)                  | 9·1<br>(8·2, 10)                | -71·9<br>(-74·7, -69·1)               |
| Uzbekistan                   | 1778<br>(1705, 1850)               | 15·5<br>(14·9, 16·2)             | 1043<br>(924, 1169)                | 5<br>(4·4, 5·6)                 | -67·9<br>(-71·5, -63·8)               |
| <b>Central Latin America</b> | <b>1796</b><br><b>(1766, 1827)</b> | <b>2·2</b><br><b>(2·2, 2·3)</b>  | <b>3358</b><br><b>(3205, 3497)</b> | <b>1·5</b><br><b>(1·4, 1·5)</b> | <b>-33·4</b><br><b>(-36·6, -30·3)</b> |
| Colombia                     | 614<br>(592, 634)                  | 3·7<br>(3·6, 3·9)                | 881<br>(785, 987)                  | 1·6<br>(1·5, 1·8)               | -56·1<br>(-61, -50·9)                 |
| Costa Rica                   | 48<br>(46, 51)                     | 2·8<br>(2·7, 3)                  | 90<br>(82, 99)                     | 1·9<br>(1·7, 2)                 | -34·2<br>(-41, -27·1)                 |
| El Salvador                  | 39<br>(36, 42)                     | 1·3<br>(1·2, 1·4)                | 88<br>(75, 103)                    | 1·5<br>(1·3, 1·8)               | 14·1<br>(-4·7, 35·9)                  |
| Guatemala                    | 49<br>(47, 52)                     | 1·4<br>(1·4, 1·5)                | 177<br>(158, 198)                  | 1·7<br>(1·5, 1·9)               | 17·5<br>(3·8, 34·1)                   |
| Honduras                     | 26<br>(22, 30)                     | 1·2<br>(1·1, 1·4)                | 89<br>(70, 112)                    | 1·6<br>(1·2, 2)                 | 25<br>(-3·2, 62·9)                    |
| Mexico                       | 750<br>(732, 767)                  | 1·8<br>(1·7, 1·8)                | 1445<br>(1397, 1487)               | 1·3<br>(1·3, 1·3)               | -27·3<br>(-30·1, -24·9)               |
| Nicaragua                    | 17<br>(15, 19)                     | 1·1<br>(1, 1·2)                  | 33<br>(29, 38)                     | 0·8<br>(0·7, 0·9)               | -31·5<br>(-42·1, -19)                 |
| Panama                       | 24<br>(22, 25)                     | 1·6<br>(1·5, 1·8)                | 56<br>(51, 62)                     | 1·4<br>(1·3, 1·6)               | -12·9<br>(-22·8, -1·2)                |
| Venezuela                    | 229<br>(219, 241)                  | 2·5<br>(2·4, 2·6)                | 498<br>(426, 578)                  | 1·8<br>(1·6, 2·1)               | -25·8<br>(-37·6, -13·8)               |
| <b>Andean Latin America</b>  | <b>424</b><br><b>(401, 449)</b>    | <b>2·1</b><br><b>(2, 2·3)</b>    | <b>760</b><br><b>(687, 834)</b>    | <b>1·4</b><br><b>(1·3, 1·6)</b> | <b>-32·9</b><br><b>(-39·8, -25·7)</b> |
| Bolivia                      | 99<br>(85, 114)                    | 3·2<br>(2·8, 3·7)                | 200<br>(158, 252)                  | 2·5<br>(2, 3·1)                 | -23·9<br>(-41·9, -3·4)                |
| Ecuador                      | 124<br>(118, 130)                  | 2·4<br>(2·3, 2·5)                | 207<br>(186, 232)                  | 1·5<br>(1·3, 1·6)               | -39·1<br>(-46, -31)                   |
| Peru                         | 201<br>(183, 221)                  | 1·7<br>(1·6, 1·9)                | 353<br>(301, 409)                  | 1·2<br>(1, 1·3)                 | -33<br>(-44·1, -19·5)                 |
| <b>Caribbean</b>             | <b>1000</b><br><b>(959, 1050)</b>  | <b>3·8</b><br><b>(3·7, 4)</b>    | <b>1736</b><br><b>(1598, 1900)</b> | <b>3·4</b><br><b>(3·1, 3·7)</b> | <b>-11·7</b><br><b>(-18·4, -4·4)</b>  |
| Antigua and Barbuda          | 2<br>(2, 2)                        | 3·3<br>(3·1, 3·6)                | 3<br>(3, 3)                        | 2·8<br>(2·5, 3)                 | -15·9<br>(-25·1, -4·9)                |
| The Bahamas                  | 10<br>(9, 11)                      | 6·1<br>(5·4, 6·7)                | 19<br>(16, 21)                     | 4·9<br>(4·4, 5·5)               | -18·9<br>(-31, -3·2)                  |
| Barbados                     | 17<br>(16, 18)                     | 5·6<br>(5·2, 6)                  | 20<br>(18, 22)                     | 4·1<br>(3·7, 4·6)               | -26·4<br>(-34·6, -16·4)               |

|                                  |                                          |                                  |                                          |                                    |                                       |
|----------------------------------|------------------------------------------|----------------------------------|------------------------------------------|------------------------------------|---------------------------------------|
| Belize                           | 2<br>(2, 2)                              | 1.9<br>(1.7, 2.1)                | 6<br>(5, 7)                              | 2.3<br>(2.1, 2.5)                  | 20.3<br>(5.1, 38.8)                   |
| Bermuda                          | 4<br>(4, 5)                              | 6.6<br>(6.1, 7.1)                | 5<br>(5, 6)                              | 4.2<br>(3.8, 4.7)                  | -36.1<br>(-43.4, -27.5)               |
| Cuba                             | 384<br>(370, 400)                        | 3.7<br>(3.6, 3.8)                | 887<br>(776, 1008)                       | 4.7<br>(4.1, 5.4)                  | 28<br>(11.2, 45.8)                    |
| Dominica                         | 3<br>(3, 3)                              | 4.1<br>(3.9, 4.4)                | 4<br>(4, 4)                              | 4.3<br>(3.8, 4.7)                  | 3.4<br>(-9.1, 15.6)                   |
| Dominican Republic               | 60<br>(54, 67)                           | 1.6<br>(1.4, 1.8)                | 178<br>(151, 207)                        | 2<br>(1.7, 2.3)                    | 22.5<br>(0.2, 48.4)                   |
| Grenada                          | 5<br>(4, 5)                              | 6.4<br>(6, 6.9)                  | 9<br>(8, 9)                              | 5.7<br>(5.1, 6.3)                  | -11.8<br>(-22.2, -1)                  |
| Guyana                           | 7<br>(7, 8)                              | 1.9<br>(1.7, 2)                  | 10<br>(9, 12)                            | 1.7<br>(1.5, 1.9)                  | -8<br>(-20, 6)                        |
| Haiti                            | 148<br>(112, 191)                        | 4.7<br>(3.6, 6)                  | 232<br>(171, 319)                        | 3.7<br>(2.7, 5.1)                  | -21.9<br>(-39, 2.2)                   |
| Jamaica                          | 57<br>(53, 62)                           | 3.1<br>(2.9, 3.4)                | 91<br>(77, 108)                          | 3.2<br>(2.7, 3.8)                  | 2.8<br>(-14.8, 23.3)                  |
| Puerto Rico                      | 234<br>(224, 245)                        | 6.3<br>(6, 6.6)                  | 157<br>(143, 172)                        | 2.2<br>(2, 2.4)                    | -64.7<br>(-68.2, -60.9)               |
| Saint Lucia                      | 4<br>(4, 5)                              | 4.9<br>(4.6, 5.3)                | 8<br>(7, 9)                              | 3.9<br>(3.5, 4.3)                  | -21.5<br>(-30.7, -11.2)               |
| Saint Vincent and the Grenadines | 2<br>(1, 2)                              | 2.1<br>(2, 2.3)                  | 3<br>(3, 4)                              | 2.4<br>(2.1, 2.7)                  | 12.6<br>(-2.5, 30.3)                  |
| Suriname                         | 4<br>(3, 4)                              | 1.4<br>(1.3, 1.5)                | 8<br>(7, 9)                              | 1.4<br>(1.2, 1.6)                  | -0.8<br>(-15.1, 15.6)                 |
| Trinidad and Tobago              | 21<br>(19, 22)                           | 2.4<br>(2.3, 2.6)                | 26<br>(21, 32)                           | 1.5<br>(1.2, 1.8)                  | -40.1<br>(-51.5, -25.4)               |
| Virgin Islands                   | 3<br>(3, 3)                              | 3.6<br>(3.2, 4)                  | 8<br>(6, 9)                              | 4<br>(3.3, 4.6)                    | 12.4<br>(-10, 32.6)                   |
| <b>Tropical Latin America</b>    | <b>5426</b><br><b>(5325, 5537)</b>       | <b>5.9</b><br><b>(5.8, 6.1)</b>  | <b>11256</b><br><b>(10993, 11508)</b>    | <b>4.8</b><br><b>(4.7, 4.9)</b>    | <b>-19.1</b><br><b>(-21.4, -16.8)</b> |
| Brazil                           | 5352<br>(5251, 5464)                     | 6<br>(5.9, 6.1)                  | 11065<br>(10818, 11333)                  | 4.8<br>(4.7, 5)                    | -19.4<br>(-21.8, -17.1)               |
| Paraguay                         | 73<br>(66, 80)                           | 3.5<br>(3.1, 3.8)                | 190<br>(157, 231)                        | 3.7<br>(3.1, 4.5)                  | 6.8<br>(-13.2, 33.3)                  |
| <b>East Asia</b>                 | <b>173619</b><br><b>(165927, 183613)</b> | <b>20</b><br><b>(19.1, 21.2)</b> | <b>221066</b><br><b>(210944, 231096)</b> | <b>11.1</b><br><b>(10.6, 11.6)</b> | <b>-44.6</b><br><b>(-48.9, -40.6)</b> |
| China                            | 168455<br>(160933, 178231)               | 20.5<br>(19.6, 21.7)             | 212586<br>(202673, 222654)               | 11.2<br>(10.7, 11.8)               | -45.2<br>(-49.6, -41.1)               |
| North Korea                      | 1456<br>(1168, 1773)                     | 9<br>(7.3, 11)                   | 2632<br>(1990, 3269)                     | 8.4<br>(6.4, 10.5)                 | -7<br>(-27.6, 17.1)                   |
| Taiwan (Province of China)       | 816<br>(789, 845)                        | 5.1<br>(5, 5.3)                  | 2287<br>(2120, 2472)                     | 6<br>(5.5, 6.4)                    | 16.3<br>(6.7, 25.8)                   |
| <b>Southeast Asia</b>            | <b>7930</b><br><b>(7103, 8626)</b>       | <b>3.2</b><br><b>(2.9, 3.5)</b>  | <b>14818</b><br><b>(13909, 15905)</b>    | <b>2.6</b><br><b>(2.5, 2.8)</b>    | <b>-19.3</b><br><b>(-26.9, -7.8)</b>  |
| Cambodia                         | 211<br>(177, 246)                        | 4.7<br>(3.9, 5.4)                | 292<br>(242, 358)                        | 2.7<br>(2.2, 3.3)                  | -42.6<br>(-53.7, -28.8)               |
| Indonesia                        | 911<br>(821, 1041)                       | 1<br>(0.9, 1.1)                  | 1717<br>(1592, 1843)                     | 0.8<br>(0.8, 0.9)                  | -12.6<br>(-25.9, 0)                   |
| Laos                             | 100<br>(81, 120)                         | 4.8<br>(3.9, 5.7)                | 106<br>(81, 134)                         | 2.6<br>(2, 3.3)                    | -46<br>(-57.8, -32)                   |
| Malaysia                         | 263<br>(241, 289)                        | 3.1<br>(2.8, 3.4)                | 656<br>(583, 750)                        | 2.8<br>(2.5, 3.2)                  | -10.2<br>(-24, 8.2)                   |
| Maldives                         | 3<br>(2, 4)                              | 3.7<br>(2.9, 4.6)                | 4<br>(4, 4)                              | 1.5<br>(1.3, 1.7)                  | -59.8<br>(-68.4, -44.5)               |
| Mauritius                        | 22<br>(21, 24)                           | 3.2<br>(3, 3.4)                  | 37<br>(33, 40)                           | 2.3<br>(2.1, 2.5)                  | -28.4<br>(-36.1, -20.1)               |
| Myanmar                          | 2849<br>(2286, 3454)                     | 12.9<br>(10.4, 15.5)             | 4051<br>(3525, 4689)                     | 9.5<br>(8.3, 11)                   | -26<br>(-42.2, -5.4)                  |
| Philippines                      | 424<br>(397, 452)                        | 1.5<br>(1.4, 1.6)                | 883<br>(769, 1006)                       | 1.3<br>(1.1, 1.5)                  | -12<br>(-23.6, 1.5)                   |

|                                     |                                    |                                 |                                    |                                 |                                       |
|-------------------------------------|------------------------------------|---------------------------------|------------------------------------|---------------------------------|---------------------------------------|
| Sri Lanka                           | 505<br>(459, 552)                  | 4·7<br>(4·3, 5·1)               | 953<br>(798, 1129)                 | 3·9<br>(3·3, 4·6)               | -16·3<br>(-32·2, 2·2)                 |
| Seychelles                          | 3<br>(3, 4)                        | 6·1<br>(5·5, 6·8)               | 6<br>(5, 6)                        | 5·2<br>(4·7, 5·7)               | -15·9<br>(-27·9, -3·5)                |
| Thailand                            | 1094<br>(1002, 1188)               | 3·2<br>(2·9, 3·5)               | 2868<br>(2526, 3255)               | 2·9<br>(2·5, 3·3)               | -10·2<br>(-23·1, 5)                   |
| East Timor                          | 9<br>(7, 11)                       | 3·2<br>(2·6, 3·9)               | 17<br>(13, 22)                     | 2·2<br>(1·7, 2·9)               | -30·9<br>(-46, -13·4)                 |
| Vietnam                             | 1524<br>(1256, 1808)               | 3·8<br>(3·2, 4·5)               | 3208<br>(2709, 3897)               | 3·5<br>(3, 4·2)                 | -8·9<br>(-29·5, 21·9)                 |
| <b>Oceania</b>                      | <b>66</b><br><b>(56, 77)</b>       | <b>2·3</b><br><b>(2, 2·7)</b>   | <b>140</b><br><b>(119, 165)</b>    | <b>2·3</b><br><b>(2, 2·6)</b>   | <b>-1·3</b><br><b>(-12, 10·8)</b>     |
| American Samoa                      | 0<br>(0, 0)                        | 1·3<br>(1·1, 1·4)               | 1<br>(0, 1)                        | 1·4<br>(1·2, 1·6)               | 12·4<br>(-7·2, 35·1)                  |
| Federated States of Micronesia      | 1<br>(1, 1)                        | 2·5<br>(2·1, 3)                 | 1<br>(1, 2)                        | 2·2<br>(1·9, 2·6)               | -11·5<br>(-28·9, 9·9)                 |
| Fiji                                | 6<br>(6, 7)                        | 2<br>(1·7, 2·3)                 | 17<br>(14, 19)                     | 2·6<br>(2·2, 2·9)               | 29·7<br>(5·1, 60·1)                   |
| Guam                                | 1<br>(1, 2)                        | 2<br>(1·8, 2·2)                 | 4<br>(4, 5)                        | 2·5<br>(2·3, 2·9)               | 26·9<br>(8·2, 48·2)                   |
| Kiribati                            | 1<br>(1, 1)                        | 3·8<br>(3·4, 4·3)               | 3<br>(2, 3)                        | 4·5<br>(3·8, 5·2)               | 15·9<br>(-3·9, 40·8)                  |
| Marshall Islands                    | 1<br>(0, 1)                        | 3·4<br>(2·9, 4)                 | 1<br>(1, 1)                        | 3·4<br>(2·9, 4·1)               | 1·3<br>(-15·5, 21·3)                  |
| Northern Mariana Islands            | 0<br>(0, 0)                        | 1·5<br>(1·3, 1·9)               | 1<br>(1, 1)                        | 1·7<br>(1·5, 2)                 | 12·9<br>(-9·5, 38·8)                  |
| Papua New Guinea                    | 43<br>(35, 52)                     | 2·3<br>(1·9, 2·8)               | 91<br>(72, 113)                    | 2·2<br>(1·7, 2·6)               | -7·2<br>(-22·8, 11·2)                 |
| Samoa                               | 1<br>(1, 2)                        | 1·6<br>(1·3, 2)                 | 2<br>(2, 3)                        | 1·6<br>(1·3, 2·1)               | 2·7<br>(-17·1, 25·3)                  |
| Solomon Islands                     | 3<br>(3, 4)                        | 2·4<br>(1·9, 3)                 | 7<br>(5, 8)                        | 2·3<br>(1·8, 2·8)               | -7·2<br>(-23·5, 11·4)                 |
| Tonga                               | 1<br>(1, 1)                        | 2·4<br>(2, 2·8)                 | 2<br>(2, 2)                        | 2·5<br>(2·2, 3)                 | 4·7<br>(-14·2, 30·5)                  |
| Vanuatu                             | 1<br>(1, 2)                        | 2·2<br>(1·6, 2·8)               | 3<br>(3, 4)                        | 2·2<br>(1·7, 2·8)               | 1·6<br>(-18·3, 26·8)                  |
| <b>North Africa and Middle East</b> | <b>4760</b><br><b>(4273, 5242)</b> | <b>2·8</b><br><b>(2·5, 3·1)</b> | <b>9193</b><br><b>(8552, 9938)</b> | <b>2·3</b><br><b>(2·1, 2·5)</b> | <b>-18·4</b><br><b>(-24·5, -11·1)</b> |
| Afghanistan                         | 693<br>(425, 912)                  | 9·7<br>(6·1, 12·7)              | 862<br>(667, 1078)                 | 8·3<br>(6·5, 10·6)              | -14·8<br>(-32·8, 32·3)                |
| Algeria                             | 137<br>(122, 153)                  | 1·1<br>(1, 1·3)                 | 319<br>(285, 356)                  | 1<br>(0·9, 1·1)                 | -11·5<br>(-25, 2·2)                   |
| Bahrain                             | 6<br>(6, 7)                        | 3·9<br>(3·5, 4·2)               | 10<br>(9, 12)                      | 1·3<br>(1·1, 1·4)               | -67·4<br>(-72·2, -62)                 |
| Egypt                               | 431<br>(392, 476)                  | 1·6<br>(1·4, 1·7)               | 1045<br>(921, 1191)                | 1·8<br>(1·6, 2·1)               | 16·5<br>(-0·7, 35·5)                  |
| Iran                                | 1264<br>(1174, 1379)               | 5·3<br>(4·9, 5·7)               | 2816<br>(2708, 2983)               | 4·4<br>(4·2, 4·6)               | -17·4<br>(-24·1, -10·1)               |
| Iraq                                | 118<br>(101, 137)                  | 1·5<br>(1·3, 1·8)               | 154<br>(140, 168)                  | 0·7<br>(0·6, 0·7)               | -56·1<br>(-63·4, -46·8)               |
| Jordan                              | 17<br>(15, 20)                     | 1·3<br>(1·1, 1·4)               | 56<br>(48, 65)                     | 1·1<br>(0·9, 1·2)               | -16<br>(-31·3, 4·2)                   |
| Kuwait                              | 9<br>(9, 10)                       | 1·6<br>(1·5, 1·7)               | 24<br>(22, 27)                     | 1·1<br>(1, 1·2)                 | -31·9<br>(-40·1, -22·6)               |
| Lebanon                             | 31<br>(25, 36)                     | 1·4<br>(1·2, 1·7)               | 68<br>(60, 77)                     | 1·2<br>(1·1, 1·3)               | -17·3<br>(-32·3, 8)                   |
| Libya                               | 26<br>(22, 31)                     | 1·4<br>(1·2, 1·7)               | 76<br>(62, 94)                     | 1·7<br>(1·4, 2·1)               | 24·5<br>(-5·3, 60·7)                  |
| Morocco                             | 196<br>(171, 224)                  | 1·4<br>(1·2, 1·6)               | 404<br>(335, 476)                  | 1·3<br>(1·1, 1·5)               | -4·8<br>(-24, 19·9)                   |
| Palestine                           | 12<br>(10, 14)                     | 1·3<br>(1·1, 1·6)               | 23<br>(21, 25)                     | 1<br>(0·9, 1·1)                 | -25·4<br>(-39·7, -6·9)                |

|                                    |                                       |                                    |                                       |                                 |                                      |
|------------------------------------|---------------------------------------|------------------------------------|---------------------------------------|---------------------------------|--------------------------------------|
| Oman                               | 18<br>(15, 23)                        | 2.7<br>(2.2, 3.4)                  | 43<br>(35, 52)                        | 2.3<br>(1.9, 2.8)               | -15<br>(-35, 9.5)                    |
| Qatar                              | 4<br>(4, 5)                           | 5.3<br>(4.6, 6.1)                  | 15<br>(12, 18)                        | 2.4<br>(2, 2.9)                 | -54.4<br>(-64.3, -41.9)              |
| Saudi Arabia                       | 130<br>(107, 159)                     | 2.2<br>(1.8, 2.7)                  | 288<br>(249, 341)                     | 2.1<br>(1.8, 2.4)               | -5.9<br>(-24.3, 19.7)                |
| Sudan                              | 469<br>(339, 658)                     | 5.1<br>(3.7, 7.3)                  | 806<br>(563, 1095)                    | 4.7<br>(3.3, 6.5)               | -7.6<br>(-28.3, 17.7)                |
| Syria                              | 53<br>(46, 62)                        | 1<br>(0.9, 1.2)                    | 125<br>(101, 153)                     | 1<br>(0.8, 1.2)                 | -0.8<br>(-23.9, 28.1)                |
| Tunisia                            | 42<br>(38, 47)                        | 0.9<br>(0.8, 1)                    | 105<br>(84, 128)                      | 0.9<br>(0.7, 1.1)               | -0.3<br>(-21.8, 24.8)                |
| Turkey                             | 826<br>(744, 921)                     | 2.2<br>(2, 2.5)                    | 1134<br>(1029, 1254)                  | 1.3<br>(1.2, 1.4)               | -42.5<br>(-50.1, -33.6)              |
| United Arab Emirates               | 27<br>(19, 37)                        | 6.5<br>(4.6, 8.9)                  | 315<br>(231, 432)                     | 8.9<br>(6.6, 12.2)              | 36.7<br>(2.7, 86.9)                  |
| Yemen                              | 244<br>(163, 347)                     | 5<br>(3.4, 7.4)                    | 496<br>(367, 659)                     | 4.1<br>(3.1, 5.5)               | -18.1<br>(-41.6, 18.3)               |
| <b>South Asia</b>                  | <b>27043</b><br><b>(25433, 28572)</b> | <b>4.7</b><br><b>(4.4, 5)</b>      | <b>53633</b><br><b>(50604, 56781)</b> | <b>4.1</b><br><b>(3.9, 4.4)</b> | <b>-11.6</b><br><b>(-17.9, -3.5)</b> |
| Bangladesh                         | 2072<br>(1829, 2421)                  | 4.3<br>(3.8, 5)                    | 3093<br>(2664, 3553)                  | 2.8<br>(2.4, 3.2)               | -35.7<br>(-47.9, -21.9)              |
| Bhutan                             | 20<br>(16, 24)                        | 7.8<br>(6.4, 9.5)                  | 27<br>(21, 33)                        | 4.6<br>(3.7, 5.7)               | -41.4<br>(-56.3, -21.8)              |
| India                              | 20156<br>(18926, 21299)               | 4.3<br>(4, 4.5)                    | 40584<br>(38137, 42936)               | 3.8<br>(3.6, 4.1)               | -10.8<br>(-16.7, -3.5)               |
| Nepal                              | 613<br>(517, 739)                     | 6.4<br>(5.4, 7.7)                  | 1094<br>(897, 1299)                   | 5.2<br>(4.3, 6.2)               | -18.2<br>(-33.2, -1.1)               |
| Pakistan                           | 4183<br>(3680, 4781)                  | 7.4<br>(6.5, 8.4)                  | 8834<br>(7258, 10593)                 | 8.2<br>(6.8, 9.8)               | 11.5<br>(-10.7, 38.5)                |
| <b>Southern sub-Saharan Africa</b> | <b>3549</b><br><b>(3271, 3849)</b>    | <b>12.7</b><br><b>(11.7, 13.8)</b> | <b>5639</b><br><b>(5349, 5903)</b>    | <b>10.5</b><br><b>(10, 11)</b>  | <b>-16.9</b><br><b>(-24.1, -8.4)</b> |
| Botswana                           | 71<br>(57, 87)                        | 12.3<br>(10, 14.8)                 | 103<br>(86, 123)                      | 8.2<br>(6.9, 9.7)               | -33.4<br>(-46.9, -16)                |
| Lesotho                            | 137<br>(116, 159)                     | 13.7<br>(11.7, 15.9)               | 170<br>(143, 199)                     | 14.4<br>(12.1, 16.9)            | 5<br>(-14.6, 28.6)                   |
| Namibia                            | 27<br>(24, 32)                        | 3.7<br>(3.2, 4.2)                  | 42<br>(36, 49)                        | 3<br>(2.6, 3.4)                 | -19.2<br>(-33.5, -2.6)               |
| South Africa                       | 2706<br>(2471, 2959)                  | 12.6<br>(11.5, 13.8)               | 4278<br>(4089, 4479)                  | 10<br>(9.6, 10.5)               | -20.5<br>(-27.9, -12.1)              |
| Swaziland                          | 54<br>(44, 66)                        | 18.4<br>(14.9, 22.1)               | 87<br>(68, 107)                       | 15.5<br>(12.2, 18.8)            | -15.6<br>(-34.6, 6.2)                |
| Zimbabwe                           | 554<br>(474, 637)                     | 13.5<br>(11.6, 15.4)               | 959<br>(811, 1128)                    | 14.4<br>(12.4, 17)              | 7.1<br>(-14.6, 34.1)                 |
| <b>Western sub-Saharan Africa</b>  | <b>2661</b><br><b>(2326, 3108)</b>    | <b>3.1</b><br><b>(2.7, 3.6)</b>    | <b>7050</b><br><b>(6148, 8363)</b>    | <b>4.2</b><br><b>(3.7, 5)</b>   | <b>37.2</b><br><b>(17.1, 60.3)</b>   |
| Benin                              | 75<br>(65, 86)                        | 3.8<br>(3.3, 4.3)                  | 289<br>(230, 363)                     | 6.6<br>(5.3, 8.1)               | 75.1<br>(39.6, 122.8)                |
| Burkina Faso                       | 258<br>(205, 302)                     | 6.6<br>(5.3, 7.6)                  | 524<br>(444, 615)                     | 6.8<br>(5.8, 7.9)               | 2.7<br>(-17.7, 32)                   |
| Cameroon                           | 202<br>(156, 237)                     | 4.6<br>(3.5, 5.4)                  | 769<br>(593, 951)                     | 7.1<br>(5.6, 8.7)               | 54<br>(20, 94.5)                     |
| Cape Verde                         | 19<br>(17, 21)                        | 8.2<br>(7.4, 9)                    | 46<br>(40, 52)                        | 10.6<br>(9.3, 12)               | 28.4<br>(8.3, 50)                    |
| Chad                               | 85<br>(71, 100)                       | 3<br>(2.5, 3.5)                    | 283<br>(224, 355)                     | 5.5<br>(4.4, 6.9)               | 84.9<br>(47.6, 128.4)                |
| Côte d'Ivoire                      | 41<br>(35, 48)                        | 1.1<br>(0.9, 1.3)                  | 124<br>(100, 152)                     | 1.3<br>(1.1, 1.6)               | 21.9<br>(-3.4, 52.1)                 |
| The Gambia                         | 7<br>(6, 8)                           | 1.9<br>(1.6, 2.3)                  | 20<br>(16, 23)                        | 2.2<br>(1.8, 2.6)               | 13.2<br>(-10.1, 42.6)                |
| Ghana                              | 213<br>(179, 254)                     | 3.6<br>(3, 4.2)                    | 577<br>(496, 663)                     | 4<br>(3.5, 4.6)                 | 13.3<br>(-9.2, 42)                   |



|                                   |                                    |                                    |                                       |                                 |                                       |
|-----------------------------------|------------------------------------|------------------------------------|---------------------------------------|---------------------------------|---------------------------------------|
| Guinea                            | 61<br>(54, 69)                     | 1.8<br>(1.6, 2)                    | 126<br>(103, 152)                     | 2.4<br>(2, 2.9)                 | 31.8<br>(6, 65.1)                     |
| Guinea-Bissau                     | 22<br>(18, 26)                     | 5.4<br>(4.6, 6.3)                  | 55<br>(45, 69)                        | 8.3<br>(6.8, 10.2)              | 53.1<br>(21.4, 95.5)                  |
| Liberia                           | 45<br>(38, 53)                     | 4<br>(3.4, 4.6)                    | 109<br>(87, 135)                      | 6<br>(4.9, 7.4)                 | 52.8<br>(22.8, 93.8)                  |
| Mali                              | 106<br>(93, 121)                   | 2.6<br>(2.3, 3)                    | 194<br>(160, 236)                     | 2.4<br>(2, 2.9)                 | -8.1<br>(-24, 13.8)                   |
| Mauritania                        | 44<br>(36, 55)                     | 4.4<br>(3.6, 5.3)                  | 99<br>(76, 124)                       | 5.3<br>(4.1, 6.6)               | 20.5<br>(-4, 48.2)                    |
| Niger                             | 91<br>(68, 111)                    | 3.3<br>(2.5, 4)                    | 306<br>(239, 379)                     | 4.5<br>(3.6, 5.5)               | 37.2<br>(10.5, 70.5)                  |
| Nigeria                           | 1173<br>(889, 1558)                | 2.7<br>(2.1, 3.5)                  | 2836<br>(2058, 4024)                  | 3.8<br>(2.8, 5.3)               | 39.5<br>(1.4, 94.4)                   |
| São Tomé and Príncipe             | 2<br>(1, 2)                        | 2.4<br>(1.9, 2.9)                  | 4<br>(3, 5)                           | 4.4<br>(3.2, 5.6)               | 85.8<br>(37, 147.3)                   |
| Senegal                           | 117<br>(98, 143)                   | 3.7<br>(3.1, 4.5)                  | 356<br>(292, 455)                     | 5.2<br>(4.3, 6.6)               | 42.2<br>(16.2, 70.6)                  |
| Sierra Leone                      | 62<br>(46, 74)                     | 3.2<br>(2.4, 3.8)                  | 168<br>(136, 205)                     | 5.2<br>(4.3, 6.3)               | 63.1<br>(25.7, 112.5)                 |
| Togo                              | 39<br>(33, 46)                     | 3.2<br>(2.8, 3.8)                  | 165<br>(130, 211)                     | 5<br>(4, 6.4)                   | 55.2<br>(24, 93.4)                    |
| <b>Eastern sub-Saharan Africa</b> | <b>8143</b><br><b>(7392, 8937)</b> | <b>11.4</b><br><b>(10.4, 12.5)</b> | <b>12100</b><br><b>(11150, 13251)</b> | <b>8.4</b><br><b>(7.7, 9.2)</b> | <b>-26.8</b><br><b>(-34, -18.7)</b>   |
| Burundi                           | 418<br>(342, 536)                  | 19.6<br>(16.2, 25.2)               | 360<br>(292, 445)                     | 9.6<br>(7.8, 11.6)              | -51.2<br>(-61.7, -38.6)               |
| Comoros                           | 32<br>(25, 42)                     | 16.1<br>(12.8, 21)                 | 37<br>(30, 44)                        | 8.6<br>(7.2, 10.3)              | -46.1<br>(-58.2, -31.9)               |
| Djibouti                          | 19<br>(13, 30)                     | 13.6<br>(9.5, 21.2)                | 45<br>(31, 64)                        | 8.8<br>(6.1, 12.6)              | -35.8<br>(-57.3, -6.8)                |
| Eritrea                           | 180<br>(139, 230)                  | 19.2<br>(15.4, 24.2)               | 218<br>(177, 261)                     | 10.4<br>(8.5, 12.4)             | -45.8<br>(-58.1, -31)                 |
| Ethiopia                          | 1813<br>(1510, 2163)               | 10.5<br>(8.9, 12.3)                | 1840<br>(1648, 2067)                  | 5.3<br>(4.8, 6)                 | -49.3<br>(-59.5, -37.2)               |
| Kenya                             | 743<br>(584, 987)                  | 9.2<br>(7.3, 12.2)                 | 1644<br>(1351, 2118)                  | 8.4<br>(6.9, 10.9)              | -8.8<br>(-16.5, -1)                   |
| Madagascar                        | 609<br>(514, 729)                  | 11.9<br>(10.1, 14.3)               | 760<br>(612, 928)                     | 7.8<br>(6.4, 9.4)               | -34.6<br>(-48.3, -18.7)               |
| Malawi                            | 928<br>(594, 1132)                 | 22.6<br>(15.3, 27.2)               | 1758<br>(1478, 2028)                  | 23.8<br>(20.1, 27.5)            | 5.4<br>(-17.9, 59.2)                  |
| Mozambique                        | 440<br>(380, 505)                  | 7.9<br>(6.9, 9)                    | 796<br>(669, 950)                     | 8<br>(6.8, 9.5)                 | 1.7<br>(-16.3, 24.4)                  |
| Rwanda                            | 472<br>(299, 571)                  | 16.6<br>(10.5, 19.9)               | 373<br>(264, 464)                     | 7.2<br>(5.1, 8.9)               | -56.7<br>(-64.9, -46)                 |
| Somalia                           | 423<br>(266, 606)                  | 17.1<br>(11.7, 23.5)               | 651<br>(485, 843)                     | 11.2<br>(8.5, 14.2)             | -34.8<br>(-53.9, -0.1)                |
| South Sudan                       | 418<br>(275, 619)                  | 18.1<br>(12.5, 26.2)               | 426<br>(313, 573)                     | 12.3<br>(9.3, 16.1)             | -32.2<br>(-52.4, 0.8)                 |
| Tanzania                          | 588<br>(466, 713)                  | 6.1<br>(5, 7.2)                    | 993<br>(846, 1167)                    | 4.7<br>(4, 5.5)                 | -22.7<br>(-37.2, -4)                  |
| Uganda                            | 839<br>(712, 987)                  | 13.2<br>(11.3, 15.3)               | 1844<br>(1558, 2162)                  | 14.1<br>(12, 16.4)              | 7.2<br>(-13.2, 31.7)                  |
| Zambia                            | 216<br>(178, 248)                  | 8.5<br>(7.2, 9.7)                  | 346<br>(297, 398)                     | 6.3<br>(5.5, 7.2)               | -25.7<br>(-38.6, -8.1)                |
| <b>Central sub-Saharan Africa</b> | <b>2423</b><br><b>(2096, 2793)</b> | <b>10.9</b><br><b>(9.5, 12.5)</b>  | <b>3670</b><br><b>(3113, 4279)</b>    | <b>7.7</b><br><b>(6.5, 9)</b>   | <b>-29.6</b><br><b>(-40.6, -18.1)</b> |
| Angola                            | 504<br>(391, 626)                  | 12.9<br>(10.4, 15.9)               | 887<br>(730, 1049)                    | 8.8<br>(7.4, 10.3)              | -31.7<br>(-47.4, -11.6)               |
| Central African Republic          | 165<br>(134, 194)                  | 14.2<br>(11.7, 16.7)               | 214<br>(165, 270)                     | 10.2<br>(8, 12.8)               | -27.7<br>(-41.9, -9.7)                |
| Congo                             | 161<br>(136, 193)                  | 14.8<br>(12.7, 17.6)               | 219<br>(176, 271)                     | 9.4<br>(7.8, 11.5)              | -36.3<br>(-47.9, -22.5)               |

|                   |                      |                      |                      |                     |                         |
|-------------------|----------------------|----------------------|----------------------|---------------------|-------------------------|
| DR Congo          | 1495<br>(1212, 1814) | 9.8<br>(8.1, 11.8)   | 2215<br>(1734, 2768) | 6.9<br>(5.5, 8.7)   | -29.2<br>(-44.2, -12.1) |
| Equatorial Guinea | 31<br>(25, 38)       | 15.6<br>(12.7, 19.1) | 45<br>(32, 62)       | 10.5<br>(7.7, 14.2) | -32.9<br>(-51.3, -8.6)  |
| Gabon             | 67<br>(51, 80)       | 11.8<br>(9.2, 14.2)  | 91<br>(70, 109)      | 9<br>(7.1, 10.7)    | -24.4<br>(-38.4, -6.1)  |

**Appendix Table 4: DALYs due to oesophageal cancer in 1990 and 2017 for both sexes and percentage change of age-standardised rates per 100 000 by location**

|                                  | 1990                                 |                                | 2017                                  |                              | Percentage change in age-standardised rates between 1990 and 2017 |
|----------------------------------|--------------------------------------|--------------------------------|---------------------------------------|------------------------------|-------------------------------------------------------------------|
|                                  | Counts (95% UI)                      | Rate (95% UI)                  | Counts (95% UI)                       | Rate (95% UI)                |                                                                   |
| <b>Global</b>                    | <b>7677078</b><br>(7422100, 7970949) | <b>179.9</b><br>(174.1, 186.8) | <b>9777771</b><br>(9532791, 10031497) | <b>119.9</b><br>(116.9, 123) | <b>-33.4</b><br>(-36.1, -30.4)                                    |
| <b>High-income North America</b> | <b>278702</b><br>(275146, 282753)    | <b>83.3</b><br>(82.2, 84.5)    | <b>454008</b><br>(439322, 466732)     | <b>78.4</b><br>(75.9, 80.7)  | <b>-5.8</b><br>(-9.2, -2.6)                                       |
| Canada                           | 25910<br>(25123, 26718)              | 79.7<br>(77.2, 82.2)           | 48328<br>(44103, 52897)               | 76.9<br>(70.2, 83.9)         | -3.5<br>(-12.6, 6.3)                                              |
| Greenland                        | 121<br>(110, 133)                    | 314.3<br>(286.4, 343.9)        | 182<br>(163, 204)                     | 246.5<br>(220.4, 273.2)      | -21.6<br>(-31.7, -9.9)                                            |
| USA                              | 252664<br>(249271, 256404)           | 83.7<br>(82.6, 85)             | 405490<br>(391034, 417965)            | 78.6<br>(75.8, 81)           | -6.1<br>(-9.6, -2.8)                                              |
| <b>Australasia</b>               | <b>20399</b><br>(19824, 21025)       | <b>85.7</b><br>(83.3, 88.3)    | <b>35360</b><br>(31942, 39040)        | <b>78.1</b><br>(70.5, 86.4)  | <b>-8.9</b><br>(-18.3, 1.4)                                       |
| Australia                        | 16742<br>(16216, 17328)              | 84.4<br>(81.7, 87.4)           | 30171<br>(26821, 33778)               | 79.3<br>(70.5, 89)           | -6.1<br>(-17.1, 6.1)                                              |
| New Zealand                      | 3657<br>(3470, 3836)                 | 91.8<br>(87.2, 96.3)           | 5188<br>(4746, 5664)                  | 71.7<br>(65.7, 78.2)         | -21.9<br>(-29, -14)                                               |
| <b>High-income Asia-Pacific</b>  | <b>216941</b><br>(213511, 220720)    | <b>102</b><br>(100.4, 103.7)   | <b>268467</b><br>(255959, 279731)     | <b>68.3</b><br>(65, 71.3)    | <b>-33.1</b><br>(-36.5, -30)                                      |
| Brunei                           | 88<br>(79, 98)                       | 79.9<br>(71.8, 89.2)           | 167<br>(147, 188)                     | 49<br>(43.2, 55.3)           | -38.7<br>(-48.2, -28.3)                                           |
| Japan                            | 172127<br>(169542, 174893)           | 96.9<br>(95.4, 98.4)           | 227447<br>(218017, 236700)            | 77.8<br>(74.5, 81.1)         | -19.7<br>(-23.3, -16.3)                                           |
| Singapore                        | 1856<br>(1750, 1958)                 | 77.3<br>(72.9, 81.4)           | 1866<br>(1680, 2059)                  | 26.3<br>(23.8, 29)           | -65.9<br>(-69.7, -62.2)                                           |
| South Korea                      | 42870<br>(41041, 44820)              | 124.5<br>(119.4, 129.8)        | 38988<br>(34415, 43822)               | 44.6<br>(39.3, 50)           | -64.2<br>(-68.8, -59.6)                                           |
| <b>Western Europe</b>            | <b>535431</b><br>(528202, 543648)    | <b>98.2</b><br>(96.8, 99.8)    | <b>592534</b><br>(569919, 617019)     | <b>75.7</b><br>(72.7, 78.8)  | <b>-22.9</b><br>(-26.1, -19.6)                                    |
| Andorra                          | 45<br>(39, 54)                       | 75<br>(64.2, 89.7)             | 85<br>(71, 102)                       | 64.6<br>(54, 77.5)           | -13.8<br>(-32.8, 6.1)                                             |
| Austria                          | 5824<br>(5583, 6079)                 | 53.8<br>(51.5, 56.4)           | 8037<br>(7357, 8761)                  | 51.9<br>(47.4, 56.9)         | -3.5<br>(-12.7, 6.7)                                              |
| Belgium                          | 11352<br>(10892, 11843)              | 78.8<br>(75.5, 82.3)           | 16940<br>(15468, 18452)               | 85.8<br>(78.3, 93.5)         | 8.9<br>(-1.5, 20.1)                                               |
| Cyprus                           | 204<br>(180, 229)                    | 24.2<br>(21.3, 27.1)           | 425<br>(370, 491)                     | 23<br>(20.1, 26.3)           | -5.1<br>(-20.8, 15.6)                                             |
| Denmark                          | 6961<br>(6698, 7230)                 | 93.2<br>(89.6, 97)             | 8866<br>(8124, 9600)                  | 84.9<br>(77.9, 92)           | -9<br>(-17.1, -0.4)                                               |
| Finland                          | 4088<br>(3935, 4258)                 | 57.9<br>(55.7, 60.3)           | 5029<br>(4617, 5481)                  | 46.4<br>(42.5, 50.7)         | -19.8<br>(-27.2, -11.6)                                           |
| France                           | 133841<br>(129264, 138641)           | 179<br>(172.7, 185.4)          | 88073<br>(79794, 96043)               | 77.5<br>(70.2, 84.8)         | -56.7<br>(-60.9, -52.4)                                           |
| Germany                          | 95228<br>(91957, 98523)              | 81.3<br>(78.5, 84.2)           | 127210<br>(112423, 144197)            | 80.8<br>(71, 92)             | -0.6<br>(-12.8, 14.1)                                             |
| Greece                           | 5089<br>(4855, 5335)                 | 33.5<br>(32, 35.1)             | 5077<br>(4644, 5599)                  | 25.8<br>(23.4, 28.6)         | -23.1<br>(-30.9, -13.9)                                           |
| Iceland                          | 275<br>(257, 295)                    | 99.9<br>(93.2, 107.5)          | 405<br>(371, 441)                     | 81.1<br>(74.4, 88.4)         | -18.8<br>(-27.7, -8.8)                                            |
| Ireland                          | 5611<br>(5391, 5850)                 | 136.8<br>(131.4, 143)          | 7662<br>(6888, 8398)                  | 108.5<br>(97.5, 119.1)       | -20.7<br>(-28.5, -11.9)                                           |
| Israel                           | 1539<br>(1457, 1638)                 | 31.3<br>(29.6, 33.2)           | 2678<br>(2433, 2957)                  | 24.9<br>(22.7, 27.5)         | -20.3<br>(-28.5, -11.1)                                           |
| Italy                            | 54658<br>(52802, 56422)              | 63.8<br>(61.6, 65.8)           | 39353<br>(36152, 43005)               | 32.2<br>(29.6, 35.4)         | -49.4<br>(-54, -44.4)                                             |
| Luxembourg                       | 531<br>(492, 569)                    | 99.6<br>(92.4, 106.9)          | 622<br>(543, 712)                     | 68.3<br>(59.3, 78.2)         | -31.4<br>(-41.3, -19.5)                                           |

|                               |                                    |                                 |                                    |                              |                                 |
|-------------------------------|------------------------------------|---------------------------------|------------------------------------|------------------------------|---------------------------------|
| Malta                         | 252<br>(233, 273)                  | 57.7<br>(53.3, 62.3)            | 393<br>(358, 434)                  | 49<br>(44.5, 53.8)           | -15<br>(-24.3, -4.2)            |
| Netherlands                   | 16541<br>(16006, 17136)            | 85.1<br>(82.3, 88.3)            | 41376<br>(38226, 44710)            | 131.9<br>(121.9, 142.4)      | 55<br>(42, 68.6)                |
| Norway                        | 3209<br>(3135, 3283)               | 52.1<br>(50.9, 53.3)            | 3870<br>(3679, 4070)               | 44.7<br>(42.4, 47)           | -14.2<br>(-19.1, -9.5)          |
| Portugal                      | 13444<br>(12900, 14065)            | 98.8<br>(94.7, 103.5)           | 14561<br>(13157, 16177)            | 76.7<br>(68.9, 85.6)         | -22.4<br>(-30.7, -12.1)         |
| Spain                         | 43734<br>(42147, 45378)            | 84.8<br>(81.6, 88.1)            | 43427<br>(39752, 47362)            | 53.8<br>(49.1, 58.8)         | -36.5<br>(-42.4, -29.9)         |
| Sweden                        | 7288<br>(7046, 7545)               | 52<br>(50.2, 53.8)              | 9437<br>(8851, 10079)              | 50.7<br>(47.5, 54.3)         | -2.4<br>(-9.2, 4.9)             |
| Switzerland                   | 8654<br>(8320, 8974)               | 88.7<br>(85.2, 92.2)            | 9267<br>(8460, 10142)              | 60<br>(54.7, 65.8)           | -32.3<br>(-38.9, -24.5)         |
| United Kingdom                | 116545<br>(115075, 118202)         | 132.9<br>(131.3, 134.8)         | 159127<br>(155383, 163054)         | 138.6<br>(135.4, 142)        | 4.2<br>(1.5, 7.2)               |
| <b>Southern Latin America</b> | <b>73691<br/>(71697, 75810)</b>    | <b>154.5<br/>(150.4, 158.9)</b> | <b>70110<br/>(64358, 77363)</b>    | <b>86.9<br/>(79.7, 96)</b>   | <b>-43.8<br/>(-48.6, -37.3)</b> |
| Argentina                     | 51070<br>(49318, 52995)            | 153.6<br>(148.4, 159.2)         | 48758<br>(43210, 55673)            | 93.9<br>(83, 107.3)          | -38.9<br>(-46.2, -29.6)         |
| Chile                         | 14797<br>(14183, 15371)            | 144.2<br>(138.2, 149.7)         | 15040<br>(13457, 16974)            | 64.6<br>(57.9, 72.9)         | -55.2<br>(-60.2, -49.3)         |
| Uruguay                       | 7821<br>(7457, 8199)               | 200.7<br>(191.4, 210.4)         | 6309<br>(5524, 7130)               | 127.3<br>(110.7, 144.4)      | -36.6<br>(-45.1, -27)           |
| <b>Eastern Europe</b>         | <b>285809<br/>(278415, 292687)</b> | <b>97.4<br/>(94.8, 99.7)</b>    | <b>253360<br/>(246462, 261310)</b> | <b>75.7<br/>(73.7, 78.2)</b> | <b>-22.3<br/>(-24.6, -19.9)</b> |
| Belarus                       | 9154<br>(8730, 9584)               | 68.6<br>(65.4, 72)              | 10997<br>(9781, 12480)             | 70.1<br>(62.4, 79.2)         | 2.2<br>(-9.6, 16.1)             |
| Estonia                       | 1578<br>(1488, 1679)               | 75.8<br>(71.5, 80.6)            | 1423<br>(1200, 1681)               | 62.8<br>(52.6, 74.5)         | -17.2<br>(-31.4, -0.8)          |
| Latvia                        | 2553<br>(2410, 2696)               | 69.3<br>(65.5, 73.3)            | 2932<br>(2527, 3372)               | 85.3<br>(72.9, 98.1)         | 23<br>(4.9, 42.9)               |
| Lithuania                     | 3380<br>(3207, 3552)               | 72.8<br>(69.1, 76.4)            | 4967<br>(4515, 5481)               | 100.9<br>(91.6, 111.5)       | 38.7<br>(24.6, 54.6)            |
| Moldova                       | 2893<br>(2719, 3095)               | 60.9<br>(57.2, 65.1)            | 2530<br>(2304, 2790)               | 44.4<br>(40.5, 48.7)         | -27<br>(-34.9, -18.7)           |
| Russia                        | 207747<br>(202125, 213218)         | 108.7<br>(105.6, 111.6)         | 175425<br>(171521, 179375)         | 76.2<br>(74.4, 77.9)         | -29.9<br>(-31.8, -28.1)         |
| Ukraine                       | 58504<br>(55788, 61361)            | 80.3<br>(76.7, 84.3)            | 55085<br>(50580, 60112)            | 76.9<br>(70.6, 84.2)         | -4.2<br>(-13.4, 5.1)            |
| <b>Central Europe</b>         | <b>116569<br/>(114208, 118969)</b> | <b>76.8<br/>(75.3, 78.4)</b>    | <b>133458<br/>(128234, 139090)</b> | <b>68.7<br/>(66, 71.6)</b>   | <b>-10.6<br/>(-14.4, -6.6)</b>  |
| Albania                       | 1121<br>(1026, 1214)               | 47.9<br>(43.9, 51.8)            | 1285<br>(1036, 1606)               | 31.8<br>(25.7, 39.8)         | -33.5<br>(-47.9, -16.5)         |
| Bosnia and Herzegovina        | 2762<br>(2565, 2970)               | 60.3<br>(56.3, 64.6)            | 2975<br>(2634, 3348)               | 50.1<br>(44.4, 56.3)         | -16.8<br>(-27.6, -4.9)          |
| Bulgaria                      | 7354<br>(7023, 7694)               | 57.9<br>(55.2, 60.5)            | 6016<br>(5423, 6619)               | 48<br>(43.1, 52.9)           | -17<br>(-25.9, -7.1)            |
| Croatia                       | 6741<br>(6387, 7109)               | 100.1<br>(95, 105.3)            | 4837<br>(4393, 5250)               | 61.7<br>(56, 67)             | -38.4<br>(-44.7, -31.8)         |
| Czech Republic                | 10353<br>(9972, 10745)             | 77.4<br>(74.4, 80.3)            | 13526<br>(12406, 14783)            | 72.8<br>(66.6, 79.8)         | -6<br>(-14.8, 3.8)              |
| Hungary                       | 16618<br>(15883, 17408)            | 118<br>(112.6, 123.9)           | 15629<br>(14306, 17093)            | 93.3<br>(85.4, 102.1)        | -20.9<br>(-28.5, -12.9)         |
| Macedonia                     | 670<br>(614, 733)                  | 33<br>(30.4, 36)                | 1092<br>(971, 1226)                | 33.2<br>(29.6, 37.3)         | 0.5<br>(-13.5, 14.7)            |
| Montenegro                    | 414<br>(365, 468)                  | 61.8<br>(54.6, 69.8)            | 587<br>(507, 686)                  | 59.9<br>(51.6, 69.9)         | -3.1<br>(-19.4, 17.2)           |
| Poland                        | 41441<br>(40032, 42911)            | 92.2<br>(89, 95.4)              | 47531<br>(43403, 51778)            | 73.4<br>(67.1, 80)           | -20.4<br>(-27.8, -12.5)         |
| Romania                       | 12168<br>(11633, 12791)            | 41.9<br>(40.1, 44)              | 20837<br>(19138, 22702)            | 65.6<br>(60, 71.7)           | 56.4<br>(42.2, 72.8)            |

|                              |                                          |                                       |                                          |                                     |                                       |
|------------------------------|------------------------------------------|---------------------------------------|------------------------------------------|-------------------------------------|---------------------------------------|
| Serbia                       | 8387<br>(7532, 9373)                     | 67.5<br>(60.9, 75.1)                  | 9176<br>(8274, 10182)                    | 62.9<br>(56.8, 70)                  | -6.9<br>(-18.7, 7.7)                  |
| Slovakia                     | 5974<br>(5611, 6361)                     | 101.8<br>(95.7, 108.7)                | 7616<br>(6732, 8705)                     | 86.8<br>(76.7, 99.6)                | -14.8<br>(-26.2, -1.5)                |
| Slovenia                     | 2566<br>(2423, 2709)                     | 101<br>(95.6, 106.6)                  | 2351<br>(2101, 2611)                     | 62<br>(55.4, 68.9)                  | -38.7<br>(-46.3, -31.2)               |
| <b>Central Asia</b>          | <b>153270</b><br><b>(149652, 156784)</b> | <b>306.6</b><br><b>(299.2, 313.7)</b> | <b>105852</b><br><b>(100402, 111524)</b> | <b>135.2</b><br><b>(128.7, 142)</b> | <b>-55.9</b><br><b>(-58.1, -53.3)</b> |
| Armenia                      | 1567<br>(1449, 1688)                     | 53.5<br>(49.8, 57.4)                  | 1494<br>(1370, 1628)                     | 35.7<br>(32.9, 38.7)                | -33.3<br>(-40.4, -25.5)               |
| Azerbaijan                   | 11311<br>(10663, 12027)                  | 205.6<br>(194.4, 217.9)               | 18940<br>(16410, 22269)                  | 191.6<br>(166.5, 225.1)             | -6.8<br>(-20.3, 10.6)                 |
| Georgia                      | 2716<br>(2509, 2937)                     | 42<br>(38.9, 45.2)                    | 3631<br>(3305, 3931)                     | 65.9<br>(60.2, 71.3)                | 56.9<br>(38.9, 75.5)                  |
| Kazakhstan                   | 57555<br>(55547, 59643)                  | 424.6<br>(410.5, 439.2)               | 25754<br>(23733, 28025)                  | 147.2<br>(136.3, 159.5)             | -65.3<br>(-68.2, -62.5)               |
| Kyrgyzstan                   | 5955<br>(5560, 6396)                     | 186.6<br>(175.1, 199.7)               | 3431<br>(3183, 3702)                     | 77.4<br>(71.8, 83.3)                | -58.5<br>(-62.1, -54.4)               |
| Mongolia                     | 5612<br>(4727, 6593)                     | 536.6<br>(451.9, 629.2)               | 8055<br>(7115, 9035)                     | 386.1<br>(342.6, 434)               | -28.1<br>(-39.9, -13.1)               |
| Tajikistan                   | 7403<br>(7008, 7841)                     | 246.4<br>(232.7, 260.6)               | 7327<br>(6446, 8321)                     | 125.5<br>(110.4, 142.3)             | -49<br>(-55.9, -41.1)                 |
| Turkmenistan                 | 16101<br>(15517, 16645)                  | 772.3<br>(745, 798.5)                 | 8982<br>(8120, 9882)                     | 216.7<br>(195.6, 237.9)             | -71.9<br>(-74.7, -69)                 |
| Uzbekistan                   | 45052<br>(43405, 46733)                  | 369.2<br>(355.8, 382.9)               | 28236<br>(24845, 31855)                  | 115.2<br>(101.8, 129.2)             | -68.8<br>(-72.4, -64.8)               |
| <b>Central Latin America</b> | <b>41668</b><br><b>(40962, 42471)</b>    | <b>46.1</b><br><b>(45.3, 47)</b>      | <b>73603</b><br><b>(70141, 76826)</b>    | <b>31.1</b><br><b>(29.6, 32.4)</b>  | <b>-32.6</b><br><b>(-35.9, -29.4)</b> |
| Colombia                     | 14079<br>(13569, 14608)                  | 75.4<br>(72.6, 78.2)                  | 17363<br>(15392, 19623)                  | 32.2<br>(28.6, 36.4)                | -57.3<br>(-62.3, -51.8)               |
| Costa Rica                   | 1059<br>(1003, 1115)                     | 57.9<br>(54.8, 61)                    | 1846<br>(1674, 2028)                     | 37.2<br>(33.7, 40.9)                | -35.7<br>(-42.8, -28.4)               |
| El Salvador                  | 917<br>(848, 990)                        | 28.8<br>(26.6, 31.1)                  | 1819<br>(1538, 2168)                     | 32<br>(27, 38.1)                    | 11.2<br>(-7.7, 34.5)                  |
| Guatemala                    | 1277<br>(1209, 1357)                     | 30.8<br>(29.2, 32.6)                  | 4080<br>(3632, 4566)                     | 35.3<br>(31.5, 39.6)                | 14.8<br>(0.4, 31.3)                   |
| Honduras                     | 680<br>(584, 779)                        | 29.1<br>(25.1, 33.3)                  | 2019<br>(1579, 2561)                     | 32.9<br>(25.7, 41.8)                | 13.1<br>(-13.5, 50.6)                 |
| Mexico                       | 17428<br>(17019, 17852)                  | 37.1<br>(36.2, 38)                    | 32953<br>(31838, 33991)                  | 27.9<br>(27, 28.8)                  | -24.8<br>(-27.7, -22.1)               |
| Nicaragua                    | 409<br>(369, 457)                        | 23.7<br>(21.3, 26.5)                  | 753<br>(653, 878)                        | 16.1<br>(14, 18.7)                  | -32.2<br>(-43.6, -18.6)               |
| Panama                       | 526<br>(490, 563)                        | 33.5<br>(31.2, 36)                    | 1226<br>(1108, 1355)                     | 30.9<br>(27.9, 34.2)                | -7.8<br>(-19.3, 4.8)                  |
| Venezuela                    | 5293<br>(5032, 5564)                     | 51.5<br>(49, 54.1)                    | 11545<br>(9712, 13431)                   | 39.7<br>(33.3, 46.4)                | -22.9<br>(-35.5, -9)                  |
| <b>Andean Latin America</b>  | <b>9977</b><br><b>(9412, 10611)</b>      | <b>45</b><br><b>(42.4, 47.8)</b>      | <b>15643</b><br><b>(13998, 17245)</b>    | <b>28.7</b><br><b>(25.7, 31.7)</b>  | <b>-36.1</b><br><b>(-43, -28.7)</b>   |
| Bolivia                      | 2476<br>(2121, 2848)                     | 70.8<br>(60.8, 81.5)                  | 4331<br>(3407, 5454)                     | 49.2<br>(38.7, 61.8)                | -30.5<br>(-46.9, -11.1)               |
| Ecuador                      | 2770<br>(2637, 2903)                     | 48.6<br>(46.1, 51)                    | 4050<br>(3604, 4560)                     | 27.2<br>(24.2, 30.7)                | -43.9<br>(-50.7, -36.1)               |
| Peru                         | 4731<br>(4279, 5208)                     | 36.3<br>(32.9, 40)                    | 7262<br>(6106, 8492)                     | 23.6<br>(19.9, 27.6)                | -34.8<br>(-46, -20.7)                 |
| <b>Caribbean</b>             | <b>22709</b><br><b>(21586, 24066)</b>    | <b>84.2</b><br><b>(80, 89.1)</b>      | <b>41093</b><br><b>(37610, 45294)</b>    | <b>80.1</b><br><b>(73.3, 88.2)</b>  | <b>-4.8</b><br><b>(-12.6, 3.7)</b>    |
| Antigua and Barbuda          | 38<br>(35, 41)                           | 75.2<br>(69.1, 81.6)                  | 63<br>(57, 69)                           | 60.2<br>(54.8, 66)                  | -20<br>(-28.6, -8.4)                  |
| The Bahamas                  | 256<br>(228, 286)                        | 151.1<br>(134.4, 168.8)               | 487<br>(426, 555)                        | 118.4<br>(104.1, 134.5)             | -21.7<br>(-34.2, -5.7)                |
| Barbados                     | 338<br>(315, 364)                        | 124.1<br>(115.2, 133.4)               | 423<br>(378, 474)                        | 90.5<br>(80.7, 101.5)               | -27.1<br>(-35.8, -15.7)               |

|                                  |                                             |                                       |                                             |                                       |                                       |
|----------------------------------|---------------------------------------------|---------------------------------------|---------------------------------------------|---------------------------------------|---------------------------------------|
| Belize                           | 40<br>(37, 44)                              | 41.8<br>(38, 46)                      | 157<br>(142, 173)                           | 54.7<br>(49.8, 60.2)                  | 30.9<br>(14.6, 51.8)                  |
| Bermuda                          | 98<br>(90, 107)                             | 150.4<br>(137.7, 163.4)               | 109<br>(97, 121)                            | 90.3<br>(81.1, 100.4)                 | -40<br>(-47.5, -31.2)                 |
| Cuba                             | 8361<br>(8026, 8733)                        | 79.9<br>(76.6, 83.5)                  | 21010<br>(18117, 24130)                     | 114.8<br>(99.1, 131.9)                | 43.7<br>(23.4, 66)                    |
| Dominica                         | 63<br>(59, 68)                              | 92.3<br>(86.2, 99.2)                  | 87<br>(78, 96)                              | 97.5<br>(87.4, 107.5)                 | 5.6<br>(-7.8, 19.1)                   |
| Dominican Republic               | 1558<br>(1397, 1730)                        | 37<br>(33.1, 41.1)                    | 4307<br>(3612, 5067)                        | 45.5<br>(38.1, 53.5)                  | 23<br>(-0.6, 49.8)                    |
| Grenada                          | 101<br>(94, 109)                            | 151.8<br>(140.3, 164.2)               | 194<br>(175, 214)                           | 141<br>(126.7, 156.5)                 | -7.1<br>(-18.4, 4.9)                  |
| Guyana                           | 185<br>(172, 199)                           | 43.9<br>(40.9, 47.2)                  | 279<br>(243, 320)                           | 41.3<br>(36.1, 47.4)                  | -6.1<br>(-19.2, 8.6)                  |
| Haiti                            | 4026<br>(3033, 5212)                        | 111<br>(84.4, 143.3)                  | 6112<br>(4500, 8409)                        | 83.2<br>(61.1, 114.9)                 | -25.1<br>(-42.3, -0.9)                |
| Jamaica                          | 1165<br>(1077, 1264)                        | 65.3<br>(60.3, 70.9)                  | 2061<br>(1706, 2435)                        | 71.8<br>(59.4, 84.9)                  | 10.1<br>(-9.8, 32.9)                  |
| Puerto Rico                      | 4898<br>(4680, 5153)                        | 132.4<br>(126.4, 139.3)               | 3058<br>(2747, 3391)                        | 48.1<br>(43.3, 53.3)                  | -63.7<br>(-67.5, -59.2)               |
| Saint Lucia                      | 103<br>(96, 111)                            | 114.7<br>(106.3, 122.9)               | 196<br>(177, 218)                           | 91.3<br>(82.3, 101.3)                 | -20.3<br>(-29.8, -9.7)                |
| Saint Vincent and the Grenadines | 36<br>(33, 40)                              | 50.1<br>(45.8, 55.1)                  | 81<br>(72, 91)                              | 59<br>(52.7, 65.9)                    | 17.7<br>(0.2, 37.3)                   |
| Suriname                         | 87<br>(79, 96)                              | 31.7<br>(28.8, 34.6)                  | 197<br>(170, 228)                           | 32.1<br>(27.9, 36.9)                  | 1.4<br>(-15.3, 19.7)                  |
| Trinidad and Tobago              | 501<br>(463, 539)                           | 56.1<br>(51.9, 60.4)                  | 625<br>(495, 777)                           | 34.2<br>(27.2, 42.4)                  | -39<br>(-51.7, -23.1)                 |
| Virgin Islands                   | 76<br>(68, 86)                              | 81.3<br>(72.4, 91.5)                  | 171<br>(136, 199)                           | 92.8<br>(74.2, 107.5)                 | 14.2<br>(-9.4, 37.2)                  |
| <b>Tropical Latin America</b>    | <b>142864</b><br><b>(140031, 146085)</b>    | <b>141.3</b><br><b>(138.5, 144.3)</b> | <b>280946</b><br><b>(273964, 288173)</b>    | <b>116.1</b><br><b>(113.3, 119)</b>   | <b>-17.8</b><br><b>(-20.2, -15.3)</b> |
| Brazil                           | 141236<br>(138356, 144442)                  | 142.9<br>(140.1, 146.1)               | 276669<br>(269727, 283809)                  | 117.1<br>(114.2, 120.1)               | -18.1<br>(-20.6, -15.5)               |
| Paraguay                         | 1628<br>(1450, 1793)                        | 71<br>(63.4, 78.1)                    | 4277<br>(3435, 5289)                        | 78.8<br>(63.7, 97.1)                  | 11<br>(-12.2, 40)                     |
| <b>East Asia</b>                 | <b>4207134</b><br><b>(4011555, 4449226)</b> | <b>436.1</b><br><b>(416, 460.7)</b>   | <b>4665986</b><br><b>(4447417, 4890303)</b> | <b>220.9</b><br><b>(210.7, 231.6)</b> | <b>-49.3</b><br><b>(-53.3, -45.7)</b> |
| China                            | 4078281<br>(3890143, 4314430)               | 446.4<br>(425.7, 471.7)               | 4464980<br>(4247816, 4690846)               | 222.6<br>(211.9, 233.6)               | -50.1<br>(-54.1, -46.4)               |
| North Korea                      | 38187<br>(30127, 47085)                     | 211<br>(168, 257.5)                   | 64891<br>(48202, 81054)                     | 199.5<br>(149.3, 249.5)               | -5.4<br>(-28.2, 22)                   |
| Taiwan (Province of China)       | 20574<br>(19908, 21302)                     | 118<br>(114.3, 122)                   | 60949<br>(55938, 66379)                     | 162<br>(148.7, 176)                   | 37.3<br>(25, 49.6)                    |
| <b>Southeast Asia</b>            | <b>215284</b><br><b>(192785, 235968)</b>    | <b>74.7</b><br><b>(66.9, 81.6)</b>    | <b>380534</b><br><b>(355815, 408779)</b>    | <b>59.6</b><br><b>(55.9, 63.9)</b>    | <b>-20.2</b><br><b>(-28.5, -8.5)</b>  |
| Cambodia                         | 5891<br>(4936, 6865)                        | 113.8<br>(95.6, 132.5)                | 7650<br>(6265, 9485)                        | 62.1<br>(51.1, 76.2)                  | -45.5<br>(-56.9, -31.3)               |
| Indonesia                        | 25698<br>(23178, 29296)                     | 22.6<br>(20.4, 25.8)                  | 45586<br>(42349, 48978)                     | 19.4<br>(18, 20.9)                    | -14<br>(-26.7, -1.8)                  |
| Laos                             | 2823<br>(2278, 3377)                        | 119<br>(95.7, 141.9)                  | 2871<br>(2159, 3650)                        | 60.9<br>(46.2, 77.4)                  | -48.8<br>(-60.8, -34.5)               |
| Malaysia                         | 6403<br>(5863, 7030)                        | 65.6<br>(60.1, 71.9)                  | 15286<br>(13549, 17422)                     | 57.5<br>(51, 65.5)                    | -12.4<br>(-25.5, 4.7)                 |
| Maldives                         | 98<br>(67, 123)                             | 90<br>(65.1, 111.5)                   | 95<br>(86, 106)                             | 31.3<br>(28.2, 34.9)                  | -65.2<br>(-72.8, -49.8)               |
| Mauritius                        | 559<br>(523, 597)                           | 70.2<br>(65.6, 74.9)                  | 856<br>(777, 940)                           | 49.6<br>(45.2, 54.3)                  | -29.3<br>(-36.8, -20.9)               |
| Myanmar                          | 80796<br>(64541, 99218)                     | 311.2<br>(250.5, 378.6)               | 103323<br>(89139, 120844)                   | 214.2<br>(186, 249.8)                 | -31.2<br>(-47.5, -11.3)               |
| Philippines                      | 11835<br>(11042, 12659)                     | 34<br>(31.9, 36.3)                    | 23704<br>(20359, 27080)                     | 29.8<br>(25.8, 34)                    | -12.4<br>(-25.3, 2.3)                 |

|                                     |                                    |                              |                                    |                              |                                 |
|-------------------------------------|------------------------------------|------------------------------|------------------------------------|------------------------------|---------------------------------|
| Sri Lanka                           | 13412<br>(12191, 14703)            | 111.2<br>(101.1, 122.1)      | 22780<br>(18718, 27244)            | 88.4<br>(73.1, 105.4)        | -20.5<br>(-35.8, -1.8)          |
| Seychelles                          | 88<br>(79, 98)                     | 155.1<br>(138.2, 173.3)      | 144<br>(129, 160)                  | 125.2<br>(112.6, 138.2)      | -19.3<br>(-30.9, -6)            |
| Thailand                            | 28382<br>(25915, 31082)            | 70.9<br>(65, 77.4)           | 73832<br>(64408, 84687)            | 72.2<br>(63, 82.4)           | 1.8<br>(-13.1, 18.8)            |
| East Timor                          | 266<br>(214, 323)                  | 75.9<br>(61, 91.8)           | 414<br>(309, 541)                  | 49.4<br>(37.4, 64.5)         | -34.9<br>(-50.7, -16.2)         |
| Vietnam                             | 38747<br>(31744, 46761)            | 91.7<br>(75.2, 110.3)        | 83493<br>(68934, 104311)           | 83.1<br>(69.1, 102.5)        | -9.4<br>(-31.9, 23.7)           |
| <b>Oceania</b>                      | <b>2021<br/>(1721, 2374)</b>       | <b>57.2<br/>(49.2, 66.4)</b> | <b>4240<br/>(3548, 5080)</b>       | <b>54.4<br/>(46.3, 63.6)</b> | <b>-4.8<br/>(-18, 9.3)</b>      |
| American Samoa                      | 7<br>(6, 8)                        | 26.3<br>(23.4, 29.4)         | 14<br>(12, 16)                     | 29.4<br>(24.9, 33.9)         | 11.8<br>(-9.9, 34)              |
| Federated States of Micronesia      | 31<br>(25, 36)                     | 57.8<br>(48, 68.7)           | 38<br>(30, 47)                     | 49.2<br>(39.7, 59.2)         | -15<br>(-34.5, 8.9)             |
| Fiji                                | 177<br>(151, 207)                  | 42.6<br>(36.6, 49.5)         | 429<br>(368, 501)                  | 54.5<br>(47.1, 62.8)         | 28<br>(2.9, 59.2)               |
| Guam                                | 39<br>(34, 43)                     | 44<br>(39.1, 49.5)           | 112<br>(98, 127)                   | 59.6<br>(52.8, 67.3)         | 35.6<br>(14.2, 59.9)            |
| Kiribati                            | 36<br>(32, 40)                     | 86.2<br>(77, 95.4)           | 76<br>(64, 90)                     | 98.7<br>(84.7, 116.3)        | 14.5<br>(-7, 40)                |
| Marshall Islands                    | 14<br>(12, 17)                     | 77.9<br>(66.4, 91.7)         | 29<br>(24, 36)                     | 78.4<br>(64.9, 95.2)         | 0.6<br>(-18.1, 22.9)            |
| Northern Mariana Islands            | 7<br>(6, 8)                        | 31.4<br>(26.5, 38.7)         | 20<br>(17, 23)                     | 35.1<br>(30.6, 40.5)         | 11.8<br>(-12.1, 38.2)           |
| Papua New Guinea                    | 1379<br>(1124, 1679)               | 61<br>(50.1, 73.8)           | 2916<br>(2278, 3683)               | 53.8<br>(42.9, 66.7)         | -11.8<br>(-28.3, 7.9)           |
| Samoa                               | 32<br>(26, 41)                     | 35.2<br>(29, 45.1)           | 47<br>(37, 61)                     | 33.4<br>(26.7, 43.7)         | -5.2<br>(-24.9, 17.7)           |
| Solomon Islands                     | 99<br>(79, 121)                    | 59.9<br>(47.7, 72.4)         | 193<br>(154, 236)                  | 52.8<br>(42.1, 64.4)         | -11.9<br>(-29.6, 8.1)           |
| Tonga                               | 29<br>(24, 34)                     | 49.7<br>(41.8, 58.3)         | 44<br>(37, 53)                     | 53.8<br>(45.3, 64.1)         | 8.4<br>(-13.2, 39.4)            |
| Vanuatu                             | 39<br>(28, 51)                     | 51.2<br>(36.9, 66.4)         | 89<br>(66, 119)                    | 49.5<br>(37.1, 65.1)         | -3.2<br>(-25.2, 26.3)           |
| <b>North Africa and Middle East</b> | <b>128396<br/>(113808, 141600)</b> | <b>66.6<br/>(59.5, 73.3)</b> | <b>233839<br/>(216220, 254338)</b> | <b>51.2<br/>(47.5, 55.5)</b> | <b>-23.1<br/>(-29.1, -15.2)</b> |
| Afghanistan                         | 18786<br>(10669, 25240)            | 246<br>(140.7, 326.9)        | 25966<br>(19576, 32518)            | 204.5<br>(157.2, 255.1)      | -16.9<br>(-36.6, 44.4)          |
| Algeria                             | 3342<br>(2976, 3727)               | 24.9<br>(22.2, 27.7)         | 7396<br>(6589, 8277)               | 21.7<br>(19.3, 24.4)         | -12.9<br>(-25.8, 1)             |
| Bahrain                             | 157<br>(141, 173)                  | 79.6<br>(71.6, 87.6)         | 285<br>(247, 332)                  | 25.8<br>(22.7, 29.5)         | -67.6<br>(-72.4, -61.8)         |
| Egypt                               | 12457<br>(11331, 13719)            | 38.1<br>(34.7, 42)           | 30195<br>(26397, 34535)            | 44.2<br>(38.9, 50.3)         | 16<br>(-1.6, 35.9)              |
| Iran                                | 33089<br>(30631, 36216)            | 113.2<br>(105.1, 123.6)      | 61103<br>(58577, 64963)            | 85.3<br>(81.9, 90.6)         | -24.6<br>(-30.6, -18.1)         |
| Iraq                                | 3214<br>(2694, 3776)               | 37.3<br>(31.5, 43.5)         | 4278<br>(3856, 4710)               | 16<br>(14.5, 17.6)           | -57<br>(-64.9, -46.8)           |
| Jordan                              | 490<br>(421, 561)                  | 30.1<br>(25.8, 34.5)         | 1445<br>(1226, 1684)               | 22.1<br>(18.9, 25.8)         | -26.4<br>(-40.7, -6.7)          |
| Kuwait                              | 272<br>(253, 294)                  | 34<br>(31.6, 36.8)           | 591<br>(528, 662)                  | 20.8<br>(18.6, 23.3)         | -38.9<br>(-46.5, -30.5)         |
| Lebanon                             | 788<br>(645, 922)                  | 32.7<br>(26.8, 38.2)         | 1582<br>(1381, 1799)               | 25.6<br>(22.4, 29.1)         | -21.8<br>(-37.4, 2.3)           |
| Libya                               | 679<br>(563, 819)                  | 32.4<br>(27, 39)             | 2070<br>(1652, 2566)               | 40.1<br>(32.3, 49.2)         | 23.6<br>(-7.3, 64.4)            |
| Morocco                             | 5005<br>(4363, 5696)               | 32.4<br>(28.1, 36.8)         | 9796<br>(8071, 11594)              | 29.4<br>(24.3, 34.7)         | -9.2<br>(-28, 14.8)             |
| Palestine                           | 300<br>(248, 358)                  | 31<br>(25.5, 36.8)           | 598<br>(541, 664)                  | 22.1<br>(19.9, 24.5)         | -28.6<br>(-42.5, -10.5)         |

|                                    |                                          |                                       |                                             |                                       |                                      |
|------------------------------------|------------------------------------------|---------------------------------------|---------------------------------------------|---------------------------------------|--------------------------------------|
| Oman                               | 493<br>(391, 611)                        | 63.9<br>(51.2, 79)                    | 1230<br>(979, 1491)                         | 53.1<br>(42.9, 63.4)                  | -17<br>(-37.8, 8.5)                  |
| Qatar                              | 134<br>(114, 157)                        | 100.4<br>(86, 116.3)                  | 445<br>(360, 542)                           | 42<br>(34.5, 50.5)                    | -58.2<br>(-67.7, -46.2)              |
| Saudi Arabia                       | 3226<br>(2634, 3973)                     | 48.3<br>(39.5, 59.4)                  | 8044<br>(6789, 9699)                        | 42.2<br>(36.6, 49.5)                  | -12.7<br>(-31.1, 12.4)               |
| Sudan                              | 12331<br>(8928, 16600)                   | 119.2<br>(86.8, 163.3)                | 20473<br>(14297, 27764)                     | 104<br>(72.6, 140.3)                  | -12.7<br>(-32.5, 12)                 |
| Syria                              | 1399<br>(1211, 1641)                     | 23.8<br>(20.7, 27.8)                  | 3121<br>(2514, 3835)                        | 22.4<br>(18.1, 27.5)                  | -5.8<br>(-28.5, 23.4)                |
| Tunisia                            | 948<br>(854, 1052)                       | 17.8<br>(16.1, 19.7)                  | 2189<br>(1728, 2722)                        | 17.7<br>(14, 21.9)                    | -0.8<br>(-23.6, 25.6)                |
| Turkey                             | 23592<br>(21110, 26339)                  | 58.3<br>(52.3, 65.2)                  | 28775<br>(26069, 31873)                     | 32.1<br>(29.1, 35.6)                  | -44.9<br>(-52.4, -36.4)              |
| United Arab Emirates               | 874<br>(614, 1176)                       | 146.3<br>(102, 199.9)                 | 10864<br>(7877, 14807)                      | 202<br>(149.3, 278.2)                 | 38.1<br>(2.7, 92.8)                  |
| Yemen                              | 6738<br>(4360, 9498)                     | 117.9<br>(77.4, 166.4)                | 13175<br>(9564, 17628)                      | 92.7<br>(68.4, 123.7)                 | -21.4<br>(-44.6, 19.1)               |
| <b>South Asia</b>                  | <b>771588</b><br><b>(729335, 814205)</b> | <b>113.4</b><br><b>(106.8, 119.7)</b> | <b>1424910</b><br><b>(1347200, 1507781)</b> | <b>97.8</b><br><b>(92.5, 103.5)</b>   | <b>-13.7</b><br><b>(-19.7, -6.2)</b> |
| Bangladesh                         | 59861<br>(52001, 70428)                  | 109.6<br>(96, 128.1)                  | 75777<br>(64674, 88173)                     | 58.6<br>(50.3, 67.6)                  | -46.6<br>(-57.9, -33.7)              |
| Bhutan                             | 557<br>(459, 686)                        | 191.7<br>(158.1, 235.6)               | 681<br>(542, 855)                           | 103.9<br>(82.8, 130.4)                | -45.8<br>(-60.1, -26.9)              |
| India                              | 582282<br>(548223, 614467)               | 105<br>(98.7, 110.8)                  | 1074440<br>(1014268, 1135388)               | 91.5<br>(86.2, 96.7)                  | -12.9<br>(-18.4, -5.9)               |
| Nepal                              | 17725<br>(14877, 21313)                  | 160.1<br>(135.3, 192.8)               | 27772<br>(22568, 33243)                     | 120.8<br>(98.3, 144.1)                | -24.5<br>(-40.2, -7.1)               |
| Pakistan                           | 111163<br>(97207, 128080)                | 180.9<br>(158.1, 207.4)               | 246239<br>(201579, 296353)                  | 194.6<br>(159.8, 233.7)               | 7.6<br>(-13.9, 34.7)                 |
| <b>Southern sub-Saharan Africa</b> | <b>98588</b><br><b>(91197, 107083)</b>   | <b>319.7</b><br><b>(294.9, 347.1)</b> | <b>142739</b><br><b>(135250, 150139)</b>    | <b>242.4</b><br><b>(229.9, 254.7)</b> | <b>-24.2</b><br><b>(-31, -16.1)</b>  |
| Botswana                           | 1885<br>(1486, 2370)                     | 293.5<br>(233.4, 366.2)               | 2498<br>(2089, 3008)                        | 172.8<br>(144.9, 207.9)               | -41.1<br>(-53.6, -24.8)              |
| Lesotho                            | 3673<br>(3100, 4287)                     | 342.4<br>(289, 399.7)                 | 4655<br>(3887, 5540)                        | 361.3<br>(301.8, 427.8)               | 5.5<br>(-15.4, 31.1)                 |
| Namibia                            | 744<br>(632, 867)                        | 95<br>(81.1, 110.9)                   | 1108<br>(928, 1321)                         | 73.9<br>(62.3, 87.7)                  | -22.2<br>(-37, -3.4)                 |
| South Africa                       | 76343<br>(70229, 83459)                  | 325.4<br>(298.3, 355.6)               | 105318<br>(100437, 110817)                  | 226.9<br>(216.6, 238.3)               | -30.3<br>(-36.4, -22.8)              |
| Swaziland                          | 1529<br>(1215, 1868)                     | 454<br>(362.3, 552.2)                 | 2490<br>(1907, 3063)                        | 394.6<br>(303.8, 483.9)               | -13.1<br>(-33.6, 12.8)               |
| Zimbabwe                           | 14415<br>(12373, 16660)                  | 316<br>(271, 364.1)                   | 26670<br>(22286, 31584)                     | 349<br>(293.6, 410.4)                 | 10.4<br>(-12.6, 40.2)                |
| <b>Western sub-Saharan Africa</b>  | <b>67419</b><br><b>(58462, 79219)</b>    | <b>69.9</b><br><b>(60.9, 82)</b>      | <b>178401</b><br><b>(154536, 214115)</b>    | <b>91.9</b><br><b>(80, 109.4)</b>     | <b>31.4</b><br><b>(12.3, 55.4)</b>   |
| Benin                              | 1858<br>(1609, 2142)                     | 87<br>(75.3, 100.3)                   | 7468<br>(5856, 9540)                        | 148.9<br>(117.3, 189)                 | 71.1<br>(33.6, 122.3)                |
| Burkina Faso                       | 6216<br>(4842, 7274)                     | 134.9<br>(106.4, 157.1)               | 12927<br>(10855, 15191)                     | 139.7<br>(117.9, 164)                 | 3.6<br>(-18.2, 36.6)                 |
| Cameroon                           | 5422<br>(4151, 6391)                     | 108.4<br>(83.3, 127.3)                | 20387<br>(15500, 25499)                     | 162.8<br>(124.8, 201.3)               | 50.2<br>(14.1, 92.4)                 |
| Cape Verde                         | 408<br>(366, 448)                        | 186<br>(166.3, 204.3)                 | 1125<br>(975, 1294)                         | 254.7<br>(221, 292.3)                 | 36.9<br>(13.9, 62.5)                 |
| Chad                               | 2086<br>(1734, 2464)                     | 69.3<br>(57.7, 81.9)                  | 7272<br>(5730, 9247)                        | 124.8<br>(98.5, 158.5)                | 80<br>(41.8, 128.2)                  |
| Côte d'Ivoire                      | 1143<br>(968, 1336)                      | 24.6<br>(20.9, 28.7)                  | 3359<br>(2700, 4122)                        | 29.8<br>(24.1, 36.6)                  | 21.3<br>(-4.9, 54.1)                 |
| The Gambia                         | 186<br>(150, 228)                        | 46.4<br>(38.1, 56.6)                  | 510<br>(421, 616)                           | 51.6<br>(43.1, 61.9)                  | 11.1<br>(-12.4, 42.8)                |
| Ghana                              | 5628<br>(4717, 6764)                     | 79.8<br>(67, 95.4)                    | 14896<br>(12617, 17348)                     | 89.4<br>(76.5, 103.2)                 | 11.9<br>(-12.4, 41.7)                |



|                                   |                                          |                                     |                                          |                                       |                                       |
|-----------------------------------|------------------------------------------|-------------------------------------|------------------------------------------|---------------------------------------|---------------------------------------|
| Guinea                            | 1535<br>(1353, 1740)                     | 42.8<br>(37.7, 48.4)                | 3267<br>(2665, 3967)                     | 56.8<br>(46.2, 68.8)                  | 32.7<br>(6.3, 66.3)                   |
| Guinea-Bissau                     | 600<br>(495, 715)                        | 132.4<br>(109.9, 156.8)             | 1560<br>(1239, 1978)                     | 198.1<br>(158.3, 249.6)               | 49.7<br>(17.5, 97.9)                  |
| Liberia                           | 1105<br>(928, 1299)                      | 91.8<br>(77.1, 107.5)               | 2854<br>(2264, 3569)                     | 135<br>(107.8, 167.6)                 | 47.1<br>(15.8, 89.7)                  |
| Mali                              | 2946<br>(2569, 3365)                     | 64.5<br>(56.5, 73.4)                | 5194<br>(4278, 6358)                     | 57.1<br>(47.1, 69.6)                  | -11.5<br>(-27.8, 10.3)                |
| Mauritania                        | 1115<br>(903, 1378)                      | 102.9<br>(83.6, 127.4)              | 2331<br>(1780, 2975)                     | 112.4<br>(85.9, 142.6)                | 9.3<br>(-14.2, 37.6)                  |
| Niger                             | 2511<br>(1844, 3077)                     | 77.1<br>(57.2, 94)                  | 8083<br>(6218, 10102)                    | 100.2<br>(77.9, 124)                  | 29.9<br>(2.3, 64.3)                   |
| Nigeria                           | 29048<br>(21441, 39700)                  | 60.3<br>(45, 81.8)                  | 69446<br>(49093, 100923)                 | 78.2<br>(56.2, 112.3)                 | 29.7<br>(-8, 85.4)                    |
| São Tomé and Príncipe             | 39<br>(31, 47)                           | 55.6<br>(44.5, 68)                  | 109<br>(80, 142)                         | 99.2<br>(73.5, 127.9)                 | 78.4<br>(28.9, 141.4)                 |
| Senegal                           | 2974<br>(2489, 3669)                     | 84.4<br>(70.6, 104.1)               | 8809<br>(7160, 11308)                    | 115.4<br>(94, 147.9)                  | 36.7<br>(9.6, 65.7)                   |
| Sierra Leone                      | 1530<br>(1129, 1836)                     | 74.3<br>(54.8, 89.1)                | 4259<br>(3407, 5248)                     | 116.3<br>(93.5, 143.1)                | 56.5<br>(19.7, 108.4)                 |
| Togo                              | 1070<br>(884, 1272)                      | 75.7<br>(63.1, 89.5)                | 4543<br>(3512, 5845)                     | 116.1<br>(91.5, 148)                  | 53.3<br>(19.9, 92.3)                  |
| <b>Eastern sub-Saharan Africa</b> | <b>220675</b><br><b>(196648, 245176)</b> | <b>262.4</b><br><b>(237, 289.6)</b> | <b>320631</b><br><b>(294337, 350301)</b> | <b>187.5</b><br><b>(172.4, 205.4)</b> | <b>-28.6</b><br><b>(-36.9, -19.4)</b> |
| Burundi                           | 11911<br>(9601, 15357)                   | 481<br>(391.4, 616.3)               | 9997<br>(8022, 12425)                    | 215.9<br>(175, 265.9)                 | -55.1<br>(-65.4, -42.4)               |
| Comoros                           | 889<br>(702, 1158)                       | 388.8<br>(307.8, 506.2)             | 925<br>(760, 1117)                       | 192.9<br>(158.4, 230.8)               | -50.4<br>(-61.9, -35.3)               |
| Djibouti                          | 579<br>(391, 910)                        | 320.1<br>(220.5, 503.7)             | 1238<br>(833, 1807)                      | 195.9<br>(134.4, 282.4)               | -38.8<br>(-60.4, -7.2)                |
| Eritrea                           | 5600<br>(4132, 7265)                     | 487.5<br>(380.1, 620.2)             | 6468<br>(5248, 7845)                     | 245.5<br>(200, 293.9)                 | -49.6<br>(-61.7, -33.9)               |
| Ethiopia                          | 49433<br>(40550, 59635)                  | 227.7<br>(190.1, 271.8)             | 44776<br>(40252, 50216)                  | 108.4<br>(97.1, 121.7)                | -52.4<br>(-62.7, -39.8)               |
| Kenya                             | 19482<br>(15212, 25805)                  | 213.1<br>(167.2, 282.4)             | 43672<br>(36040, 55567)                  | 188.7<br>(155.2, 241.9)               | -11.4<br>(-19.9, -2.7)                |
| Madagascar                        | 17015<br>(14294, 20494)                  | 292.2<br>(245.7, 350.8)             | 21639<br>(17223, 26595)                  | 181.4<br>(146, 221.3)                 | -37.9<br>(-51.6, -22)                 |
| Malawi                            | 25604<br>(14591, 32058)                  | 556.1<br>(334.4, 688.6)             | 47941<br>(39938, 55773)                  | 598<br>(500.4, 691.8)                 | 7.5<br>(-19, 80.7)                    |
| Mozambique                        | 11337<br>(9745, 13128)                   | 170.9<br>(147.5, 196.2)             | 21364<br>(17818, 25797)                  | 179.7<br>(150.3, 215.3)               | 5.1<br>(-15, 30.8)                    |
| Rwanda                            | 12987<br>(8287, 15804)                   | 397.3<br>(252.5, 482.3)             | 9646<br>(6801, 12132)                    | 156<br>(110.3, 194.8)                 | -60.7<br>(-68.6, -50)                 |
| Somalia                           | 12435<br>(7157, 18422)                   | 408.5<br>(259.7, 579.4)             | 18156<br>(13392, 23670)                  | 258.9<br>(193.3, 333.6)               | -36.6<br>(-57.2, 4.2)                 |
| South Sudan                       | 11210<br>(6797, 17029)                   | 423.7<br>(270.1, 633)               | 11880<br>(8590, 16204)                   | 282.3<br>(206.9, 381.3)               | -33.4<br>(-55.4, 4.9)                 |
| Tanzania                          | 14226<br>(10636, 17474)                  | 122.5<br>(94.3, 148.9)              | 23229<br>(19707, 27404)                  | 93.7<br>(79.8, 109.9)                 | -23.5<br>(-39.4, 1.8)                 |
| Uganda                            | 22341<br>(18734, 26467)                  | 308.7<br>(260.6, 365.2)             | 50757<br>(42538, 60109)                  | 336.1<br>(282.6, 395.6)               | 8.9<br>(-13.3, 34.7)                  |
| Zambia                            | 5516<br>(4413, 6443)                     | 177.3<br>(144.5, 205.7)             | 8743<br>(7393, 10137)                    | 129.4<br>(110.3, 148.9)               | -27<br>(-42, -8.1)                    |
| <b>Central sub-Saharan Africa</b> | <b>67942</b><br><b>(58543, 78768)</b>    | <b>260</b><br><b>(224.9, 300.3)</b> | <b>102057</b><br><b>(86079, 119191)</b>  | <b>178.8</b><br><b>(151.7, 208.6)</b> | <b>-31.2</b><br><b>(-42.9, -19.2)</b> |
| Angola                            | 14715<br>(11112, 18398)                  | 317.4<br>(246.6, 393.4)             | 25045<br>(20376, 29777)                  | 206.5<br>(170.3, 244.4)               | -34.9<br>(-50.9, -11.6)               |
| Central African Republic          | 4864<br>(3890, 5742)                     | 356.8<br>(290.4, 420.6)             | 6392<br>(4871, 8158)                     | 256.1<br>(197.2, 322.7)               | -28.2<br>(-43.2, -7.6)                |
| Congo                             | 4511<br>(3758, 5468)                     | 368.8<br>(310.4, 443.8)             | 6078<br>(4751, 7598)                     | 218.7<br>(175, 270.2)                 | -40.7<br>(-52.5, -26.1)               |

|                   |                         |                         |                         |                         |                         |
|-------------------|-------------------------|-------------------------|-------------------------|-------------------------|-------------------------|
| DR Congo          | 41231<br>(33336, 50627) | 228.8<br>(185.5, 278.3) | 60971<br>(47153, 75964) | 160.6<br>(125.7, 200.6) | -29.8<br>(-46.1, -11.7) |
| Equatorial Guinea | 881<br>(682, 1104)      | 392.7<br>(310.1, 487.1) | 1185<br>(822, 1666)     | 235.2<br>(166.8, 327.7) | -40.1<br>(-57.7, -16.2) |
| Gabon             | 1740<br>(1338, 2100)    | 286.1<br>(220.7, 345.1) | 2385<br>(1824, 2925)    | 210.8<br>(162.3, 255.4) | -26.3<br>(-40.6, -6.9)  |

**Appendix Table 5. Country-level proportion of oesophageal squamous cell carcinoma (OSCC) to all oesophageal cancer (OC) cases, Socio-demographic Index (SDI), access to piped water, indoor air pollution index, and Healthcare Access and Quality (HAQ) Index. Results are sorted by OSCC to OC proportion.**

| Country or territory     | OSCC to OC | SDI       | Access to piped water | Indoor air pollution | HAQ Index |
|--------------------------|------------|-----------|-----------------------|----------------------|-----------|
| Benin                    | 97.4       | 0.3304089 | 0.7796332             | 0.9398518            | 41.98363  |
| Swaziland                | 97.2       | 0.5618348 | 0.7472622             | 0.5587243            | 39.6641   |
| Cameroon                 | 96.7       | 0.4275668 | 0.6297141             | 0.8036034            | 42.99063  |
| Niger                    | 96.5       | 0.1792128 | 0.693911              | 0.9877465            | 40.53796  |
| Gabon                    | 96         | 0.5990072 | 0.8983477             | 0.1786359            | 49.86312  |
| Mali                     | 95.9       | 0.2430999 | 0.6608586             | 0.9927573            | 44.31631  |
| Ethiopia                 | 95.8       | 0.2837085 | 0.6444851             | 0.971646             | 42.18656  |
| Guinea                   | 95.8       | 0.293301  | 0.6895447             | 0.992389             | 37.95065  |
| Myanmar                  | 95.8       | 0.5471697 | 0.7521398             | 0.8987807            | 46.04166  |
| Senegal                  | 95.7       | 0.3356177 | 0.7860705             | 0.7666046            | 43.31968  |
| Burkina Faso             | 95.6       | 0.2436228 | 0.7681949             | 0.9427786            | 42.88351  |
| Eritrea                  | 95.5       | 0.3593767 | 0.6274313             | 0.5782523            | 37.5352   |
| Ghana                    | 95.5       | 0.4660732 | 0.7692041             | 0.7690164            | 48.30972  |
| Somalia                  | 95.5       | 0.2506504 | 0.3849675             | 0.9826643            | 33.9607   |
| Angola                   | 95.4       | 0.3883473 | 0.4913355             | 0.5723949            | 38.60574  |
| Burundi                  | 95.4       | 0.252218  | 0.7412183             | 0.9879677            | 40.88814  |
| Malawi                   | 95.4       | 0.3196185 | 0.8217424             | 0.9812899            | 45.68607  |
| Kenya                    | 95.3       | 0.4892204 | 0.6503803             | 0.8369064            | 47.919    |
| Madagascar               | 95.3       | 0.3440305 | 0.4014947             | 0.9962132            | 42.2817   |
| Mozambique               | 95.3       | 0.2678759 | 0.4586158             | 0.9636069            | 41.38808  |
| Rwanda                   | 95.3       | 0.3539438 | 0.7308414             | 0.994279             | 47.5149   |
| Zambia                   | 95.2       | 0.4284829 | 0.6199216             | 0.8764653            | 38.90112  |
| Central African Republic | 95.1       | 0.3217212 | 0.4883434             | 0.992653             | 28.89511  |
| Chad                     | 95.1       | 0.2736233 | 0.5406239             | 0.9646205            | 36.91996  |
| Nigeria                  | 95.1       | 0.4434152 | 0.5474162             | 0.7552633            | 50.06386  |
| South Sudan              | 95.1       | 0.169572  | 0.6391081             | 0.9916456            | 39.23368  |
| Tanzania                 | 95.1       | 0.3924812 | 0.5688567             | 0.9772893            | 49.20856  |
| Uganda                   | 95.1       | 0.337937  | 0.7467108             | 0.9867676            | 42.09132  |
| Mongolia                 | 94.9       | 0.6670125 | 0.6764177             | 0.7859513            | 56.42357  |
| Lesotho                  | 94.8       | 0.5212262 | 0.8217002             | 0.6309745            | 35.47194  |
| Comoros                  | 94.4       | 0.4187506 | 0.8964573             | 0.8052982            | 47.73715  |
| Namibia                  | 94.4       | 0.5971622 | 0.8950112             | 0.592881             | 52.2355   |
| Botswana                 | 94.3       | 0.6754337 | 0.9601774             | 0.4042182            | 50.02428  |
| Togo                     | 94.2       | 0.373095  | 0.500731              | 0.949856             | 42.67131  |
| Mauritius                | 94         | 0.7387585 | 0.9858173             | 0.0428925            | 63.97056  |
| Sierra Leone             | 93.8       | 0.3217548 | 0.5785236             | 0.9905465            | 39.49081  |
| Thailand                 | 93.3       | 0.7087615 | 0.5789928             | 0.2042466            | 69.65243  |
| Estonia                  | 92.3       | 0.8765746 | 0.9836423             | 0.1059044            | 79.51588  |
| Liberia                  | 92.3       | 0.2975346 | 0.7128679             | 0.9918571            | 44.07752  |

|                     |      |           |           |           |          |
|---------------------|------|-----------|-----------|-----------|----------|
| Papua New Guinea    | 92   | 0.3936445 | 0.4669533 | 0.8296739 | 36.99497 |
| Slovakia            | 89.3 | 0.8683832 | 0.9637777 | 0.0370221 | 76.32784 |
| Latvia              | 89   | 0.8501076 | 0.9838138 | 0.0829824 | 75.93285 |
| Singapore           | 88.7 | 0.8727415 | 0.9843521 | 0.001393  | 85.16716 |
| Cambodia            | 87.8 | 0.4699593 | 0.5026168 | 0.8607864 | 47.55624 |
| Guyana              | 87.5 | 0.6208591 | 0.6512252 | 0.1022214 | 48.00732 |
| Poland              | 87.2 | 0.8552011 | 0.9624795 | 0.0809213 | 77.51173 |
| Lithuania           | 86.7 | 0.8618109 | 0.9679642 | 0.0304079 | 75.07384 |
| Indonesia           | 86.4 | 0.6432723 | 0.6838619 | 0.4665855 | 47.89911 |
| China               | 86.3 | 0.698382  | 0.9131855 | 0.462104  | 71.97395 |
| Croatia             | 86.3 | 0.8429422 | 0.986375  | 0.1245127 | 79.68633 |
| Belarus             | 86.1 | 0.8098246 | 0.9753374 | 0.0122462 | 72.75752 |
| Pakistan            | 85.6 | 0.4782369 | 0.9216352 | 0.6812232 | 42.10178 |
| Chile               | 85.2 | 0.782218  | 0.9443579 | 0.0663029 | 74.66572 |
| Serbia              | 85.1 | 0.7614746 | 0.8851467 | 0.287456  | 74.17399 |
| Slovenia            | 85   | 0.8714591 | 0.9955854 | 0.0720408 | 85.78991 |
| Sri Lanka           | 85   | 0.6656639 | 0.8730677 | 0.6901498 | 70.55164 |
| Turkmenistan        | 83.4 | 0.7258834 | 0.9039219 | 0.0133138 | 55.94375 |
| Belize              | 83.3 | 0.6079586 | 0.7350473 | 0.1599554 | 56.99096 |
| Fiji                | 83.3 | 0.7205338 | 0.9458302 | 0.3085322 | 45.64901 |
| Uzbekistan          | 83.3 | 0.6707062 | 0.9093039 | 0.1939895 | 60.7042  |
| India               | 82.9 | 0.5430225 | 0.8903347 | 0.5929375 | 42.59068 |
| Kyrgyzstan          | 82   | 0.6140479 | 0.8899494 | 0.3045161 | 58.98535 |
| Kazakhstan          | 81.2 | 0.7396165 | 0.9474311 | 0.1340845 | 59.98231 |
| Albania             | 80.9 | 0.710576  | 0.8464829 | 0.2981147 | 76.56293 |
| Afghanistan         | 80.7 | 0.2548034 | 0.5715241 | 0.8136431 | 30.64038 |
| Tajikistan          | 80.6 | 0.563803  | 0.7245759 | 0.3493501 | 56.7099  |
| Ukraine             | 80.6 | 0.7854332 | 0.9399671 | 0.0454767 | 71.97182 |
| Bangladesh          | 80.1 | 0.4759489 | 0.9811701 | 0.8964234 | 50.05209 |
| Bhutan              | 80   | 0.5524619 | 0.9484282 | 0.4482564 | 51.0114  |
| Hungary             | 80   | 0.8383694 | 0.9951285 | 0.1326214 | 77.2195  |
| Romania             | 80   | 0.8222468 | 0.8043945 | 0.1768524 | 72.51046 |
| Suriname            | 80   | 0.6734836 | 0.9144762 | 0.1625742 | 54.5168  |
| Brazil              | 79.9 | 0.6855165 | 0.9844739 | 0.080044  | 63.62204 |
| Trinidad and Tobago | 78.6 | 0.7599835 | 0.9342995 | 0.006505  | 61.27617 |
| Japan               | 78.4 | 0.876547  | 0.9856223 | 0.0009266 | 88.50639 |
| Nicaragua           | 78.1 | 0.5620469 | 0.8729433 | 0.5179757 | 62.91613 |
| Haiti               | 77.7 | 0.4127922 | 0.4884083 | 0.9370795 | 36.90585 |
| Nepal               | 77.7 | 0.4171257 | 0.8930547 | 0.8091615 | 48.94768 |
| Cuba                | 77.5 | 0.7572473 | 0.931891  | 0.0296171 | 72.3793  |
| Paraguay            | 77.3 | 0.635765  | 0.9003635 | 0.4127544 | 59.28289 |
| Bolivia             | 77.2 | 0.5861735 | 0.8867787 | 0.2813707 | 57.46043 |
| Venezuela           | 77.2 | 0.7208425 | 0.955869  | 0.0168833 | 64.94327 |

|                      |      |           |           |           |          |
|----------------------|------|-----------|-----------|-----------|----------|
| Guatemala            | 77   | 0.5367455 | 0.9348995 | 0.4860598 | 54.04214 |
| Portugal             | 77   | 0.7866725 | 0.9977095 | 0.024514  | 82.56662 |
| Dominican Republic   | 76.9 | 0.6683926 | 0.4720352 | 0.1204211 | 61.6235  |
| Montenegro           | 76.9 | 0.8030106 | 0.9569953 | 0.4192286 | 79.38941 |
| Mexico               | 76.7 | 0.728041  | 0.9473426 | 0.066959  | 61.28267 |
| Mexico               | 76.7 | 0.712159  | 0.9513972 | 0.1444901 | 62.98865 |
| Honduras             | 76.6 | 0.5448053 | 0.6802787 | 0.541191  | 52.876   |
| Panama               | 76.4 | 0.7175655 | 0.9454027 | 0.1622151 | 62.72926 |
| Peru                 | 76.3 | 0.6632558 | 0.8379584 | 0.324628  | 67.29581 |
| Jamaica              | 75.8 | 0.6911253 | 0.9044116 | 0.119185  | 63.1513  |
| El Salvador          | 75.6 | 0.6169341 | 0.9096631 | 0.2106771 | 62.94157 |
| Uruguay              | 75.3 | 0.7294097 | 0.9616365 | 0.0167805 | 71.22957 |
| Maldives             | 75   | 0.6509901 | 0.8761854 | 0.0762308 | 74.98264 |
| Greece               | 74.8 | 0.8525788 | 0.9946353 | 0.0072727 | 85.34872 |
| Ecuador              | 72.3 | 0.6553559 | 0.8382855 | 0.0695997 | 59.80069 |
| Italy                | 72.2 | 0.8616537 | 0.9731147 | 0.0094357 | 87.99769 |
| Argentina            | 71.8 | 0.7445155 | 0.9773318 | 0.0403481 | 67.26058 |
| Puerto Rico          | 71.3 | 0.8682803 | 0.9678878 | 0.0027099 | 74.85159 |
| Turkey               | 70.9 | 0.7309635 | 0.7236533 | 0.0289763 | 75.37779 |
| Philippines          | 70.5 | 0.6190118 | 0.6470509 | 0.6294172 | 50.63124 |
| Barbados             | 70   | 0.7899293 | 0.9874884 | 0.0015912 | 66.13252 |
| Spain                | 69.9 | 0.8431252 | 0.9979746 | 0.0146491 | 88.14818 |
| Yemen                | 69.7 | 0.3979337 | 0.4910526 | 0.3491732 | 48.76109 |
| Zimbabwe             | 69   | 0.4737589 | 0.7733714 | 0.6886539 | 44.06696 |
| Bulgaria             | 68.9 | 0.8323442 | 0.9602885 | 0.1264881 | 69.03984 |
| Germany              | 68.9 | 0.8796307 | 0.995062  | 0.0119275 | 85.48669 |
| Colombia             | 68.2 | 0.6790322 | 0.9231676 | 0.2088578 | 65.65761 |
| Costa Rica           | 65.1 | 0.7036828 | 0.9938776 | 0.078099  | 71.65074 |
| Iraq                 | 65   | 0.4323598 | 0.8237174 | 0.0120258 | 58.54839 |
| Saudi Arabia         | 65   | 0.7458847 | 0.9221632 | 0.0203691 | 78.42365 |
| Sudan                | 64.9 | 0.4801974 | 0.6798086 | 0.6500466 | 48.42831 |
| Tunisia              | 64.9 | 0.6666551 | 0.8573115 | 0.0073916 | 68.5005  |
| Egypt                | 62.3 | 0.6225914 | 0.9696563 | 0.0048356 | 59.06907 |
| Malaysia             | 62.1 | 0.7422902 | 0.9788215 | 0.0150146 | 64.65762 |
| Lebanon              | 61.9 | 0.7966968 | 0.6335686 | 0.0001295 | 78.45633 |
| Czech Republic       | 61.5 | 0.8730644 | 0.9968561 | 0.0260234 | 83.04813 |
| United Arab Emirates | 60.9 | 0.7506719 | 0.8273565 | 0.0495193 | 71.54    |
| Azerbaijan           | 60.6 | 0.7466661 | 0.8429279 | 0.163501  | 61.82902 |
| Austria              | 60.5 | 0.8845051 | 0.9786069 | 0.0133661 | 86.91602 |
| Switzerland          | 58.9 | 0.8932123 | 0.9952022 | 0.0140723 | 90.88026 |
| Finland              | 56.7 | 0.9001482 | 0.9955437 | 0.0073241 | 88.23843 |
| Morocco              | 55.6 | 0.5893786 | 0.8282948 | 0.0573885 | 59.87075 |
| Belgium              | 54.6 | 0.8930314 | 0.9953721 | 0.0049786 | 86.94695 |

|                |      |           |           |           |          |
|----------------|------|-----------|-----------|-----------|----------|
| Armenia        | 54.5 | 0.7347708 | 0.9558374 | 0.0229359 | 65.35338 |
| Oman           | 54.5 | 0.675623  | 0.7605554 | 0.0725301 | 73.62875 |
| Georgia        | 52   | 0.7314408 | 0.9586898 | 0.4526661 | 61.34325 |
| Cyprus         | 50   | 0.8675599 | 0.9949666 | 0.0089806 | 83.90007 |
| Jordan         | 50   | 0.6694312 | 0.7833459 | 0.0005995 | 75.79024 |
| Kuwait         | 50   | 0.8081329 | 0.9239886 | 0.0177137 | 79.12867 |
| Malta          | 50   | 0.8450488 | 0.9944727 | 0.0090271 | 83.53316 |
| Denmark        | 49.3 | 0.9222978 | 0.9959613 | 0.0041093 | 84.44193 |
| Sweden         | 47.5 | 0.866955  | 0.9946761 | 0.0175916 | 89.31772 |
| Algeria        | 47   | 0.6418771 | 0.8718388 | 0.0041284 | 63.00277 |
| Luxembourg     | 45.8 | 0.928878  | 0.9958673 | 0.0065134 | 88.09482 |
| Australia      | 45.6 | 0.8785403 | 0.9855105 | 0.0047648 | 88.75545 |
| Ireland        | 45.4 | 0.8737457 | 0.9948518 | 0.0093545 | 86.77013 |
| Iceland        | 45   | 0.9094412 | 0.9957234 | 0.006488  | 92.61529 |
| Norway         | 44.1 | 0.9162598 | 0.9956161 | 0.0098957 | 88.90649 |
| Qatar          | 42.9 | 0.7693111 | 0.91709   | 0.000657  | 84.70576 |
| Canada         | 40.9 | 0.902691  | 0.993894  | 0.0019987 | 86.90737 |
| New Zealand    | 39.8 | 0.8556332 | 0.9844599 | 0.0060908 | 85.09032 |
| Israel         | 39.6 | 0.7956893 | 0.9928728 | 0.0100482 | 84.61298 |
| Libya          | 38.9 | 0.7928386 | 0.9236626 | 0.0080853 | 70.90197 |
| United Kingdom | 36.4 | 0.8528052 | 0.9943225 | 0.008295  | 83.44392 |
| Bahrain        | 28.6 | 0.7180979 | 0.9014279 | 0.061035  | 78.42273 |
